# Supplementary material for: Intratumoral IL12 mRNA Therapy Promotes TH1 Transformation of the Tumor Microenvironment
Source: Oxford University Press journal article supplement (doi:10.1158/1078-0432.ccr-20-0472), 2020-08-17
Supplement: 10780432ccr200472-sup-236987_2_supp_6408147_qd3fsw.xlsx [file 10780432ccr200472-sup-236987_2_supp_6408147_qd3fsw.xlsx]

## Sheet: Differentially expressed genes
Comparison	Symbol	Numerator.log2expr	Denominator.log2expr	log2FC	Pv	FDR
IL12mRNA.24hr.05/NS.CTL.24hr.5	1810014B01Rik	7.07577	5.91117	1.16459	0.001	0.015
IL12mRNA.24hr.05/NS.CTL.24hr.5	2610005L07Rik	8.7519	7.34199	1.40991	0	0
IL12mRNA.24hr.05/NS.CTL.24hr.5	2610305J24Rik	8.73444	7.16926	1.56518	0	0
IL12mRNA.24hr.05/NS.CTL.24hr.5	2610507B11Rik	8.49322	6.81807	1.67515	0	0
IL12mRNA.24hr.05/NS.CTL.24hr.5	3930401B19Rik	11.7535	10.6111	1.14234	0.001	0.015
IL12mRNA.24hr.05/NS.CTL.24hr.5	5830443J22Rik	5.66168	4.60735	1.05433	0.001	0.015
IL12mRNA.24hr.05/NS.CTL.24hr.5	6430590A07Rik	6.28553	5.27617	1.00937	0	0
IL12mRNA.24hr.05/NS.CTL.24hr.5	A130012E19Rik	6.425	4.82063	1.60437	0	0
IL12mRNA.24hr.05/NS.CTL.24hr.5	Abca9	4.67461	5.87993	-1.20532	0	0
IL12mRNA.24hr.05/NS.CTL.24hr.5	Abl2	7.44013	5.77171	1.66842	0	0
IL12mRNA.24hr.05/NS.CTL.24hr.5	Adig	4.92319	6.09408	-1.17089	0.003	0.03
IL12mRNA.24hr.05/NS.CTL.24hr.5	Adipoq	6.74191	9.46626	-2.72435	0.002	0.024
IL12mRNA.24hr.05/NS.CTL.24hr.5	Akap9	7.71774	5.77822	1.93953	0.002	0.024
IL12mRNA.24hr.05/NS.CTL.24hr.5	Aldh2	5.09659	3.98723	1.10936	0.002	0.024
IL12mRNA.24hr.05/NS.CTL.24hr.5	Ammecr1	8.06082	7.01631	1.04451	0.004	0.036
IL12mRNA.24hr.05/NS.CTL.24hr.5	Ankrd52	6.88456	5.16212	1.72243	0	0
IL12mRNA.24hr.05/NS.CTL.24hr.5	Anp32a	8.92249	7.54766	1.37483	0.003	0.03
IL12mRNA.24hr.05/NS.CTL.24hr.5	Aqp1	8.42742	9.50289	-1.07546	0	0
IL12mRNA.24hr.05/NS.CTL.24hr.5	Arid5b	6.69679	5.38467	1.31212	0.003	0.03
IL12mRNA.24hr.05/NS.CTL.24hr.5	Arpc2	5.79988	4.77338	1.0265	0	0
IL12mRNA.24hr.05/NS.CTL.24hr.5	Aspm	7.30222	5.99045	1.31176	0.001	0.015
IL12mRNA.24hr.05/NS.CTL.24hr.5	Atm	8.46545	7.46479	1.00066	0	0
IL12mRNA.24hr.05/NS.CTL.24hr.5	Atp1a2	4.44271	6.33686	-1.89415	0.002	0.024
IL12mRNA.24hr.05/NS.CTL.24hr.5	Atp2b1	9.86821	8.45231	1.4159	0.002	0.024
IL12mRNA.24hr.05/NS.CTL.24hr.5	BB144871	4.28194	6.12505	-1.8431	0.005	0.04
IL12mRNA.24hr.05/NS.CTL.24hr.5	Birc6	6.01319	4.73681	1.27638	0.002	0.024
IL12mRNA.24hr.05/NS.CTL.24hr.5	C80425	5.27096	4.09989	1.17107	0	0
IL12mRNA.24hr.05/NS.CTL.24hr.5	Car3	8.74727	11.2718	-2.52452	0.003	0.03
IL12mRNA.24hr.05/NS.CTL.24hr.5	Cbr2	6.43226	7.73189	-1.29963	0.004	0.036
IL12mRNA.24hr.05/NS.CTL.24hr.5	Ccdc58	7.06251	5.61822	1.44428	0.001	0.015
IL12mRNA.24hr.05/NS.CTL.24hr.5	Ccl1	4.94073	6.04729	-1.10657	0	0
IL12mRNA.24hr.05/NS.CTL.24hr.5	Cd163	5.03332	6.29249	-1.25916	0.002	0.024
IL12mRNA.24hr.05/NS.CTL.24hr.5	Cd200r4	6.00467	4.75793	1.24674	0	0
IL12mRNA.24hr.05/NS.CTL.24hr.5	Cd209g	4.0724	5.26598	-1.19358	0.005	0.04
IL12mRNA.24hr.05/NS.CTL.24hr.5	Cd274	9.48158	8.24462	1.23696	0	0
IL12mRNA.24hr.05/NS.CTL.24hr.5	Cd2ap	6.96401	5.68712	1.27689	0.001	0.015
IL12mRNA.24hr.05/NS.CTL.24hr.5	Cebpa	7.51193	8.52948	-1.01756	0.002	0.024
IL12mRNA.24hr.05/NS.CTL.24hr.5	Cenpa	6.6368	5.41025	1.22655	0	0
IL12mRNA.24hr.05/NS.CTL.24hr.5	Cenpe	7.69541	5.15297	2.54244	0	0
IL12mRNA.24hr.05/NS.CTL.24hr.5	Cfap97	6.68293	5.33415	1.34878	0.003	0.03
IL12mRNA.24hr.05/NS.CTL.24hr.5	Cfd	8.05306	10.6592	-2.60618	0.001	0.015
IL12mRNA.24hr.05/NS.CTL.24hr.5	Chd2	7.03674	5.5494	1.48734	0	0
IL12mRNA.24hr.05/NS.CTL.24hr.5	Chd4	10.0465	8.81533	1.23118	0.002	0.024
IL12mRNA.24hr.05/NS.CTL.24hr.5	Chic1	6.98659	5.69704	1.28955	0.001	0.015
IL12mRNA.24hr.05/NS.CTL.24hr.5	Cidec	4.24225	6.4007	-2.15844	0.005	0.04
IL12mRNA.24hr.05/NS.CTL.24hr.5	Clip1	6.34968	4.95549	1.39419	0	0
IL12mRNA.24hr.05/NS.CTL.24hr.5	Cnot10	6.53655	5.51698	1.01958	0.001	0.015
IL12mRNA.24hr.05/NS.CTL.24hr.5	Col1a1	10.6553	11.7146	-1.0593	0.001	0.015
IL12mRNA.24hr.05/NS.CTL.24hr.5	Cpd	7.40252	5.98661	1.41591	0	0
IL12mRNA.24hr.05/NS.CTL.24hr.5	Crebbp	8.74844	7.4128	1.33564	0	0
IL12mRNA.24hr.05/NS.CTL.24hr.5	Ctcf	10.6657	9.64263	1.0231	0.003	0.03
IL12mRNA.24hr.05/NS.CTL.24hr.5	Cxcl11	10.5775	9.38553	1.19193	0	0
IL12mRNA.24hr.05/NS.CTL.24hr.5	Cxcl9	8.73892	7.25259	1.48633	0	0
IL12mRNA.24hr.05/NS.CTL.24hr.5	Cyp2e1	4.81795	7.05565	-2.2377	0.006	0.045
IL12mRNA.24hr.05/NS.CTL.24hr.5	D230040J21Rik	6.77037	5.55993	1.21043	0	0
IL12mRNA.24hr.05/NS.CTL.24hr.5	D2Ertd93e	7.03963	5.91909	1.12054	0.001	0.015
IL12mRNA.24hr.05/NS.CTL.24hr.5	Ddhd2	4.75192	3.53847	1.21345	0	0
IL12mRNA.24hr.05/NS.CTL.24hr.5	Ddit3	7.52672	6.008	1.51872	0	0
IL12mRNA.24hr.05/NS.CTL.24hr.5	Dgkd	5.90704	4.85758	1.04946	0.006	0.045
IL12mRNA.24hr.05/NS.CTL.24hr.5	Dnajc2	10.4867	8.87484	1.61189	0.001	0.015
IL12mRNA.24hr.05/NS.CTL.24hr.5	Dnajc21	10.2185	8.76693	1.45159	0.001	0.015
IL12mRNA.24hr.05/NS.CTL.24hr.5	Dzip3	5.98057	4.90905	1.07152	0.001	0.015
IL12mRNA.24hr.05/NS.CTL.24hr.5	Ednrb	6.05183	7.16266	-1.11083	0	0
IL12mRNA.24hr.05/NS.CTL.24hr.5	Edrf1	4.88886	3.81088	1.07798	0	0
IL12mRNA.24hr.05/NS.CTL.24hr.5	Eif3a	8.76382	6.46788	2.29594	0.006	0.045
IL12mRNA.24hr.05/NS.CTL.24hr.5	Eif3c	11.3019	9.42779	1.87411	0.006	0.045
IL12mRNA.24hr.05/NS.CTL.24hr.5	Elavl2	8.18728	7.05741	1.12987	0.003	0.03
IL12mRNA.24hr.05/NS.CTL.24hr.5	Elf2	7.73604	6.37894	1.3571	0	0
IL12mRNA.24hr.05/NS.CTL.24hr.5	Eln	6.51386	7.91084	-1.39698	0.003	0.03
IL12mRNA.24hr.05/NS.CTL.24hr.5	Endod1	5.62167	4.5975	1.02417	0.006	0.045
IL12mRNA.24hr.05/NS.CTL.24hr.5	Ep400	7.27201	6.2042	1.06781	0.004	0.036
IL12mRNA.24hr.05/NS.CTL.24hr.5	Esco1	7.15348	6.08803	1.06545	0.005	0.04
IL12mRNA.24hr.05/NS.CTL.24hr.5	Fabp4	9.47929	11.3011	-1.82179	0.001	0.015
IL12mRNA.24hr.05/NS.CTL.24hr.5	Fam26f	8.228	6.65088	1.57712	0.003	0.03
IL12mRNA.24hr.05/NS.CTL.24hr.5	Fam92a	4.87343	3.78836	1.08507	0	0
IL12mRNA.24hr.05/NS.CTL.24hr.5	Far1	8.47909	7.39557	1.08351	0.003	0.03
IL12mRNA.24hr.05/NS.CTL.24hr.5	Farsa	6.63966	5.62399	1.01568	0	0
IL12mRNA.24hr.05/NS.CTL.24hr.5	Fhl1	5.05359	6.43979	-1.38619	0.004	0.036
IL12mRNA.24hr.05/NS.CTL.24hr.5	G0s2	5.64825	6.76753	-1.11928	0.002	0.024
IL12mRNA.24hr.05/NS.CTL.24hr.5	Gabpb2	6.71484	5.4703	1.24454	0	0
IL12mRNA.24hr.05/NS.CTL.24hr.5	Gas2l3	8.01514	6.97626	1.03889	0.001	0.015
IL12mRNA.24hr.05/NS.CTL.24hr.5	Gas6	6.25073	7.95697	-1.70625	0.001	0.015
IL12mRNA.24hr.05/NS.CTL.24hr.5	Gbp2b	6.23659	4.56094	1.67564	0	0
IL12mRNA.24hr.05/NS.CTL.24hr.5	Gbp6	10.263	9.06914	1.19389	0	0
IL12mRNA.24hr.05/NS.CTL.24hr.5	Gbp7	11.4948	10.2853	1.20948	0.002	0.024
IL12mRNA.24hr.05/NS.CTL.24hr.5	Gbp8	7.39077	5.96953	1.42124	0.002	0.024
IL12mRNA.24hr.05/NS.CTL.24hr.5	Gemin5	6.40974	4.92146	1.48829	0.001	0.015
IL12mRNA.24hr.05/NS.CTL.24hr.5	Gm2590	5.7891	4.72582	1.06328	0.003	0.03
IL12mRNA.24hr.05/NS.CTL.24hr.5	Gm4354	11.216	9.75211	1.46391	0.003	0.03
IL12mRNA.24hr.05/NS.CTL.24hr.5	Gmfb	7.15678	5.99873	1.15805	0.004	0.036
IL12mRNA.24hr.05/NS.CTL.24hr.5	Gnai1	4.69633	6.33849	-1.64216	0.005	0.04
IL12mRNA.24hr.05/NS.CTL.24hr.5	Gnas	5.42986	4.37198	1.05788	0	0
IL12mRNA.24hr.05/NS.CTL.24hr.5	Gpbp1	8.42628	6.29161	2.13467	0.004	0.036
IL12mRNA.24hr.05/NS.CTL.24hr.5	Grem1	9.0364	7.83436	1.20203	0	0
IL12mRNA.24hr.05/NS.CTL.24hr.5	Hbegf	8.56823	7.46236	1.10586	0	0
IL12mRNA.24hr.05/NS.CTL.24hr.5	Hdlbp	7.10526	5.66498	1.44028	0.001	0.015
IL12mRNA.24hr.05/NS.CTL.24hr.5	Hp	8.82207	11.1047	-2.28264	0	0
IL12mRNA.24hr.05/NS.CTL.24hr.5	Htra3	6.89298	8.1482	-1.25522	0.006	0.045
IL12mRNA.24hr.05/NS.CTL.24hr.5	Ifi213	7.70619	6.28014	1.42605	0.001	0.015
IL12mRNA.24hr.05/NS.CTL.24hr.5	Ifng	7.69404	5.41465	2.27939	0	0
IL12mRNA.24hr.05/NS.CTL.24hr.5	Iigp1	12.1129	10.7449	1.36801	0.002	0.024
IL12mRNA.24hr.05/NS.CTL.24hr.5	Ikzf2	5.48265	4.32882	1.15382	0	0
IL12mRNA.24hr.05/NS.CTL.24hr.5	Il12a	9.10165	4.11617	4.98548	0.001	0.015
IL12mRNA.24hr.05/NS.CTL.24hr.5	Il12b	7.03764	3.71617	3.32147	0.003	0.03
IL12mRNA.24hr.05/NS.CTL.24hr.5	Ilf3	7.22038	5.79455	1.42584	0.004	0.036
IL12mRNA.24hr.05/NS.CTL.24hr.5	Ino80d	8.10646	6.76435	1.34212	0	0
IL12mRNA.24hr.05/NS.CTL.24hr.5	Itch	5.94055	4.88281	1.05774	0	0
IL12mRNA.24hr.05/NS.CTL.24hr.5	Jak1	7.36174	5.48274	1.879	0.001	0.015
IL12mRNA.24hr.05/NS.CTL.24hr.5	Kif1b	6.01606	4.95269	1.06337	0.001	0.015
IL12mRNA.24hr.05/NS.CTL.24hr.5	Krit1	6.5404	4.82323	1.71717	0	0
IL12mRNA.24hr.05/NS.CTL.24hr.5	Larp4	7.70813	6.58887	1.11926	0.002	0.024
IL12mRNA.24hr.05/NS.CTL.24hr.5	Lipe	6.19067	7.40357	-1.2129	0.006	0.045
IL12mRNA.24hr.05/NS.CTL.24hr.5	Lpp	7.49081	5.71074	1.78007	0.006	0.045
IL12mRNA.24hr.05/NS.CTL.24hr.5	Lrg1	7.45676	9.22427	-1.76751	0.001	0.015
IL12mRNA.24hr.05/NS.CTL.24hr.5	Luc7l2	8.14839	6.88826	1.26013	0.001	0.015
IL12mRNA.24hr.05/NS.CTL.24hr.5	Luc7l3	10.3194	9.07423	1.24515	0	0
IL12mRNA.24hr.05/NS.CTL.24hr.5	Luzp1	7.15069	5.92326	1.22743	0	0
IL12mRNA.24hr.05/NS.CTL.24hr.5	Malat1	9.05364	6.09876	2.95488	0	0
IL12mRNA.24hr.05/NS.CTL.24hr.5	2018-03-07	6.26724	5.2316	1.03564	0	0
IL12mRNA.24hr.05/NS.CTL.24hr.5	Mbnl1	5.05124	3.98245	1.06879	0	0
IL12mRNA.24hr.05/NS.CTL.24hr.5	Mbp	4.32576	5.73381	-1.40805	0.004	0.036
IL12mRNA.24hr.05/NS.CTL.24hr.5	Mgll	5.04305	6.7503	-1.70724	0.001	0.015
IL12mRNA.24hr.05/NS.CTL.24hr.5	Mia3	6.5319	5.23682	1.29508	0	0
IL12mRNA.24hr.05/NS.CTL.24hr.5	Mrap	4.1959	5.46854	-1.27264	0.006	0.045
IL12mRNA.24hr.05/NS.CTL.24hr.5	Mrc1	6.40982	7.62576	-1.21594	0.005	0.04
IL12mRNA.24hr.05/NS.CTL.24hr.5	Myl9	5.11497	6.38683	-1.27186	0.003	0.03
IL12mRNA.24hr.05/NS.CTL.24hr.5	Naa15	8.73006	7.53917	1.19088	0.006	0.045
IL12mRNA.24hr.05/NS.CTL.24hr.5	Ncapg	8.47294	6.5812	1.89174	0.001	0.015
IL12mRNA.24hr.05/NS.CTL.24hr.5	Ndel1	6.59014	5.42692	1.16322	0	0
IL12mRNA.24hr.05/NS.CTL.24hr.5	Nedd4	9.92038	8.79282	1.12756	0.001	0.015
IL12mRNA.24hr.05/NS.CTL.24hr.5	Nono	6.3772	5.36419	1.01301	0.001	0.015
IL12mRNA.24hr.05/NS.CTL.24hr.5	Npat	4.89105	3.64156	1.24949	0	0
IL12mRNA.24hr.05/NS.CTL.24hr.5	Orm1	4.78819	5.81305	-1.02486	0.004	0.036
IL12mRNA.24hr.05/NS.CTL.24hr.5	Pan3	5.99235	4.29161	1.70074	0	0
IL12mRNA.24hr.05/NS.CTL.24hr.5	Pank3	8.38854	7.2756	1.11294	0.005	0.04
IL12mRNA.24hr.05/NS.CTL.24hr.5	Peg3	4.20352	5.48492	-1.2814	0.005	0.04
IL12mRNA.24hr.05/NS.CTL.24hr.5	Peli1	5.51025	4.12758	1.38267	0	0
IL12mRNA.24hr.05/NS.CTL.24hr.5	Plaa	7.16535	5.75362	1.41173	0.005	0.04
IL12mRNA.24hr.05/NS.CTL.24hr.5	Plcxd2	6.70497	5.5479	1.15707	0	0
IL12mRNA.24hr.05/NS.CTL.24hr.5	Plec	6.7764	5.15562	1.62078	0	0
IL12mRNA.24hr.05/NS.CTL.24hr.5	Plin4	5.90061	7.73355	-1.83294	0.001	0.015
IL12mRNA.24hr.05/NS.CTL.24hr.5	Plk4	7.59278	6.03233	1.56045	0.002	0.024
IL12mRNA.24hr.05/NS.CTL.24hr.5	Plscr2	5.64692	4.49096	1.15595	0.005	0.04
IL12mRNA.24hr.05/NS.CTL.24hr.5	Pten	6.63457	5.14441	1.49016	0	0
IL12mRNA.24hr.05/NS.CTL.24hr.5	Ptp4a2	8.96985	7.33955	1.6303	0.004	0.036
IL12mRNA.24hr.05/NS.CTL.24hr.5	Ptprs	7.34992	6.31266	1.03725	0	0
IL12mRNA.24hr.05/NS.CTL.24hr.5	Pttg1ip	7.23616	5.93945	1.29671	0	0
IL12mRNA.24hr.05/NS.CTL.24hr.5	Pum1	7.86693	6.84272	1.02421	0.003	0.03
IL12mRNA.24hr.05/NS.CTL.24hr.5	Purb	10.1313	9.05395	1.07738	0.002	0.024
IL12mRNA.24hr.05/NS.CTL.24hr.5	Ranbp2	4.59925	3.46544	1.13381	0.001	0.015
IL12mRNA.24hr.05/NS.CTL.24hr.5	Rb1cc1	6.76261	4.99602	1.7666	0.002	0.024
IL12mRNA.24hr.05/NS.CTL.24hr.5	Rbm39	8.05103	6.64503	1.406	0.006	0.045
IL12mRNA.24hr.05/NS.CTL.24hr.5	Rbm5	6.06261	4.16781	1.8948	0.001	0.015
IL12mRNA.24hr.05/NS.CTL.24hr.5	Rcor1	8.58681	7.26489	1.32192	0	0
IL12mRNA.24hr.05/NS.CTL.24hr.5	Rdx	9.42127	7.96097	1.4603	0.002	0.024
IL12mRNA.24hr.05/NS.CTL.24hr.5	Retn	6.88248	8.80355	-1.92107	0.003	0.03
IL12mRNA.24hr.05/NS.CTL.24hr.5	Rictor	6.04149	4.84052	1.20097	0	0
IL12mRNA.24hr.05/NS.CTL.24hr.5	Rif1	7.12998	5.81018	1.3198	0.004	0.036
IL12mRNA.24hr.05/NS.CTL.24hr.5	Rlf	5.36971	3.95127	1.41844	0	0
IL12mRNA.24hr.05/NS.CTL.24hr.5	Rnf125	7.16936	6.14753	1.02183	0.001	0.015
IL12mRNA.24hr.05/NS.CTL.24hr.5	Scd1	9.93961	11.1772	-1.23759	0.002	0.024
IL12mRNA.24hr.05/NS.CTL.24hr.5	Secisbp2	7.32081	6.05991	1.2609	0.002	0.024
IL12mRNA.24hr.05/NS.CTL.24hr.5	Setd5	6.12099	4.86254	1.25845	0.002	0.024
IL12mRNA.24hr.05/NS.CTL.24hr.5	Sfpq	8.91451	7.59693	1.31758	0.002	0.024
IL12mRNA.24hr.05/NS.CTL.24hr.5	Slc20a1	5.57385	4.46408	1.10977	0	0
IL12mRNA.24hr.05/NS.CTL.24hr.5	Slc5a3	7.2632	6.00578	1.25742	0.001	0.015
IL12mRNA.24hr.05/NS.CTL.24hr.5	Slco2b1	4.83301	5.89467	-1.06166	0	0
IL12mRNA.24hr.05/NS.CTL.24hr.5	Slk	7.45265	6.18474	1.26791	0.004	0.036
IL12mRNA.24hr.05/NS.CTL.24hr.5	Smarcc1	7.44462	5.89527	1.54935	0.004	0.036
IL12mRNA.24hr.05/NS.CTL.24hr.5	Smc2	8.72032	6.84715	1.87317	0.002	0.024
IL12mRNA.24hr.05/NS.CTL.24hr.5	Smg1	8.17217	6.96538	1.20678	0	0
IL12mRNA.24hr.05/NS.CTL.24hr.5	Sod3	7.14905	8.5118	-1.36275	0.004	0.036
IL12mRNA.24hr.05/NS.CTL.24hr.5	Sppl2a	8.49975	6.2234	2.27636	0.006	0.045
IL12mRNA.24hr.05/NS.CTL.24hr.5	Stat1	7.76186	6.1566	1.60526	0	0
IL12mRNA.24hr.05/NS.CTL.24hr.5	Tacc1	8.5985	7.36295	1.23556	0.005	0.04
IL12mRNA.24hr.05/NS.CTL.24hr.5	Taf15	8.04665	5.85281	2.19383	0.002	0.024
IL12mRNA.24hr.05/NS.CTL.24hr.5	Taok1	6.68079	5.54043	1.14036	0	0
IL12mRNA.24hr.05/NS.CTL.24hr.5	Tex13b	9.34161	8.29638	1.04522	0.001	0.015
IL12mRNA.24hr.05/NS.CTL.24hr.5	Tfrc	6.20386	4.60185	1.60201	0	0
IL12mRNA.24hr.05/NS.CTL.24hr.5	Thrap3	8.15014	6.93006	1.22008	0.001	0.015
IL12mRNA.24hr.05/NS.CTL.24hr.5	Tmem206	6.28434	5.25806	1.02627	0	0
IL12mRNA.24hr.05/NS.CTL.24hr.5	Tnxb	5.71802	7.23017	-1.51215	0.002	0.024
IL12mRNA.24hr.05/NS.CTL.24hr.5	Trim30a	10.2275	8.78311	1.44438	0	0
IL12mRNA.24hr.05/NS.CTL.24hr.5	Trove2	7.37954	6.17405	1.20549	0	0
IL12mRNA.24hr.05/NS.CTL.24hr.5	Ttc14	5.81366	4.69074	1.12293	0.001	0.015
IL12mRNA.24hr.05/NS.CTL.24hr.5	Tti2	7.2784	6.14725	1.13114	0.002	0.024
IL12mRNA.24hr.05/NS.CTL.24hr.5	Ubd	9.54531	8.50305	1.04226	0.003	0.03
IL12mRNA.24hr.05/NS.CTL.24hr.5	Usp34	8.33687	7.3213	1.01557	0.004	0.036
IL12mRNA.24hr.05/NS.CTL.24hr.5	Vma21	8.58637	7.55326	1.03312	0.006	0.045
IL12mRNA.24hr.05/NS.CTL.24hr.5	Vps13b	6.79604	5.70303	1.09301	0	0
IL12mRNA.24hr.05/NS.CTL.24hr.5	Wfdc21	5.02593	6.66967	-1.64374	0.001	0.015
IL12mRNA.24hr.05/NS.CTL.24hr.5	Wnk1	9.9217	8.77059	1.15111	0	0
IL12mRNA.24hr.05/NS.CTL.24hr.5	Xiap	6.53773	4.89334	1.64438	0	0
IL12mRNA.24hr.05/NS.CTL.24hr.5	Zc3h13	6.86287	5.61294	1.24993	0.003	0.03
IL12mRNA.24hr.05/NS.CTL.24hr.5	Zfp266	5.73373	4.46204	1.27169	0	0
IL12mRNA.24hr.05/NS.CTL.24hr.5	Zfp36l1	10.2861	9.23793	1.04815	0.002	0.024
IL12mRNA.24hr.05/NS.CTL.24hr.5	Zfp800	6.01498	4.72365	1.29132	0.001	0.015
IL12mRNA.24hr.05/NS.CTL.24hr.5	Zfp871	7.70513	6.59086	1.11428	0	0
IL12mRNA.7d.05/NS.CTL.7d.5	1500015O10Rik	5.7273	7.22214	-1.49485	0	0
IL12mRNA.7d.05/NS.CTL.7d.5	1700018B24Rik	5.92462	7.31253	-1.38791	0.002	0.006
IL12mRNA.7d.05/NS.CTL.7d.5	1700097N02Rik	4.08574	3.04031	1.04544	0	0
IL12mRNA.7d.05/NS.CTL.7d.5	1810032O08Rik	6.89805	7.92744	-1.02939	0.006	0.014
IL12mRNA.7d.05/NS.CTL.7d.5	2210406H18Rik	5.01207	3.90848	1.1036	0	0
IL12mRNA.7d.05/NS.CTL.7d.5	2700081O15Rik	6.27766	7.55598	-1.27832	0	0
IL12mRNA.7d.05/NS.CTL.7d.5	2810021J22Rik	5.81377	6.83273	-1.01896	0	0
IL12mRNA.7d.05/NS.CTL.7d.5	2810039B14Rik	4.44681	5.53652	-1.08971	0	0
IL12mRNA.7d.05/NS.CTL.7d.5	2810408I11Rik	7.09295	8.11111	-1.01816	0	0
IL12mRNA.7d.05/NS.CTL.7d.5	2900076A13Rik	5.6147	4.55298	1.06172	0.001	0.003
IL12mRNA.7d.05/NS.CTL.7d.5	4930422N03Rik	5.1217	6.13708	-1.01538	0.001	0.003
IL12mRNA.7d.05/NS.CTL.7d.5	4930428B01Rik	6.69924	7.80472	-1.10548	0.013	0.026
IL12mRNA.7d.05/NS.CTL.7d.5	4930503L19Rik	6.04923	7.23911	-1.18988	0.002	0.006
IL12mRNA.7d.05/NS.CTL.7d.5	4930523C07Rik	6.46992	5.46439	1.00553	0	0
IL12mRNA.7d.05/NS.CTL.7d.5	4930579G24Rik	7.49292	8.93543	-1.44251	0.011	0.023
IL12mRNA.7d.05/NS.CTL.7d.5	5430435K18Rik	5.61588	6.80761	-1.19173	0	0
IL12mRNA.7d.05/NS.CTL.7d.5	5830407E08Rik	4.86094	3.73504	1.1259	0	0
IL12mRNA.7d.05/NS.CTL.7d.5	5830411N06Rik	6.42637	4.83145	1.59492	0	0
IL12mRNA.7d.05/NS.CTL.7d.5	5830453J16Rik	3.96844	2.8736	1.09484	0	0
IL12mRNA.7d.05/NS.CTL.7d.5	6330403K07Rik	5.2379	4.20102	1.03688	0	0
IL12mRNA.7d.05/NS.CTL.7d.5	6820445E23Rik	5.79879	6.8179	-1.01911	0	0
IL12mRNA.7d.05/NS.CTL.7d.5	9230108I15Rik	7.09255	8.15672	-1.06417	0.001	0.003
IL12mRNA.7d.05/NS.CTL.7d.5	9430012M22Rik	6.23649	7.26372	-1.02723	0	0
IL12mRNA.7d.05/NS.CTL.7d.5	9930012K11Rik	5.93202	6.9404	-1.00839	0	0
IL12mRNA.7d.05/NS.CTL.7d.5	A030007N12Rik	5.18008	6.18421	-1.00413	0.003	0.008
IL12mRNA.7d.05/NS.CTL.7d.5	A130071D04Rik	7.30873	5.81422	1.4945	0.002	0.006
IL12mRNA.7d.05/NS.CTL.7d.5	A230059L01Rik	3.85774	5.09969	-1.24195	0	0
IL12mRNA.7d.05/NS.CTL.7d.5	A2m	5.52773	4.40986	1.11786	0	0
IL12mRNA.7d.05/NS.CTL.7d.5	A430093F15Rik	5.09656	4.04857	1.04799	0	0
IL12mRNA.7d.05/NS.CTL.7d.5	A630081D01Rik	6.50479	5.26371	1.24108	0	0
IL12mRNA.7d.05/NS.CTL.7d.5	A830082K12Rik	4.49204	5.85144	-1.35941	0	0
IL12mRNA.7d.05/NS.CTL.7d.5	A930004D18Rik	4.83149	6.02665	-1.19516	0	0
IL12mRNA.7d.05/NS.CTL.7d.5	A930035D04Rik	6.58063	7.7402	-1.15957	0.002	0.006
IL12mRNA.7d.05/NS.CTL.7d.5	AA467197	11.093	9.45371	1.63933	0	0
IL12mRNA.7d.05/NS.CTL.7d.5	AB124611	9.13998	6.5988	2.54117	0	0
IL12mRNA.7d.05/NS.CTL.7d.5	AI256396	5.06157	3.89857	1.163	0.001	0.003
IL12mRNA.7d.05/NS.CTL.7d.5	AI429363	6.89583	5.86059	1.03523	0	0
IL12mRNA.7d.05/NS.CTL.7d.5	AI504432	7.3733	5.66779	1.70551	0	0
IL12mRNA.7d.05/NS.CTL.7d.5	AI661384	7.25763	3.45428	3.80334	0	0
IL12mRNA.7d.05/NS.CTL.7d.5	AI790276	8.80093	6.89475	1.90618	0	0
IL12mRNA.7d.05/NS.CTL.7d.5	AU015263	7.97338	6.13775	1.83563	0	0
IL12mRNA.7d.05/NS.CTL.7d.5	AW011738	5.83652	6.93885	-1.10233	0	0
IL12mRNA.7d.05/NS.CTL.7d.5	AW112010	12.8055	10.7381	2.06745	0	0
IL12mRNA.7d.05/NS.CTL.7d.5	AW555355	7.73667	6.64868	1.08799	0	0
IL12mRNA.7d.05/NS.CTL.7d.5	Aasdhppt	5.26849	6.31314	-1.04465	0	0
IL12mRNA.7d.05/NS.CTL.7d.5	Abca1	10.8627	8.9183	1.94442	0	0
IL12mRNA.7d.05/NS.CTL.7d.5	Abca3	7.80126	5.93569	1.86557	0	0
IL12mRNA.7d.05/NS.CTL.7d.5	Abca9	7.32205	5.80703	1.51501	0	0
IL12mRNA.7d.05/NS.CTL.7d.5	Abcc3	7.64112	5.96432	1.6768	0	0
IL12mRNA.7d.05/NS.CTL.7d.5	Abcd2	5.02368	3.81883	1.20485	0	0
IL12mRNA.7d.05/NS.CTL.7d.5	Abcg1	9.2412	7.69982	1.54138	0	0
IL12mRNA.7d.05/NS.CTL.7d.5	Abcg3	5.43816	4.31914	1.11902	0	0
IL12mRNA.7d.05/NS.CTL.7d.5	Abhd6	4.96206	3.8589	1.10316	0	0
IL12mRNA.7d.05/NS.CTL.7d.5	Abi2	8.09807	9.16887	-1.0708	0	0
IL12mRNA.7d.05/NS.CTL.7d.5	Abi3bp	6.98268	4.06583	2.91685	0	0
IL12mRNA.7d.05/NS.CTL.7d.5	Ablim1	8.14236	6.54251	1.59986	0	0
IL12mRNA.7d.05/NS.CTL.7d.5	Abr	8.32349	7.2062	1.11729	0	0
IL12mRNA.7d.05/NS.CTL.7d.5	Ackr1	7.57252	6.06322	1.5093	0	0
IL12mRNA.7d.05/NS.CTL.7d.5	Ackr3	8.43868	7.08761	1.35107	0	0
IL12mRNA.7d.05/NS.CTL.7d.5	Acod1	10.8901	7.15159	3.73855	0	0
IL12mRNA.7d.05/NS.CTL.7d.5	Acp5	9.10309	7.94305	1.16004	0	0
IL12mRNA.7d.05/NS.CTL.7d.5	Acsl1	8.11227	6.3471	1.76517	0	0
IL12mRNA.7d.05/NS.CTL.7d.5	Acsl3	6.01346	7.5152	-1.50174	0	0
IL12mRNA.7d.05/NS.CTL.7d.5	Acta2	10.027	8.50053	1.52651	0.001	0.003
IL12mRNA.7d.05/NS.CTL.7d.5	Adam19	7.24834	5.93373	1.31461	0	0
IL12mRNA.7d.05/NS.CTL.7d.5	Adam8	10.6748	9.2042	1.4706	0	0
IL12mRNA.7d.05/NS.CTL.7d.5	Adamts15	6.34948	4.78486	1.56462	0	0
IL12mRNA.7d.05/NS.CTL.7d.5	Adamts2	7.85472	6.00759	1.84713	0	0
IL12mRNA.7d.05/NS.CTL.7d.5	Adamts5	7.66932	5.77746	1.89187	0	0
IL12mRNA.7d.05/NS.CTL.7d.5	Adamtsl1	4.42913	3.17864	1.25049	0.002	0.006
IL12mRNA.7d.05/NS.CTL.7d.5	Adap2	8.69939	6.87296	1.82643	0	0
IL12mRNA.7d.05/NS.CTL.7d.5	Adgb	4.17024	3.02781	1.14243	0	0
IL12mRNA.7d.05/NS.CTL.7d.5	Adgrd1	7.95219	6.04519	1.907	0	0
IL12mRNA.7d.05/NS.CTL.7d.5	Adgre1	10.0991	8.40347	1.69565	0	0
IL12mRNA.7d.05/NS.CTL.7d.5	Adgre4	5.71799	4.00304	1.71495	0	0
IL12mRNA.7d.05/NS.CTL.7d.5	Adgre5	8.7687	6.21966	2.54903	0	0
IL12mRNA.7d.05/NS.CTL.7d.5	Adgrg5	7.05368	6.01982	1.03386	0	0
IL12mRNA.7d.05/NS.CTL.7d.5	Adgrl1	7.20208	8.32382	-1.12174	0.005	0.012
IL12mRNA.7d.05/NS.CTL.7d.5	Adhfe1	6.86207	5.31086	1.55121	0.002	0.006
IL12mRNA.7d.05/NS.CTL.7d.5	Adig	6.32924	4.93734	1.39191	0	0
IL12mRNA.7d.05/NS.CTL.7d.5	Adipoq	10.7185	6.29957	4.41893	0.001	0.003
IL12mRNA.7d.05/NS.CTL.7d.5	Adm	7.70276	6.57925	1.12351	0	0
IL12mRNA.7d.05/NS.CTL.7d.5	Adora1	4.64534	3.55223	1.09311	0.011	0.023
IL12mRNA.7d.05/NS.CTL.7d.5	Adrb3	6.59111	4.70908	1.88203	0	0
IL12mRNA.7d.05/NS.CTL.7d.5	Adssl1	8.19873	6.56369	1.63503	0	0
IL12mRNA.7d.05/NS.CTL.7d.5	Afp	7.49572	8.55395	-1.05823	0	0
IL12mRNA.7d.05/NS.CTL.7d.5	Agmo	4.97311	3.93601	1.0371	0.003	0.008
IL12mRNA.7d.05/NS.CTL.7d.5	Ago4	4.77032	3.72177	1.04855	0	0
IL12mRNA.7d.05/NS.CTL.7d.5	Agtr1a	6.0151	4.52845	1.48665	0.002	0.006
IL12mRNA.7d.05/NS.CTL.7d.5	Aif1	10.8945	8.62252	2.27203	0	0
IL12mRNA.7d.05/NS.CTL.7d.5	Alas2	6.39834	4.87974	1.51861	0	0
IL12mRNA.7d.05/NS.CTL.7d.5	Aldh1a1	5.34383	3.86973	1.4741	0	0
IL12mRNA.7d.05/NS.CTL.7d.5	Aldh1a2	6.05875	4.58039	1.47836	0	0
IL12mRNA.7d.05/NS.CTL.7d.5	Aldh1a7	6.01784	4.00422	2.01362	0	0
IL12mRNA.7d.05/NS.CTL.7d.5	Aldh1b1	5.22934	4.17369	1.05565	0	0
IL12mRNA.7d.05/NS.CTL.7d.5	Aldoc	7.82394	6.69781	1.12613	0	0
IL12mRNA.7d.05/NS.CTL.7d.5	Alg6	6.33429	7.71738	-1.38309	0	0
IL12mRNA.7d.05/NS.CTL.7d.5	Alox5ap	10.9037	9.74291	1.16077	0	0
IL12mRNA.7d.05/NS.CTL.7d.5	Amot	8.08725	9.29076	-1.20351	0.001	0.003
IL12mRNA.7d.05/NS.CTL.7d.5	Ampd3	8.90163	6.1496	2.75203	0	0
IL12mRNA.7d.05/NS.CTL.7d.5	Ankrd33b	5.68381	4.30518	1.37862	0	0
IL12mRNA.7d.05/NS.CTL.7d.5	Ankrd37	8.15516	9.68333	-1.52817	0	0
IL12mRNA.7d.05/NS.CTL.7d.5	Ankrd52	5.86695	6.94189	-1.07495	0.001	0.003
IL12mRNA.7d.05/NS.CTL.7d.5	Ankrd66	5.7219	4.67596	1.04594	0	0
IL12mRNA.7d.05/NS.CTL.7d.5	Anpep	8.71371	7.69435	1.01936	0	0
IL12mRNA.7d.05/NS.CTL.7d.5	Anxa6	7.38795	5.35156	2.0364	0	0
IL12mRNA.7d.05/NS.CTL.7d.5	Anxa8	6.80077	5.30894	1.49183	0	0
IL12mRNA.7d.05/NS.CTL.7d.5	Aoah	7.61419	5.22073	2.39346	0	0
IL12mRNA.7d.05/NS.CTL.7d.5	Aoc3	7.62193	5.23575	2.38618	0	0
IL12mRNA.7d.05/NS.CTL.7d.5	Ap1s2	8.68984	7.48832	1.20152	0	0
IL12mRNA.7d.05/NS.CTL.7d.5	Aplnr	9.5835	7.52181	2.06168	0.014	0.028
IL12mRNA.7d.05/NS.CTL.7d.5	Apobec1	10.0441	8.98227	1.06181	0	0
IL12mRNA.7d.05/NS.CTL.7d.5	Apobr	7.46365	6.22871	1.23495	0	0
IL12mRNA.7d.05/NS.CTL.7d.5	Apoc1	8.17929	6.36566	1.81363	0	0
IL12mRNA.7d.05/NS.CTL.7d.5	Apoc2	7.95381	6.20321	1.7506	0	0
IL12mRNA.7d.05/NS.CTL.7d.5	Apoe	11.6338	10.2041	1.42962	0	0
IL12mRNA.7d.05/NS.CTL.7d.5	Apol6	8.44629	7.07619	1.3701	0	0
IL12mRNA.7d.05/NS.CTL.7d.5	Appbp2	6.7421	7.75378	-1.01168	0.002	0.006
IL12mRNA.7d.05/NS.CTL.7d.5	Aqp1	8.71697	9.82624	-1.10926	0	0
IL12mRNA.7d.05/NS.CTL.7d.5	Arg1	11.6674	7.35385	4.31351	0	0
IL12mRNA.7d.05/NS.CTL.7d.5	Arg2	5.98539	3.92159	2.0638	0	0
IL12mRNA.7d.05/NS.CTL.7d.5	Arhgap15	6.56439	4.5009	2.06349	0	0
IL12mRNA.7d.05/NS.CTL.7d.5	Arhgap25	7.39932	5.93099	1.46833	0	0
IL12mRNA.7d.05/NS.CTL.7d.5	Arhgap26	6.73222	5.06361	1.66861	0	0
IL12mRNA.7d.05/NS.CTL.7d.5	Arhgap4	6.74684	5.49767	1.24918	0	0
IL12mRNA.7d.05/NS.CTL.7d.5	Arhgap45	7.54979	6.2476	1.30219	0	0
IL12mRNA.7d.05/NS.CTL.7d.5	Arhgap5	5.3286	6.40052	-1.07193	0	0
IL12mRNA.7d.05/NS.CTL.7d.5	Arhgdib	11.5576	9.47344	2.08415	0	0
IL12mRNA.7d.05/NS.CTL.7d.5	Arhgef6	8.90109	7.57881	1.32228	0	0
IL12mRNA.7d.05/NS.CTL.7d.5	Arl6ip1	10.1832	8.10842	2.0748	0	0
IL12mRNA.7d.05/NS.CTL.7d.5	Arrdc4	6.37146	4.64442	1.72704	0	0
IL12mRNA.7d.05/NS.CTL.7d.5	Arsj	5.35276	6.70024	-1.34748	0	0
IL12mRNA.7d.05/NS.CTL.7d.5	Asph	7.02704	8.11491	-1.08787	0.005	0.012
IL12mRNA.7d.05/NS.CTL.7d.5	Atf2	7.10527	8.23737	-1.13211	0.009	0.019
IL12mRNA.7d.05/NS.CTL.7d.5	Atf3	8.92899	7.61752	1.31148	0	0
IL12mRNA.7d.05/NS.CTL.7d.5	Atp13a2	8.84332	7.38596	1.45736	0	0
IL12mRNA.7d.05/NS.CTL.7d.5	Atp1a2	7.55883	5.1268	2.43203	0.002	0.006
IL12mRNA.7d.05/NS.CTL.7d.5	Atp23	6.62582	7.79145	-1.16563	0.004	0.01
IL12mRNA.7d.05/NS.CTL.7d.5	Atp8a1	7.53239	5.79338	1.73901	0	0
IL12mRNA.7d.05/NS.CTL.7d.5	Atp8b4	8.10445	6.4327	1.67175	0	0
IL12mRNA.7d.05/NS.CTL.7d.5	Auts2	4.73819	3.5984	1.13979	0	0
IL12mRNA.7d.05/NS.CTL.7d.5	B230217C12Rik	5.86254	7.18859	-1.32605	0	0
IL12mRNA.7d.05/NS.CTL.7d.5	B230307C23Rik	6.19019	7.73559	-1.5454	0.001	0.003
IL12mRNA.7d.05/NS.CTL.7d.5	B3galnt1	5.85529	4.02581	1.82947	0	0
IL12mRNA.7d.05/NS.CTL.7d.5	B3gnt3	6.23773	7.27954	-1.04182	0	0
IL12mRNA.7d.05/NS.CTL.7d.5	B3gnt5	5.76881	4.36236	1.40645	0	0
IL12mRNA.7d.05/NS.CTL.7d.5	B3gnt9	6.60921	7.83757	-1.22837	0	0
IL12mRNA.7d.05/NS.CTL.7d.5	B430306N03Rik	7.362	6.10357	1.25842	0	0
IL12mRNA.7d.05/NS.CTL.7d.5	BB045044	4.67661	3.52087	1.15574	0	0
IL12mRNA.7d.05/NS.CTL.7d.5	BB144871	7.35191	4.04347	3.30844	0	0
IL12mRNA.7d.05/NS.CTL.7d.5	BC035044	5.12076	4.01307	1.10769	0.002	0.006
IL12mRNA.7d.05/NS.CTL.7d.5	BC038331	5.75312	6.77375	-1.02063	0	0
IL12mRNA.7d.05/NS.CTL.7d.5	Baiap2	8.20165	9.34498	-1.14333	0	0
IL12mRNA.7d.05/NS.CTL.7d.5	Baiap3	5.62943	4.42296	1.20647	0	0
IL12mRNA.7d.05/NS.CTL.7d.5	Basp1	11.1004	9.59205	1.50837	0	0
IL12mRNA.7d.05/NS.CTL.7d.5	Batf	7.91953	6.55349	1.36605	0	0
IL12mRNA.7d.05/NS.CTL.7d.5	Batf2	9.56857	8.28524	1.28333	0	0
IL12mRNA.7d.05/NS.CTL.7d.5	Batf3	7.42776	6.35822	1.06954	0	0
IL12mRNA.7d.05/NS.CTL.7d.5	Bcas1	5.81026	7.51263	-1.70237	0	0
IL12mRNA.7d.05/NS.CTL.7d.5	Bcl11b	7.4283	5.04232	2.38598	0	0
IL12mRNA.7d.05/NS.CTL.7d.5	Bdh1	5.44826	4.04097	1.40729	0.001	0.003
IL12mRNA.7d.05/NS.CTL.7d.5	Bdnf	4.88066	6.08785	-1.20719	0	0
IL12mRNA.7d.05/NS.CTL.7d.5	Bgn	11.6891	9.38986	2.29928	0	0
IL12mRNA.7d.05/NS.CTL.7d.5	Bicc1	6.42194	5.25178	1.17016	0	0
IL12mRNA.7d.05/NS.CTL.7d.5	Bmf	5.39762	6.62513	-1.2275	0.005	0.012
IL12mRNA.7d.05/NS.CTL.7d.5	Bmper	7.10729	5.23467	1.87262	0	0
IL12mRNA.7d.05/NS.CTL.7d.5	Bmt2	7.66417	8.7575	-1.09333	0.002	0.006
IL12mRNA.7d.05/NS.CTL.7d.5	Brinp3	6.6963	8.6072	-1.91091	0	0
IL12mRNA.7d.05/NS.CTL.7d.5	Brix1	5.71055	6.86412	-1.15357	0	0
IL12mRNA.7d.05/NS.CTL.7d.5	Bscl2	10.0391	8.18512	1.85394	0	0
IL12mRNA.7d.05/NS.CTL.7d.5	Bst1	9.42747	5.2835	4.14396	0	0
IL12mRNA.7d.05/NS.CTL.7d.5	Btk	7.40357	6.14765	1.25593	0	0
IL12mRNA.7d.05/NS.CTL.7d.5	Btla	5.97067	4.6061	1.36456	0.003	0.008
IL12mRNA.7d.05/NS.CTL.7d.5	C1qa	12.6817	11.2294	1.45238	0	0
IL12mRNA.7d.05/NS.CTL.7d.5	C1qb	11.6614	9.53035	2.13108	0	0
IL12mRNA.7d.05/NS.CTL.7d.5	C1qc	12.2431	10.4807	1.76245	0	0
IL12mRNA.7d.05/NS.CTL.7d.5	C1qtnf1	6.98783	5.9767	1.01113	0	0
IL12mRNA.7d.05/NS.CTL.7d.5	C1ra	9.69543	8.38703	1.3084	0	0
IL12mRNA.7d.05/NS.CTL.7d.5	C1s1	10.5942	8.13672	2.45744	0	0
IL12mRNA.7d.05/NS.CTL.7d.5	C2	9.06844	7.2528	1.81564	0	0
IL12mRNA.7d.05/NS.CTL.7d.5	C3	11.9261	8.0694	3.85674	0	0
IL12mRNA.7d.05/NS.CTL.7d.5	C5ar1	7.39469	5.5312	1.86349	0	0
IL12mRNA.7d.05/NS.CTL.7d.5	C6	7.26051	5.29756	1.96295	0	0
IL12mRNA.7d.05/NS.CTL.7d.5	Cacna2d1	7.17698	8.52006	-1.34309	0.007	0.016
IL12mRNA.7d.05/NS.CTL.7d.5	Cadm1	7.7098	6.43504	1.27476	0.006	0.014
IL12mRNA.7d.05/NS.CTL.7d.5	Camk2a	6.17022	7.22147	-1.05125	0.004	0.01
IL12mRNA.7d.05/NS.CTL.7d.5	Camk4	5.07572	3.44849	1.62724	0	0
IL12mRNA.7d.05/NS.CTL.7d.5	Camkmt	5.62973	6.87367	-1.24395	0.007	0.016
IL12mRNA.7d.05/NS.CTL.7d.5	Cand2	6.29871	7.76833	-1.46962	0	0
IL12mRNA.7d.05/NS.CTL.7d.5	Car3	12.322	8.46518	3.8568	0.008	0.018
IL12mRNA.7d.05/NS.CTL.7d.5	Car4	5.9377	4.24314	1.69456	0	0
IL12mRNA.7d.05/NS.CTL.7d.5	Car5b	4.88817	3.78758	1.1006	0.001	0.003
IL12mRNA.7d.05/NS.CTL.7d.5	Card19	8.65485	7.49314	1.16171	0	0
IL12mRNA.7d.05/NS.CTL.7d.5	Casp3	6.43657	7.82972	-1.39314	0.01	0.021
IL12mRNA.7d.05/NS.CTL.7d.5	Catsperz	4.41809	5.57497	-1.15688	0.007	0.016
IL12mRNA.7d.05/NS.CTL.7d.5	Cavin2	7.57414	5.95493	1.61921	0.001	0.003
IL12mRNA.7d.05/NS.CTL.7d.5	Cbr2	9.2574	6.04752	3.20988	0	0
IL12mRNA.7d.05/NS.CTL.7d.5	Cc2d2a	6.41472	7.46814	-1.05341	0.002	0.006
IL12mRNA.7d.05/NS.CTL.7d.5	Ccdc120	5.24596	6.27022	-1.02427	0.001	0.003
IL12mRNA.7d.05/NS.CTL.7d.5	Ccdc28b	5.60094	4.21029	1.39065	0	0
IL12mRNA.7d.05/NS.CTL.7d.5	Ccdc69	5.17125	3.90636	1.26488	0	0
IL12mRNA.7d.05/NS.CTL.7d.5	Ccdc80	9.62549	7.48704	2.13846	0.001	0.003
IL12mRNA.7d.05/NS.CTL.7d.5	Ccdc88b	7.14709	5.41886	1.72823	0	0
IL12mRNA.7d.05/NS.CTL.7d.5	Ccl11	8.8395	5.30769	3.53181	0	0
IL12mRNA.7d.05/NS.CTL.7d.5	Ccl5	11.8702	10.7455	1.12463	0	0
IL12mRNA.7d.05/NS.CTL.7d.5	Ccl6	9.8753	6.50885	3.36645	0	0
IL12mRNA.7d.05/NS.CTL.7d.5	Ccl8	12.7314	9.06891	3.66246	0	0
IL12mRNA.7d.05/NS.CTL.7d.5	Ccl9	10.5282	8.24644	2.28179	0	0
IL12mRNA.7d.05/NS.CTL.7d.5	Ccne2	7.59163	8.8282	-1.23658	0	0
IL12mRNA.7d.05/NS.CTL.7d.5	Ccny	4.10937	5.48403	-1.37466	0	0
IL12mRNA.7d.05/NS.CTL.7d.5	Ccr1	5.05982	3.72502	1.3348	0	0
IL12mRNA.7d.05/NS.CTL.7d.5	Ccr2	7.97202	6.76489	1.20713	0.001	0.003
IL12mRNA.7d.05/NS.CTL.7d.5	Ccr5	9.60574	7.84337	1.76237	0	0
IL12mRNA.7d.05/NS.CTL.7d.5	Cct6b	5.73083	7.10908	-1.37825	0	0
IL12mRNA.7d.05/NS.CTL.7d.5	Cd14	9.72989	7.75511	1.97478	0	0
IL12mRNA.7d.05/NS.CTL.7d.5	Cd163	7.85205	5.37575	2.4763	0	0
IL12mRNA.7d.05/NS.CTL.7d.5	Cd180	7.88687	6.85359	1.03328	0	0
IL12mRNA.7d.05/NS.CTL.7d.5	Cd1d1	8.26053	6.44433	1.8162	0	0
IL12mRNA.7d.05/NS.CTL.7d.5	Cd2	7.28876	4.46634	2.82242	0	0
IL12mRNA.7d.05/NS.CTL.7d.5	Cd200r1	6.43106	5.23983	1.19122	0	0
IL12mRNA.7d.05/NS.CTL.7d.5	Cd200r4	7.09612	4.96339	2.13273	0	0
IL12mRNA.7d.05/NS.CTL.7d.5	Cd209f	7.67263	6.08098	1.59165	0	0
IL12mRNA.7d.05/NS.CTL.7d.5	Cd209g	6.66211	4.10324	2.55887	0	0
IL12mRNA.7d.05/NS.CTL.7d.5	Cd247	6.18837	4.29256	1.8958	0	0
IL12mRNA.7d.05/NS.CTL.7d.5	Cd24a	8.37681	5.25525	3.12157	0	0
IL12mRNA.7d.05/NS.CTL.7d.5	Cd274	10.5505	8.11282	2.43769	0	0
IL12mRNA.7d.05/NS.CTL.7d.5	Cd28	5.54585	3.52839	2.01746	0.001	0.003
IL12mRNA.7d.05/NS.CTL.7d.5	Cd300a	9.3055	6.84166	2.46384	0	0
IL12mRNA.7d.05/NS.CTL.7d.5	Cd300c2	9.84244	8.32554	1.5169	0	0
IL12mRNA.7d.05/NS.CTL.7d.5	Cd300lb	6.34581	4.57706	1.76875	0.002	0.006
IL12mRNA.7d.05/NS.CTL.7d.5	Cd300ld	8.38608	6.58887	1.79721	0	0
IL12mRNA.7d.05/NS.CTL.7d.5	Cd300lf	8.93184	6.99905	1.93279	0	0
IL12mRNA.7d.05/NS.CTL.7d.5	Cd302	10.0921	7.02458	3.06749	0	0
IL12mRNA.7d.05/NS.CTL.7d.5	Cd36	9.61109	6.00581	3.60528	0	0
IL12mRNA.7d.05/NS.CTL.7d.5	Cd37	8.41578	6.80151	1.61427	0	0
IL12mRNA.7d.05/NS.CTL.7d.5	Cd38	6.99809	5.1608	1.83729	0.001	0.003
IL12mRNA.7d.05/NS.CTL.7d.5	Cd3d	9.26756	6.22879	3.03877	0	0
IL12mRNA.7d.05/NS.CTL.7d.5	Cd3e	8.35114	6.20369	2.14745	0	0
IL12mRNA.7d.05/NS.CTL.7d.5	Cd3g	8.64633	4.88262	3.76371	0	0
IL12mRNA.7d.05/NS.CTL.7d.5	Cd40	8.24034	6.97712	1.26322	0	0
IL12mRNA.7d.05/NS.CTL.7d.5	Cd48	9.27197	8.1309	1.14107	0.002	0.006
IL12mRNA.7d.05/NS.CTL.7d.5	Cd5	5.72907	3.90608	1.82299	0	0
IL12mRNA.7d.05/NS.CTL.7d.5	Cd52	12.1302	10.2693	1.86089	0	0
IL12mRNA.7d.05/NS.CTL.7d.5	Cd53	11.249	9.14996	2.09908	0	0
IL12mRNA.7d.05/NS.CTL.7d.5	Cd55	5.05647	3.48793	1.56854	0	0
IL12mRNA.7d.05/NS.CTL.7d.5	Cd5l	6.94985	5.39406	1.55579	0.001	0.003
IL12mRNA.7d.05/NS.CTL.7d.5	Cd6	6.66316	5.43751	1.22566	0	0
IL12mRNA.7d.05/NS.CTL.7d.5	Cd68	11.3181	9.4016	1.91647	0	0
IL12mRNA.7d.05/NS.CTL.7d.5	Cd74	13.0512	10.1162	2.93497	0	0
IL12mRNA.7d.05/NS.CTL.7d.5	Cd84	9.38155	7.27732	2.10422	0	0
IL12mRNA.7d.05/NS.CTL.7d.5	Cd86	7.43728	5.95775	1.47953	0	0
IL12mRNA.7d.05/NS.CTL.7d.5	Cd8a	8.18765	4.69081	3.49684	0	0
IL12mRNA.7d.05/NS.CTL.7d.5	Cd8b1	8.6048	4.82537	3.77942	0	0
IL12mRNA.7d.05/NS.CTL.7d.5	Cd96	6.13193	4.96068	1.17126	0	0
IL12mRNA.7d.05/NS.CTL.7d.5	Cdc14b	6.98278	8.09776	-1.11499	0.01	0.021
IL12mRNA.7d.05/NS.CTL.7d.5	Cdc42ep3	7.24393	5.72338	1.52055	0	0
IL12mRNA.7d.05/NS.CTL.7d.5	Cdh11	6.90031	4.95868	1.94163	0.003	0.008
IL12mRNA.7d.05/NS.CTL.7d.5	Cdk6	5.12298	6.13929	-1.01632	0	0
IL12mRNA.7d.05/NS.CTL.7d.5	Cdkn3	8.33029	9.35804	-1.02776	0	0
IL12mRNA.7d.05/NS.CTL.7d.5	Cdo1	7.20849	5.13389	2.07461	0.001	0.003
IL12mRNA.7d.05/NS.CTL.7d.5	Cds1	4.70037	3.69681	1.00356	0	0
IL12mRNA.7d.05/NS.CTL.7d.5	Ceacam1	5.86593	4.75881	1.10712	0	0
IL12mRNA.7d.05/NS.CTL.7d.5	Cebpa	9.18623	7.41603	1.7702	0	0
IL12mRNA.7d.05/NS.CTL.7d.5	Cebpb	10.3587	9.08322	1.2755	0	0
IL12mRNA.7d.05/NS.CTL.7d.5	Cebpd	8.88139	7.47985	1.40155	0	0
IL12mRNA.7d.05/NS.CTL.7d.5	Celf2	8.706	7.12765	1.57835	0.003	0.008
IL12mRNA.7d.05/NS.CTL.7d.5	Cenpe	6.17401	7.67757	-1.50356	0.007	0.016
IL12mRNA.7d.05/NS.CTL.7d.5	Cenpk	7.9909	9.35659	-1.36569	0	0
IL12mRNA.7d.05/NS.CTL.7d.5	Cenpl	6.26516	7.48535	-1.22019	0	0
IL12mRNA.7d.05/NS.CTL.7d.5	Cenpp	6.55907	7.61644	-1.05737	0	0
IL12mRNA.7d.05/NS.CTL.7d.5	Cenpu	7.15327	8.27278	-1.11952	0.011	0.023
IL12mRNA.7d.05/NS.CTL.7d.5	Cenpw	5.26446	6.56925	-1.30479	0	0
IL12mRNA.7d.05/NS.CTL.7d.5	Cers6	8.30617	7.23577	1.0704	0	0
IL12mRNA.7d.05/NS.CTL.7d.5	Cfap61	4.75102	6.02481	-1.27379	0.001	0.003
IL12mRNA.7d.05/NS.CTL.7d.5	Cfap97	6.08394	7.30355	-1.21961	0	0
IL12mRNA.7d.05/NS.CTL.7d.5	Cfb	10.5423	8.04522	2.49706	0	0
IL12mRNA.7d.05/NS.CTL.7d.5	Cfd	11.6848	7.44962	4.2352	0.002	0.006
IL12mRNA.7d.05/NS.CTL.7d.5	Cfh	4.40654	3.14152	1.26502	0	0
IL12mRNA.7d.05/NS.CTL.7d.5	Cfp	10.305	7.89032	2.41468	0	0
IL12mRNA.7d.05/NS.CTL.7d.5	Chac2	7.77703	8.9011	-1.12406	0.001	0.003
IL12mRNA.7d.05/NS.CTL.7d.5	Chchd10	8.58577	7.1489	1.43687	0	0
IL12mRNA.7d.05/NS.CTL.7d.5	Chic1	5.47492	7.11182	-1.6369	0	0
IL12mRNA.7d.05/NS.CTL.7d.5	Chil3	9.07113	7.04774	2.02339	0.001	0.003
IL12mRNA.7d.05/NS.CTL.7d.5	Chl1	7.24463	3.81158	3.43305	0	0
IL12mRNA.7d.05/NS.CTL.7d.5	Chml	6.83267	7.85667	-1.024	0	0
IL12mRNA.7d.05/NS.CTL.7d.5	Chp2	4.17549	3.09521	1.08028	0.002	0.006
IL12mRNA.7d.05/NS.CTL.7d.5	Chrdl1	4.4567	3.03782	1.41889	0	0
IL12mRNA.7d.05/NS.CTL.7d.5	Chst15	6.88151	5.63299	1.24851	0	0
IL12mRNA.7d.05/NS.CTL.7d.5	Churc1	8.08914	6.45083	1.6383	0	0
IL12mRNA.7d.05/NS.CTL.7d.5	Cidec	7.397	4.30957	3.08744	0	0
IL12mRNA.7d.05/NS.CTL.7d.5	Ciita	7.10417	4.34514	2.75903	0	0
IL12mRNA.7d.05/NS.CTL.7d.5	Cilp	8.58361	10.8986	-2.31503	0	0
IL12mRNA.7d.05/NS.CTL.7d.5	Ckb	9.05606	7.45069	1.60537	0	0
IL12mRNA.7d.05/NS.CTL.7d.5	Cldn34c1	5.12246	6.58724	-1.46479	0	0
IL12mRNA.7d.05/NS.CTL.7d.5	Clec10a	8.33272	5.25981	3.07292	0	0
IL12mRNA.7d.05/NS.CTL.7d.5	Clec3b	6.12672	4.61011	1.5166	0	0
IL12mRNA.7d.05/NS.CTL.7d.5	Clec4a2	8.64693	7.38241	1.26452	0	0
IL12mRNA.7d.05/NS.CTL.7d.5	Clec4a3	9.17074	7.50794	1.6628	0	0
IL12mRNA.7d.05/NS.CTL.7d.5	Clec4d	10.4614	6.03516	4.42622	0	0
IL12mRNA.7d.05/NS.CTL.7d.5	Clec4e	9.57653	5.75425	3.82228	0	0
IL12mRNA.7d.05/NS.CTL.7d.5	Clec4n	8.34417	5.94413	2.40004	0	0
IL12mRNA.7d.05/NS.CTL.7d.5	Clec5a	6.72217	5.51079	1.21138	0.001	0.003
IL12mRNA.7d.05/NS.CTL.7d.5	Clec7a	9.63658	7.2336	2.40298	0	0
IL12mRNA.7d.05/NS.CTL.7d.5	Clic5	4.79973	3.29187	1.50786	0	0
IL12mRNA.7d.05/NS.CTL.7d.5	Cln3	7.30694	5.5931	1.71384	0	0
IL12mRNA.7d.05/NS.CTL.7d.5	Cma1	6.53293	4.70409	1.82884	0	0
IL12mRNA.7d.05/NS.CTL.7d.5	Cmah	5.92795	4.8436	1.08435	0	0
IL12mRNA.7d.05/NS.CTL.7d.5	Cmklr1	7.89999	6.16517	1.73483	0	0
IL12mRNA.7d.05/NS.CTL.7d.5	Cmpk2	7.71217	9.2663	-1.55412	0	0
IL12mRNA.7d.05/NS.CTL.7d.5	Cndp2	11.3701	9.66661	1.70346	0	0
IL12mRNA.7d.05/NS.CTL.7d.5	Cnih2	5.64858	6.74208	-1.0935	0	0
IL12mRNA.7d.05/NS.CTL.7d.5	Cntn3	7.97707	9.32876	-1.3517	0.001	0.003
IL12mRNA.7d.05/NS.CTL.7d.5	Col11a1	4.26151	5.66951	-1.408	0	0
IL12mRNA.7d.05/NS.CTL.7d.5	Col12a1	7.15859	5.97907	1.17953	0.01	0.021
IL12mRNA.7d.05/NS.CTL.7d.5	Col14a1	8.60056	6.52752	2.07304	0	0
IL12mRNA.7d.05/NS.CTL.7d.5	Col1a2	11.7069	9.7754	1.93145	0.002	0.006
IL12mRNA.7d.05/NS.CTL.7d.5	Col27a1	7.51459	8.86515	-1.35056	0	0
IL12mRNA.7d.05/NS.CTL.7d.5	Col4a5	6.65882	8.22719	-1.56837	0	0
IL12mRNA.7d.05/NS.CTL.7d.5	Col5a2	11.1336	9.27109	1.86249	0	0
IL12mRNA.7d.05/NS.CTL.7d.5	Col6a2	11.3871	12.5874	-1.20028	0	0
IL12mRNA.7d.05/NS.CTL.7d.5	Col9a1	4.54197	6.05247	-1.5105	0	0
IL12mRNA.7d.05/NS.CTL.7d.5	Copa	5.49886	6.65657	-1.15771	0.001	0.003
IL12mRNA.7d.05/NS.CTL.7d.5	Coro1a	10.5301	8.41642	2.11367	0	0
IL12mRNA.7d.05/NS.CTL.7d.5	Coro2a	7.56514	6.1314	1.43374	0	0
IL12mRNA.7d.05/NS.CTL.7d.5	Cotl1	9.64137	8.04099	1.60038	0	0
IL12mRNA.7d.05/NS.CTL.7d.5	Cp	9.33108	7.9084	1.42268	0	0
IL12mRNA.7d.05/NS.CTL.7d.5	Cpa3	6.67753	4.98365	1.69389	0.003	0.008
IL12mRNA.7d.05/NS.CTL.7d.5	Cpm	4.28233	2.95866	1.32367	0	0
IL12mRNA.7d.05/NS.CTL.7d.5	Cpsf2	5.57264	6.6383	-1.06566	0	0
IL12mRNA.7d.05/NS.CTL.7d.5	Cpxm1	8.95489	5.86876	3.08613	0	0
IL12mRNA.7d.05/NS.CTL.7d.5	Creg1	9.94064	8.50813	1.43251	0	0
IL12mRNA.7d.05/NS.CTL.7d.5	Crip1	11.9685	9.31265	2.65588	0	0
IL12mRNA.7d.05/NS.CTL.7d.5	Crispld2	8.75794	7.40382	1.35413	0	0
IL12mRNA.7d.05/NS.CTL.7d.5	Crybg1	6.78036	4.88411	1.89626	0	0
IL12mRNA.7d.05/NS.CTL.7d.5	Csf1r	12.1956	10.3091	1.88646	0	0
IL12mRNA.7d.05/NS.CTL.7d.5	Csf2ra	8.61133	6.90863	1.7027	0	0
IL12mRNA.7d.05/NS.CTL.7d.5	Csf2rb	8.88907	6.96719	1.92188	0	0
IL12mRNA.7d.05/NS.CTL.7d.5	Csf2rb2	9.43387	6.65116	2.78271	0	0
IL12mRNA.7d.05/NS.CTL.7d.5	Csf3r	7.73033	6.28068	1.44964	0	0
IL12mRNA.7d.05/NS.CTL.7d.5	Csnk2a1	8.32711	9.33542	-1.00831	0.001	0.003
IL12mRNA.7d.05/NS.CTL.7d.5	Cspg4	6.72092	7.88064	-1.15972	0	0
IL12mRNA.7d.05/NS.CTL.7d.5	Cst7	7.64786	6.2675	1.38036	0.002	0.006
IL12mRNA.7d.05/NS.CTL.7d.5	Cstf2	8.77815	9.84255	-1.0644	0.021	0.039
IL12mRNA.7d.05/NS.CTL.7d.5	Ctf1	6.87773	8.19914	-1.32142	0	0
IL12mRNA.7d.05/NS.CTL.7d.5	Ctgf	9.15655	7.73653	1.42002	0.005	0.012
IL12mRNA.7d.05/NS.CTL.7d.5	Ctsb	8.80338	6.74498	2.0584	0	0
IL12mRNA.7d.05/NS.CTL.7d.5	Ctsc	12.8304	11.4568	1.37358	0	0
IL12mRNA.7d.05/NS.CTL.7d.5	Ctse	5.65968	6.89399	-1.23431	0	0
IL12mRNA.7d.05/NS.CTL.7d.5	Ctsf	5.90811	4.89516	1.01295	0	0
IL12mRNA.7d.05/NS.CTL.7d.5	Ctsh	10.5663	8.67608	1.89026	0	0
IL12mRNA.7d.05/NS.CTL.7d.5	Ctss	13.4529	12.1828	1.2701	0	0
IL12mRNA.7d.05/NS.CTL.7d.5	Ctsw	9.48824	6.88406	2.60418	0	0
IL12mRNA.7d.05/NS.CTL.7d.5	Cxcl12	11.2471	6.56271	4.68436	0	0
IL12mRNA.7d.05/NS.CTL.7d.5	Cxcl13	10.6563	5.40192	5.2544	0	0
IL12mRNA.7d.05/NS.CTL.7d.5	Cxcl14	9.00067	5.6719	3.32877	0	0
IL12mRNA.7d.05/NS.CTL.7d.5	Cxcl16	9.93402	7.9828	1.95123	0	0
IL12mRNA.7d.05/NS.CTL.7d.5	Cxcl2	8.49737	5.84981	2.64756	0	0
IL12mRNA.7d.05/NS.CTL.7d.5	Cxcl3	6.31225	3.63504	2.67721	0	0
IL12mRNA.7d.05/NS.CTL.7d.5	Cxcl5	5.8936	3.5625	2.3311	0	0
IL12mRNA.7d.05/NS.CTL.7d.5	Cxcl9	10.2372	7.17125	3.06599	0	0
IL12mRNA.7d.05/NS.CTL.7d.5	Cxcr3	7.64448	5.71676	1.92771	0	0
IL12mRNA.7d.05/NS.CTL.7d.5	Cxcr4	8.32806	7.18859	1.13948	0.003	0.008
IL12mRNA.7d.05/NS.CTL.7d.5	Cxcr6	8.7388	4.62041	4.11839	0	0
IL12mRNA.7d.05/NS.CTL.7d.5	Cyba	11.9568	9.77554	2.18122	0	0
IL12mRNA.7d.05/NS.CTL.7d.5	Cybb	7.8937	5.59287	2.30083	0.001	0.003
IL12mRNA.7d.05/NS.CTL.7d.5	Cyfip2	7.21042	5.47187	1.73855	0	0
IL12mRNA.7d.05/NS.CTL.7d.5	Cygb	7.30998	6.06582	1.24417	0	0
IL12mRNA.7d.05/NS.CTL.7d.5	Cyp1b1	8.71473	5.5466	3.16813	0	0
IL12mRNA.7d.05/NS.CTL.7d.5	Cyp2f2	6.49645	4.14547	2.35098	0	0
IL12mRNA.7d.05/NS.CTL.7d.5	Cyp39a1	4.96782	6.01114	-1.04332	0	0
IL12mRNA.7d.05/NS.CTL.7d.5	Cyp4b1	6.10896	4.7579	1.35106	0	0
IL12mRNA.7d.05/NS.CTL.7d.5	Cyp4f18	8.49071	7.0832	1.40751	0	0
IL12mRNA.7d.05/NS.CTL.7d.5	Cyp4v3	8.24368	6.58499	1.65869	0	0
IL12mRNA.7d.05/NS.CTL.7d.5	Cyp51	9.04852	10.3794	-1.33093	0.001	0.003
IL12mRNA.7d.05/NS.CTL.7d.5	Cyp7b1	6.22943	4.06848	2.16095	0	0
IL12mRNA.7d.05/NS.CTL.7d.5	Cyth4	7.5893	6.26849	1.32081	0	0
IL12mRNA.7d.05/NS.CTL.7d.5	Cytip	10.2234	7.82709	2.39633	0	0
IL12mRNA.7d.05/NS.CTL.7d.5	Cyyr1	6.166	4.80243	1.36356	0	0
IL12mRNA.7d.05/NS.CTL.7d.5	Dact1	7.24587	6.10119	1.14468	0	0
IL12mRNA.7d.05/NS.CTL.7d.5	Dapk1	7.54779	5.77279	1.775	0	0
IL12mRNA.7d.05/NS.CTL.7d.5	Dbt	5.99995	4.81144	1.18852	0	0
IL12mRNA.7d.05/NS.CTL.7d.5	Dcaf17	5.90244	6.95008	-1.04764	0.013	0.026
IL12mRNA.7d.05/NS.CTL.7d.5	Dcakd	7.74855	8.75111	-1.00257	0.004	0.01
IL12mRNA.7d.05/NS.CTL.7d.5	Dclk1	6.33331	7.34748	-1.01418	0	0
IL12mRNA.7d.05/NS.CTL.7d.5	Ddias	6.07735	7.08615	-1.0088	0.002	0.006
IL12mRNA.7d.05/NS.CTL.7d.5	Ddit4	9.31139	11.8417	-2.53028	0	0
IL12mRNA.7d.05/NS.CTL.7d.5	Ddx60	7.27848	8.46752	-1.18903	0.004	0.01
IL12mRNA.7d.05/NS.CTL.7d.5	Dennd1c	6.91211	5.4428	1.46931	0.003	0.008
IL12mRNA.7d.05/NS.CTL.7d.5	Dennd5b	5.27962	6.38912	-1.1095	0	0
IL12mRNA.7d.05/NS.CTL.7d.5	Depdc1a	6.55518	7.89288	-1.3377	0.002	0.006
IL12mRNA.7d.05/NS.CTL.7d.5	Dffb	6.81926	7.90194	-1.08268	0.001	0.003
IL12mRNA.7d.05/NS.CTL.7d.5	Dgat2	8.64758	7.28691	1.36067	0	0
IL12mRNA.7d.05/NS.CTL.7d.5	Dglucy	6.76093	5.56764	1.19329	0	0
IL12mRNA.7d.05/NS.CTL.7d.5	Dhcr24	6.65913	8.72992	-2.07079	0	0
IL12mRNA.7d.05/NS.CTL.7d.5	Dhrs3	8.31946	7.19773	1.12173	0	0
IL12mRNA.7d.05/NS.CTL.7d.5	Dleu2	5.78938	4.66153	1.12784	0	0
IL12mRNA.7d.05/NS.CTL.7d.5	Dmkn	5.3495	4.34314	1.00636	0	0
IL12mRNA.7d.05/NS.CTL.7d.5	Dmxl2	6.35356	5.25036	1.10319	0.016	0.031
IL12mRNA.7d.05/NS.CTL.7d.5	Dnaaf2	7.1085	8.12046	-1.01196	0.007	0.016
IL12mRNA.7d.05/NS.CTL.7d.5	Dnase1l3	8.56624	5.93399	2.63225	0	0
IL12mRNA.7d.05/NS.CTL.7d.5	Dock10	8.7703	7.02508	1.74522	0	0
IL12mRNA.7d.05/NS.CTL.7d.5	Dock2	4.85649	3.76999	1.08651	0	0
IL12mRNA.7d.05/NS.CTL.7d.5	Dok2	7.75113	6.26068	1.49044	0	0
IL12mRNA.7d.05/NS.CTL.7d.5	Dpp4	6.11649	4.18716	1.92933	0	0
IL12mRNA.7d.05/NS.CTL.7d.5	Dppa2	7.88618	8.90183	-1.01564	0.003	0.008
IL12mRNA.7d.05/NS.CTL.7d.5	Dppa4	7.71574	8.80247	-1.08673	0	0
IL12mRNA.7d.05/NS.CTL.7d.5	Dpt	9.83218	8.45378	1.3784	0	0
IL12mRNA.7d.05/NS.CTL.7d.5	Dram1	10.0721	8.97731	1.09474	0	0
IL12mRNA.7d.05/NS.CTL.7d.5	Dscc1	7.22606	8.61813	-1.39207	0	0
IL12mRNA.7d.05/NS.CTL.7d.5	Dusp1	9.15126	8.08207	1.06919	0	0
IL12mRNA.7d.05/NS.CTL.7d.5	Dusp18	5.56248	7.0465	-1.48402	0	0
IL12mRNA.7d.05/NS.CTL.7d.5	Dusp19	7.1121	8.2252	-1.1131	0	0
IL12mRNA.7d.05/NS.CTL.7d.5	Dusp4	7.66493	6.63523	1.0297	0.005	0.012
IL12mRNA.7d.05/NS.CTL.7d.5	Dynll1	4.88778	5.92461	-1.03683	0	0
IL12mRNA.7d.05/NS.CTL.7d.5	Dzip3	4.92792	6.5263	-1.59838	0	0
IL12mRNA.7d.05/NS.CTL.7d.5	E230029C05Rik	6.85043	5.75251	1.09792	0	0
IL12mRNA.7d.05/NS.CTL.7d.5	E2f7	7.50425	8.73377	-1.22952	0.001	0.003
IL12mRNA.7d.05/NS.CTL.7d.5	Ebf1	5.53301	3.74258	1.79043	0	0
IL12mRNA.7d.05/NS.CTL.7d.5	Ebi3	8.54936	6.86981	1.67954	0	0
IL12mRNA.7d.05/NS.CTL.7d.5	Ece1	8.13048	7.01918	1.1113	0	0
IL12mRNA.7d.05/NS.CTL.7d.5	Echdc1	7.41225	8.44103	-1.02879	0	0
IL12mRNA.7d.05/NS.CTL.7d.5	Eda2r	5.83012	6.92261	-1.09249	0.003	0.008
IL12mRNA.7d.05/NS.CTL.7d.5	Efcab11	5.06799	6.29288	-1.22489	0	0
IL12mRNA.7d.05/NS.CTL.7d.5	Efemp1	8.2891	4.63682	3.65228	0	0
IL12mRNA.7d.05/NS.CTL.7d.5	Efhd1	4.36653	3.31557	1.05095	0.001	0.003
IL12mRNA.7d.05/NS.CTL.7d.5	Egfr	7.19353	5.36836	1.82517	0	0
IL12mRNA.7d.05/NS.CTL.7d.5	Ehd3	7.30955	5.99046	1.3191	0	0
IL12mRNA.7d.05/NS.CTL.7d.5	Eif1ax	7.09971	8.13323	-1.03352	0.001	0.003
IL12mRNA.7d.05/NS.CTL.7d.5	Eif2ak2	6.22027	7.47793	-1.25766	0	0
IL12mRNA.7d.05/NS.CTL.7d.5	Eif4e3	7.83611	6.25775	1.57836	0	0
IL12mRNA.7d.05/NS.CTL.7d.5	Elmo1	7.68464	6.6743	1.01034	0	0
IL12mRNA.7d.05/NS.CTL.7d.5	Eloc	5.31976	6.38151	-1.06176	0	0
IL12mRNA.7d.05/NS.CTL.7d.5	Elovl6	7.22495	8.6121	-1.38714	0.001	0.003
IL12mRNA.7d.05/NS.CTL.7d.5	Emilin1	8.54074	9.57868	-1.03795	0	0
IL12mRNA.7d.05/NS.CTL.7d.5	Enpep	5.75004	4.54856	1.20148	0.001	0.003
IL12mRNA.7d.05/NS.CTL.7d.5	Enpp4	7.37563	5.56574	1.8099	0	0
IL12mRNA.7d.05/NS.CTL.7d.5	Entpd1	6.50795	4.78941	1.71855	0	0
IL12mRNA.7d.05/NS.CTL.7d.5	Epas1	9.52252	7.87134	1.65118	0	0
IL12mRNA.7d.05/NS.CTL.7d.5	Epb41l3	6.62221	5.42641	1.19579	0	0
IL12mRNA.7d.05/NS.CTL.7d.5	Epb41l5	5.79276	6.92732	-1.13456	0	0
IL12mRNA.7d.05/NS.CTL.7d.5	Ephx1	6.23342	4.42898	1.80444	0	0
IL12mRNA.7d.05/NS.CTL.7d.5	Ephx2	7.32601	5.27561	2.0504	0	0
IL12mRNA.7d.05/NS.CTL.7d.5	Eps15	7.35192	8.67862	-1.3267	0.003	0.008
IL12mRNA.7d.05/NS.CTL.7d.5	Etaa1	6.8704	7.89613	-1.02572	0.003	0.008
IL12mRNA.7d.05/NS.CTL.7d.5	Evl	9.27766	7.65726	1.6204	0	0
IL12mRNA.7d.05/NS.CTL.7d.5	Extl1	7.51221	8.70085	-1.18864	0	0
IL12mRNA.7d.05/NS.CTL.7d.5	Eya1	6.17668	7.4377	-1.26101	0	0
IL12mRNA.7d.05/NS.CTL.7d.5	F10	6.46323	4.90782	1.55541	0	0
IL12mRNA.7d.05/NS.CTL.7d.5	F13a1	10.5962	7.04075	3.55546	0	0
IL12mRNA.7d.05/NS.CTL.7d.5	F7	5.95794	4.59567	1.36226	0.003	0.008
IL12mRNA.7d.05/NS.CTL.7d.5	Fabp4	12.1519	9.52713	2.62478	0	0
IL12mRNA.7d.05/NS.CTL.7d.5	Fabp5	11.9607	10.226	1.73469	0	0
IL12mRNA.7d.05/NS.CTL.7d.5	Fabp7	6.34924	4.82079	1.52845	0	0
IL12mRNA.7d.05/NS.CTL.7d.5	Fads2	7.30773	8.76081	-1.45307	0	0
IL12mRNA.7d.05/NS.CTL.7d.5	Fam102a	7.35131	5.95693	1.39438	0	0
IL12mRNA.7d.05/NS.CTL.7d.5	Fam117a	6.73009	5.52397	1.20613	0.001	0.003
IL12mRNA.7d.05/NS.CTL.7d.5	Fam162a	6.36656	7.50496	-1.1384	0	0
IL12mRNA.7d.05/NS.CTL.7d.5	Fam171a1	6.25286	7.72897	-1.47611	0	0
IL12mRNA.7d.05/NS.CTL.7d.5	Fam189b	7.08737	5.87899	1.20838	0	0
IL12mRNA.7d.05/NS.CTL.7d.5	Fam20a	5.51315	4.22634	1.2868	0	0
IL12mRNA.7d.05/NS.CTL.7d.5	Fam20c	4.49902	3.44482	1.05419	0	0
IL12mRNA.7d.05/NS.CTL.7d.5	Fam213a	6.51011	5.09511	1.415	0	0
IL12mRNA.7d.05/NS.CTL.7d.5	Fam213b	8.4183	6.07794	2.34036	0	0
IL12mRNA.7d.05/NS.CTL.7d.5	Fam241a	7.35536	6.27486	1.0805	0	0
IL12mRNA.7d.05/NS.CTL.7d.5	Fam26f	10.6651	6.57177	4.09335	0	0
IL12mRNA.7d.05/NS.CTL.7d.5	Fam46c	8.10451	6.33132	1.77319	0	0
IL12mRNA.7d.05/NS.CTL.7d.5	Fam49a	7.33141	5.13566	2.19575	0	0
IL12mRNA.7d.05/NS.CTL.7d.5	Fam57a	7.75553	8.99708	-1.24155	0	0
IL12mRNA.7d.05/NS.CTL.7d.5	Fam78a	6.63542	5.29256	1.34287	0	0
IL12mRNA.7d.05/NS.CTL.7d.5	Fasl	6.16261	4.00539	2.15722	0	0
IL12mRNA.7d.05/NS.CTL.7d.5	Fbln2	10.3613	9.23691	1.1244	0	0
IL12mRNA.7d.05/NS.CTL.7d.5	Fbxo2	5.81852	7.41935	-1.60083	0	0
IL12mRNA.7d.05/NS.CTL.7d.5	Fcer1a	4.2397	3.09668	1.14301	0.001	0.003
IL12mRNA.7d.05/NS.CTL.7d.5	Fcer1g	12.1688	10.6575	1.51124	0	0
IL12mRNA.7d.05/NS.CTL.7d.5	Fcgr1	9.5541	8.36821	1.18588	0	0
IL12mRNA.7d.05/NS.CTL.7d.5	Fcgr2b	10.1148	8.38569	1.72907	0	0
IL12mRNA.7d.05/NS.CTL.7d.5	Fcgr3	11.0536	8.77616	2.27748	0	0
IL12mRNA.7d.05/NS.CTL.7d.5	Fcgr4	11.4453	8.72277	2.72257	0	0
IL12mRNA.7d.05/NS.CTL.7d.5	Fcgrt	9.53719	8.48331	1.05387	0	0
IL12mRNA.7d.05/NS.CTL.7d.5	Fcna	8.37685	6.26284	2.11401	0	0
IL12mRNA.7d.05/NS.CTL.7d.5	Fcrls	5.57087	7.30022	-1.72935	0	0
IL12mRNA.7d.05/NS.CTL.7d.5	Fdft1	7.6592	8.82067	-1.16147	0.015	0.029
IL12mRNA.7d.05/NS.CTL.7d.5	Fdps	10.027	11.3199	-1.29289	0	0
IL12mRNA.7d.05/NS.CTL.7d.5	Fermt3	9.23278	6.93042	2.30236	0	0
IL12mRNA.7d.05/NS.CTL.7d.5	Fes	8.62694	7.16909	1.45784	0	0
IL12mRNA.7d.05/NS.CTL.7d.5	Ffar2	7.53087	5.60412	1.92675	0	0
IL12mRNA.7d.05/NS.CTL.7d.5	Fgd2	8.13854	6.55823	1.58031	0	0
IL12mRNA.7d.05/NS.CTL.7d.5	Fgd3	6.6023	5.44968	1.15262	0	0
IL12mRNA.7d.05/NS.CTL.7d.5	Fgl2	9.68469	7.19695	2.48774	0	0
IL12mRNA.7d.05/NS.CTL.7d.5	Fgr	8.13478	6.74526	1.38952	0	0
IL12mRNA.7d.05/NS.CTL.7d.5	Fli1	6.99032	5.70446	1.28585	0.013	0.026
IL12mRNA.7d.05/NS.CTL.7d.5	Flot2	8.45968	6.66218	1.7975	0	0
IL12mRNA.7d.05/NS.CTL.7d.5	Fmo1	6.57484	5.03869	1.53615	0	0
IL12mRNA.7d.05/NS.CTL.7d.5	Fmr1nb	9.08456	10.1181	-1.03354	0	0
IL12mRNA.7d.05/NS.CTL.7d.5	Fndc1	8.23904	6.52306	1.71597	0	0
IL12mRNA.7d.05/NS.CTL.7d.5	Folr2	9.53309	7.19981	2.33327	0	0
IL12mRNA.7d.05/NS.CTL.7d.5	Fos	9.64006	8.61422	1.02584	0	0
IL12mRNA.7d.05/NS.CTL.7d.5	Foxd1	4.58218	5.75231	-1.17013	0.003	0.008
IL12mRNA.7d.05/NS.CTL.7d.5	Foxg1	6.70364	8.37382	-1.67018	0	0
IL12mRNA.7d.05/NS.CTL.7d.5	Foxs1	6.00429	7.86521	-1.86092	0	0
IL12mRNA.7d.05/NS.CTL.7d.5	Fpr1	8.52815	5.77621	2.75195	0	0
IL12mRNA.7d.05/NS.CTL.7d.5	Fpr2	11.0061	7.81298	3.19313	0	0
IL12mRNA.7d.05/NS.CTL.7d.5	Frk	5.57917	7.23369	-1.65452	0	0
IL12mRNA.7d.05/NS.CTL.7d.5	Frmd4b	9.67347	7.67694	1.99653	0	0
IL12mRNA.7d.05/NS.CTL.7d.5	Fry	6.60606	7.76366	-1.1576	0	0
IL12mRNA.7d.05/NS.CTL.7d.5	Fuca2	7.51091	5.90022	1.61069	0	0
IL12mRNA.7d.05/NS.CTL.7d.5	Fuom	6.56756	5.45216	1.1154	0	0
IL12mRNA.7d.05/NS.CTL.7d.5	Fxyd2	5.76471	4.08644	1.67827	0	0
IL12mRNA.7d.05/NS.CTL.7d.5	Fxyd6	5.45575	4.32842	1.12733	0.004	0.01
IL12mRNA.7d.05/NS.CTL.7d.5	G0s2	7.88277	6.62094	1.26183	0.001	0.003
IL12mRNA.7d.05/NS.CTL.7d.5	Gad1	3.14867	4.67881	-1.53014	0.006	0.014
IL12mRNA.7d.05/NS.CTL.7d.5	Galnt12	5.35895	4.19323	1.16573	0	0
IL12mRNA.7d.05/NS.CTL.7d.5	Galnt3	6.12462	4.92761	1.19701	0	0
IL12mRNA.7d.05/NS.CTL.7d.5	Galnt6	7.37359	6.18627	1.18732	0	0
IL12mRNA.7d.05/NS.CTL.7d.5	Gas5	8.95376	10.0869	-1.13318	0	0
IL12mRNA.7d.05/NS.CTL.7d.5	Gas6	8.79314	6.42392	2.36922	0	0
IL12mRNA.7d.05/NS.CTL.7d.5	Gas7	7.35198	5.84546	1.50652	0	0
IL12mRNA.7d.05/NS.CTL.7d.5	Gbp2	12.3627	11.1479	1.21482	0	0
IL12mRNA.7d.05/NS.CTL.7d.5	Gbp2b	10.1019	4.21243	5.88949	0	0
IL12mRNA.7d.05/NS.CTL.7d.5	Gbp6	11.3312	9.03831	2.29287	0	0
IL12mRNA.7d.05/NS.CTL.7d.5	Gbp8	9.16554	6.3032	2.86235	0	0
IL12mRNA.7d.05/NS.CTL.7d.5	Gda	9.96997	6.93829	3.03168	0	0
IL12mRNA.7d.05/NS.CTL.7d.5	Gfpt2	7.62797	6.30789	1.32008	0	0
IL12mRNA.7d.05/NS.CTL.7d.5	Ggt1	6.05366	4.85661	1.19706	0	0
IL12mRNA.7d.05/NS.CTL.7d.5	Ggt7	6.60987	7.63799	-1.02813	0	0
IL12mRNA.7d.05/NS.CTL.7d.5	Gigyf2	5.17238	6.24333	-1.07095	0	0
IL12mRNA.7d.05/NS.CTL.7d.5	Gimap1	7.03431	5.52445	1.50986	0	0
IL12mRNA.7d.05/NS.CTL.7d.5	Gimap3	8.42188	6.40655	2.01533	0	0
IL12mRNA.7d.05/NS.CTL.7d.5	Gimap4	10.2545	7.60057	2.6539	0	0
IL12mRNA.7d.05/NS.CTL.7d.5	Gimap6	7.71879	6.00589	1.71291	0	0
IL12mRNA.7d.05/NS.CTL.7d.5	Gimap7	7.88714	4.70885	3.17829	0	0
IL12mRNA.7d.05/NS.CTL.7d.5	Gimap8	8.00341	5.77906	2.22435	0	0
IL12mRNA.7d.05/NS.CTL.7d.5	Gli1	5.94526	7.67301	-1.72774	0	0
IL12mRNA.7d.05/NS.CTL.7d.5	Gli3	8.14845	9.27457	-1.12612	0.001	0.003
IL12mRNA.7d.05/NS.CTL.7d.5	Glipr2	7.31071	6.23857	1.07214	0.001	0.003
IL12mRNA.7d.05/NS.CTL.7d.5	Glrx	9.43006	7.61455	1.81552	0	0
IL12mRNA.7d.05/NS.CTL.7d.5	Gls	7.89958	8.95218	-1.0526	0	0
IL12mRNA.7d.05/NS.CTL.7d.5	Glul	7.79883	6.78591	1.01292	0	0
IL12mRNA.7d.05/NS.CTL.7d.5	Gm11772	4.5393	5.75321	-1.21391	0	0
IL12mRNA.7d.05/NS.CTL.7d.5	Gm2a	10.8919	8.70408	2.18787	0	0
IL12mRNA.7d.05/NS.CTL.7d.5	Gm364	7.34099	9.02108	-1.68009	0.003	0.008
IL12mRNA.7d.05/NS.CTL.7d.5	Gm38448	4.14177	3.05602	1.08575	0	0
IL12mRNA.7d.05/NS.CTL.7d.5	Gm4371	5.96877	7.14042	-1.17164	0	0
IL12mRNA.7d.05/NS.CTL.7d.5	Gm8369	4.57875	3.41963	1.15912	0.001	0.003
IL12mRNA.7d.05/NS.CTL.7d.5	Gm9706	7.0582	8.07255	-1.01435	0	0
IL12mRNA.7d.05/NS.CTL.7d.5	Gmfb	6.09123	7.25487	-1.16365	0.001	0.003
IL12mRNA.7d.05/NS.CTL.7d.5	Gmfg	9.37606	6.42682	2.94925	0	0
IL12mRNA.7d.05/NS.CTL.7d.5	Gmps	5.75539	6.8132	-1.05781	0	0
IL12mRNA.7d.05/NS.CTL.7d.5	Gnai1	6.44154	4.63389	1.80765	0	0
IL12mRNA.7d.05/NS.CTL.7d.5	Gng2	8.95565	7.01212	1.94353	0	0
IL12mRNA.7d.05/NS.CTL.7d.5	Gngt2	7.39504	5.98829	1.40675	0	0
IL12mRNA.7d.05/NS.CTL.7d.5	Gns	11.6231	10.3063	1.31685	0	0
IL12mRNA.7d.05/NS.CTL.7d.5	Gpd1	6.8915	5.57236	1.31913	0	0
IL12mRNA.7d.05/NS.CTL.7d.5	Gpm6b	6.39294	3.94998	2.44296	0	0
IL12mRNA.7d.05/NS.CTL.7d.5	Gpnmb	9.99915	8.14352	1.85563	0	0
IL12mRNA.7d.05/NS.CTL.7d.5	Gpr137b-ps	9.41497	8.34438	1.07059	0	0
IL12mRNA.7d.05/NS.CTL.7d.5	Gpr149	4.27971	5.39976	-1.12005	0.001	0.003
IL12mRNA.7d.05/NS.CTL.7d.5	Gpr160	5.93801	4.61046	1.32756	0	0
IL12mRNA.7d.05/NS.CTL.7d.5	Gpr171	7.39622	5.81053	1.58569	0	0
IL12mRNA.7d.05/NS.CTL.7d.5	Gpr174	4.27762	2.69959	1.57803	0.002	0.006
IL12mRNA.7d.05/NS.CTL.7d.5	Gpr18	7.42614	6.05683	1.36931	0.002	0.006
IL12mRNA.7d.05/NS.CTL.7d.5	Gpr183	6.61844	5.51208	1.10636	0.001	0.003
IL12mRNA.7d.05/NS.CTL.7d.5	Gpr35	6.89403	5.73519	1.15884	0.006	0.014
IL12mRNA.7d.05/NS.CTL.7d.5	Gpr65	7.45161	5.95923	1.49237	0	0
IL12mRNA.7d.05/NS.CTL.7d.5	Gpr68	6.58082	5.46969	1.11113	0.001	0.003
IL12mRNA.7d.05/NS.CTL.7d.5	Gpr84	6.6887	5.33458	1.35412	0	0
IL12mRNA.7d.05/NS.CTL.7d.5	Gpsm3	9.37157	8.2919	1.07967	0	0
IL12mRNA.7d.05/NS.CTL.7d.5	Gpx3	10.4313	8.14364	2.28763	0.001	0.003
IL12mRNA.7d.05/NS.CTL.7d.5	Gpx7	7.07055	5.42822	1.64232	0	0
IL12mRNA.7d.05/NS.CTL.7d.5	Gpx8	8.95729	9.98461	-1.02731	0.001	0.003
IL12mRNA.7d.05/NS.CTL.7d.5	Grb10	7.37378	6.24811	1.12567	0.005	0.012
IL12mRNA.7d.05/NS.CTL.7d.5	Grem2	5.68375	4.6214	1.06235	0	0
IL12mRNA.7d.05/NS.CTL.7d.5	Grina	10.8677	9.70612	1.16157	0	0
IL12mRNA.7d.05/NS.CTL.7d.5	Grk3	8.11432	6.98997	1.12434	0	0
IL12mRNA.7d.05/NS.CTL.7d.5	Gsn	10.5875	9.4379	1.14958	0	0
IL12mRNA.7d.05/NS.CTL.7d.5	Gsta2	6.47838	5.38166	1.09672	0.027	0.047
IL12mRNA.7d.05/NS.CTL.7d.5	Gstk1	6.64063	5.47471	1.16592	0.002	0.006
IL12mRNA.7d.05/NS.CTL.7d.5	Gstm1	8.77053	7.48652	1.28401	0	0
IL12mRNA.7d.05/NS.CTL.7d.5	Gstp3	6.64637	5.25018	1.39619	0	0
IL12mRNA.7d.05/NS.CTL.7d.5	Gstt2	6.22298	4.58713	1.63586	0	0
IL12mRNA.7d.05/NS.CTL.7d.5	Gt(ROSA)26Sor	7.29902	8.59988	-1.30086	0.001	0.003
IL12mRNA.7d.05/NS.CTL.7d.5	Gulp1	6.81327	8.71467	-1.9014	0	0
IL12mRNA.7d.05/NS.CTL.7d.5	Gzmc	8.4977	9.59666	-1.09896	0.01	0.021
IL12mRNA.7d.05/NS.CTL.7d.5	Gzmk	7.7311	5.16548	2.56562	0	0
IL12mRNA.7d.05/NS.CTL.7d.5	H2-Aa	10.0428	5.44256	4.60021	0	0
IL12mRNA.7d.05/NS.CTL.7d.5	H2-Ab1	12.0122	7.90321	4.10899	0	0
IL12mRNA.7d.05/NS.CTL.7d.5	H2-DMa	10.2634	7.51764	2.74572	0	0
IL12mRNA.7d.05/NS.CTL.7d.5	H2-DMb2	6.74511	5.35298	1.39212	0	0
IL12mRNA.7d.05/NS.CTL.7d.5	H2-Eb1	12.6963	9.06875	3.62752	0	0
IL12mRNA.7d.05/NS.CTL.7d.5	H2-Q5	8.3827	6.55981	1.82288	0	0
IL12mRNA.7d.05/NS.CTL.7d.5	Hacd4	8.46511	6.97682	1.48829	0	0
IL12mRNA.7d.05/NS.CTL.7d.5	Has2	6.34523	7.38102	-1.03579	0.002	0.006
IL12mRNA.7d.05/NS.CTL.7d.5	Haus7	8.8474	10.0437	-1.19632	0	0
IL12mRNA.7d.05/NS.CTL.7d.5	Havcr2	6.95495	5.90825	1.0467	0.001	0.003
IL12mRNA.7d.05/NS.CTL.7d.5	Hcar2	6.58278	4.51843	2.06435	0	0
IL12mRNA.7d.05/NS.CTL.7d.5	Hcfc1r1	10.3478	9.23295	1.11486	0	0
IL12mRNA.7d.05/NS.CTL.7d.5	Hck	9.78559	8.22126	1.56432	0	0
IL12mRNA.7d.05/NS.CTL.7d.5	Hcls1	8.92751	6.88068	2.04682	0	0
IL12mRNA.7d.05/NS.CTL.7d.5	Hcn1	5.58	6.66233	-1.08233	0.002	0.006
IL12mRNA.7d.05/NS.CTL.7d.5	Hcst	8.16848	6.20466	1.96382	0	0
IL12mRNA.7d.05/NS.CTL.7d.5	Hdgfl3	6.69241	7.75972	-1.0673	0	0
IL12mRNA.7d.05/NS.CTL.7d.5	Helz2	8.70517	9.86577	-1.1606	0	0
IL12mRNA.7d.05/NS.CTL.7d.5	Hgf	5.49324	6.73891	-1.24567	0.003	0.008
IL12mRNA.7d.05/NS.CTL.7d.5	Higd1a	6.66482	7.69912	-1.0343	0	0
IL12mRNA.7d.05/NS.CTL.7d.5	Hk3	9.62192	6.92094	2.70098	0	0
IL12mRNA.7d.05/NS.CTL.7d.5	Hmgcs1	7.99232	9.25876	-1.26644	0	0
IL12mRNA.7d.05/NS.CTL.7d.5	Hmgn3	9.53823	10.5426	-1.00434	0	0
IL12mRNA.7d.05/NS.CTL.7d.5	Hmox1	10.6715	9.04477	1.62674	0	0
IL12mRNA.7d.05/NS.CTL.7d.5	Hnrnpa1	5.90568	6.94322	-1.03754	0	0
IL12mRNA.7d.05/NS.CTL.7d.5	Hnrnpdl	5.61086	7.00934	-1.39848	0	0
IL12mRNA.7d.05/NS.CTL.7d.5	Hp	12.159	7.8827	4.27626	0.001	0.003
IL12mRNA.7d.05/NS.CTL.7d.5	Hpgd	5.06213	3.82666	1.23547	0	0
IL12mRNA.7d.05/NS.CTL.7d.5	Hpse	9.52653	8.41155	1.11498	0	0
IL12mRNA.7d.05/NS.CTL.7d.5	Hpx	6.63674	5.08765	1.54909	0	0
IL12mRNA.7d.05/NS.CTL.7d.5	Hs6st2	4.95045	3.77366	1.17679	0	0
IL12mRNA.7d.05/NS.CTL.7d.5	Hsd17b11	10.1997	8.88245	1.3172	0	0
IL12mRNA.7d.05/NS.CTL.7d.5	Hsd3b7	9.07244	7.69858	1.37387	0	0
IL12mRNA.7d.05/NS.CTL.7d.5	Hspa4	6.94995	8.02525	-1.07531	0	0
IL12mRNA.7d.05/NS.CTL.7d.5	Htatip2	8.14116	6.19596	1.9452	0	0
IL12mRNA.7d.05/NS.CTL.7d.5	Htra3	8.66637	6.54511	2.12126	0	0
IL12mRNA.7d.05/NS.CTL.7d.5	Hvcn1	8.19246	6.84735	1.34511	0	0
IL12mRNA.7d.05/NS.CTL.7d.5	Icam1	9.28123	7.74943	1.5318	0	0
IL12mRNA.7d.05/NS.CTL.7d.5	Icos	7.49877	5.66905	1.82973	0	0
IL12mRNA.7d.05/NS.CTL.7d.5	Id2	9.95232	7.81968	2.13264	0	0
IL12mRNA.7d.05/NS.CTL.7d.5	Idi1	6.68407	8.58673	-1.90266	0.001	0.003
IL12mRNA.7d.05/NS.CTL.7d.5	Ido1	8.31854	5.97623	2.3423	0	0
IL12mRNA.7d.05/NS.CTL.7d.5	Ifi44	9.69416	10.7427	-1.04852	0	0
IL12mRNA.7d.05/NS.CTL.7d.5	Ifitm1	10.4484	9.44331	1.00512	0.005	0.012
IL12mRNA.7d.05/NS.CTL.7d.5	Ifng	8.98829	5.24298	3.74532	0	0
IL12mRNA.7d.05/NS.CTL.7d.5	Ifnz	7.68179	8.75202	-1.07024	0	0
IL12mRNA.7d.05/NS.CTL.7d.5	Ift27	6.71581	7.75941	-1.04359	0	0
IL12mRNA.7d.05/NS.CTL.7d.5	Igf1	7.94385	5.66463	2.27921	0	0
IL12mRNA.7d.05/NS.CTL.7d.5	Igfbp5	8.54445	6.80173	1.74273	0	0
IL12mRNA.7d.05/NS.CTL.7d.5	Ighm	9.6885	8.25351	1.43499	0.004	0.01
IL12mRNA.7d.05/NS.CTL.7d.5	Igsf3	7.5425	8.61898	-1.07648	0	0
IL12mRNA.7d.05/NS.CTL.7d.5	Igsf6	7.97525	5.31671	2.65854	0	0
IL12mRNA.7d.05/NS.CTL.7d.5	Iigp1	12.2403	11.1655	1.07481	0	0
IL12mRNA.7d.05/NS.CTL.7d.5	Ikbke	8.2036	6.79418	1.40942	0	0
IL12mRNA.7d.05/NS.CTL.7d.5	Ikzf1	8.11649	6.17192	1.94457	0	0
IL12mRNA.7d.05/NS.CTL.7d.5	Ikzf3	6.80461	4.23982	2.56479	0	0
IL12mRNA.7d.05/NS.CTL.7d.5	Il10	5.01667	4.01093	1.00575	0.001	0.003
IL12mRNA.7d.05/NS.CTL.7d.5	Il10ra	6.90854	5.3118	1.59674	0	0
IL12mRNA.7d.05/NS.CTL.7d.5	Il12rb1	8.63026	7.49725	1.13301	0.001	0.003
IL12mRNA.7d.05/NS.CTL.7d.5	Il16	7.19813	5.50674	1.69138	0	0
IL12mRNA.7d.05/NS.CTL.7d.5	Il18	8.42685	7.37292	1.05393	0.001	0.003
IL12mRNA.7d.05/NS.CTL.7d.5	Il18bp	9.84335	7.84438	1.99897	0	0
IL12mRNA.7d.05/NS.CTL.7d.5	Il18r1	9.05126	4.89956	4.1517	0	0
IL12mRNA.7d.05/NS.CTL.7d.5	Il1a	4.11108	2.95116	1.15992	0	0
IL12mRNA.7d.05/NS.CTL.7d.5	Il1b	8.78944	7.26416	1.52528	0	0
IL12mRNA.7d.05/NS.CTL.7d.5	Il1rl1	11.164	9.49731	1.66671	0	0
IL12mRNA.7d.05/NS.CTL.7d.5	Il1rn	9.23844	6.98857	2.24987	0	0
IL12mRNA.7d.05/NS.CTL.7d.5	Il21r	7.37599	6.29719	1.0788	0	0
IL12mRNA.7d.05/NS.CTL.7d.5	Il2rb	8.01135	6.31847	1.69288	0	0
IL12mRNA.7d.05/NS.CTL.7d.5	Il3ra	7.00401	5.73321	1.2708	0	0
IL12mRNA.7d.05/NS.CTL.7d.5	Il4ra	8.21278	6.74361	1.46917	0	0
IL12mRNA.7d.05/NS.CTL.7d.5	Il7r	9.92156	6.57251	3.34905	0	0
IL12mRNA.7d.05/NS.CTL.7d.5	Immt	6.86278	7.98681	-1.12403	0.024	0.043
IL12mRNA.7d.05/NS.CTL.7d.5	Inpp5d	9.14714	7.6151	1.53204	0	0
IL12mRNA.7d.05/NS.CTL.7d.5	Ipcef1	6.88029	5.03254	1.84776	0.001	0.003
IL12mRNA.7d.05/NS.CTL.7d.5	Iqgap2	7.53363	5.05014	2.48349	0	0
IL12mRNA.7d.05/NS.CTL.7d.5	Irak2	7.7717	6.56524	1.20646	0	0
IL12mRNA.7d.05/NS.CTL.7d.5	Irak3	7.26421	4.88733	2.37689	0	0
IL12mRNA.7d.05/NS.CTL.7d.5	Irf5	8.90046	7.49465	1.40581	0	0
IL12mRNA.7d.05/NS.CTL.7d.5	Irf8	9.98672	7.87728	2.10944	0	0
IL12mRNA.7d.05/NS.CTL.7d.5	Irs2	6.84066	5.82675	1.01391	0	0
IL12mRNA.7d.05/NS.CTL.7d.5	Irx3	6.76053	4.61777	2.14276	0	0
IL12mRNA.7d.05/NS.CTL.7d.5	Isg20	8.57527	9.74471	-1.16943	0	0
IL12mRNA.7d.05/NS.CTL.7d.5	Isl1	4.52167	6.37504	-1.85337	0	0
IL12mRNA.7d.05/NS.CTL.7d.5	Isyna1	6.60323	5.59945	1.00378	0	0
IL12mRNA.7d.05/NS.CTL.7d.5	Itfg1	6.54202	8.02463	-1.48261	0.007	0.016
IL12mRNA.7d.05/NS.CTL.7d.5	Itga4	8.71109	6.26471	2.44638	0	0
IL12mRNA.7d.05/NS.CTL.7d.5	Itgal	10.2437	7.18546	3.05823	0	0
IL12mRNA.7d.05/NS.CTL.7d.5	Itgam	7.67301	6.22908	1.44393	0	0
IL12mRNA.7d.05/NS.CTL.7d.5	Itgb2	11.3965	9.2231	2.17342	0	0
IL12mRNA.7d.05/NS.CTL.7d.5	Itgb3bp	6.50535	7.97616	-1.47081	0	0
IL12mRNA.7d.05/NS.CTL.7d.5	Itgb7	8.62723	6.14604	2.48119	0	0
IL12mRNA.7d.05/NS.CTL.7d.5	Itih5	7.19414	5.19973	1.99441	0	0
IL12mRNA.7d.05/NS.CTL.7d.5	Itk	6.5568	4.17083	2.38597	0	0
IL12mRNA.7d.05/NS.CTL.7d.5	Kbtbd11	8.6872	6.01359	2.67361	0	0
IL12mRNA.7d.05/NS.CTL.7d.5	Kcne3	3.48038	5.02342	-1.54305	0.001	0.003
IL12mRNA.7d.05/NS.CTL.7d.5	Kcnj15	4.7457	3.57848	1.16722	0	0
IL12mRNA.7d.05/NS.CTL.7d.5	Kdelr3	8.93505	9.99087	-1.05582	0	0
IL12mRNA.7d.05/NS.CTL.7d.5	Kdm1b	7.65141	8.72877	-1.07736	0.002	0.006
IL12mRNA.7d.05/NS.CTL.7d.5	Kif11	7.19944	8.44431	-1.24487	0.004	0.01
IL12mRNA.7d.05/NS.CTL.7d.5	Klc1	6.6771	7.88603	-1.20893	0.005	0.012
IL12mRNA.7d.05/NS.CTL.7d.5	Klf7	6.81929	8.06993	-1.25064	0.02	0.037
IL12mRNA.7d.05/NS.CTL.7d.5	Klhl6	8.17842	6.29173	1.88669	0	0
IL12mRNA.7d.05/NS.CTL.7d.5	Klra2	7.33802	5.69921	1.63881	0	0
IL12mRNA.7d.05/NS.CTL.7d.5	Klrb1b	5.6145	4.42276	1.19175	0	0
IL12mRNA.7d.05/NS.CTL.7d.5	Klrb1f	5.71805	4.22351	1.49454	0	0
IL12mRNA.7d.05/NS.CTL.7d.5	Klrc1	7.47681	4.71107	2.76575	0	0
IL12mRNA.7d.05/NS.CTL.7d.5	Klrd1	8.22614	6.75344	1.4727	0	0
IL12mRNA.7d.05/NS.CTL.7d.5	Klre1	6.18183	4.8184	1.36342	0	0
IL12mRNA.7d.05/NS.CTL.7d.5	Klrg1	8.0918	5.72869	2.36311	0	0
IL12mRNA.7d.05/NS.CTL.7d.5	Klrk1	8.2796	6.47041	1.8092	0	0
IL12mRNA.7d.05/NS.CTL.7d.5	Kmt2e	6.34789	7.38099	-1.0331	0.014	0.028
IL12mRNA.7d.05/NS.CTL.7d.5	Knl1	6.99208	8.20495	-1.21287	0	0
IL12mRNA.7d.05/NS.CTL.7d.5	Kpnb1	6.84738	7.84801	-1.00063	0.003	0.008
IL12mRNA.7d.05/NS.CTL.7d.5	Krt18	6.82221	4.84083	1.98138	0	0
IL12mRNA.7d.05/NS.CTL.7d.5	Krt19	6.44685	4.95288	1.49396	0	0
IL12mRNA.7d.05/NS.CTL.7d.5	Krt8	6.40238	5.01594	1.38644	0	0
IL12mRNA.7d.05/NS.CTL.7d.5	L1cam	6.78169	5.45373	1.32796	0	0
IL12mRNA.7d.05/NS.CTL.7d.5	LOC432459	5.24646	4.16302	1.08344	0	0
IL12mRNA.7d.05/NS.CTL.7d.5	LOC552908	6.89306	8.00018	-1.10711	0.002	0.006
IL12mRNA.7d.05/NS.CTL.7d.5	LOC665506	6.74306	5.23568	1.50738	0.001	0.003
IL12mRNA.7d.05/NS.CTL.7d.5	Lactb2	7.86618	9.11194	-1.24577	0.001	0.003
IL12mRNA.7d.05/NS.CTL.7d.5	Lag3	6.71355	5.63662	1.07694	0	0
IL12mRNA.7d.05/NS.CTL.7d.5	Lair1	8.0712	6.73735	1.33385	0	0
IL12mRNA.7d.05/NS.CTL.7d.5	Lancl2	4.62679	5.73987	-1.11308	0	0
IL12mRNA.7d.05/NS.CTL.7d.5	Laptm5	11.6746	9.63283	2.04181	0	0
IL12mRNA.7d.05/NS.CTL.7d.5	Lat	8.00653	5.86171	2.14482	0	0
IL12mRNA.7d.05/NS.CTL.7d.5	Lat2	8.10652	6.76024	1.34627	0	0
IL12mRNA.7d.05/NS.CTL.7d.5	Lck	9.38581	6.50213	2.88369	0	0
IL12mRNA.7d.05/NS.CTL.7d.5	Lcn2	9.23638	5.3097	3.92669	0	0
IL12mRNA.7d.05/NS.CTL.7d.5	Lcp1	11.2724	9.44862	1.82375	0	0
IL12mRNA.7d.05/NS.CTL.7d.5	Lcp2	9.63831	7.37792	2.26039	0	0
IL12mRNA.7d.05/NS.CTL.7d.5	Lgi2	6.02453	4.58902	1.43551	0	0
IL12mRNA.7d.05/NS.CTL.7d.5	Lgmn	11.837	10.5788	1.25816	0	0
IL12mRNA.7d.05/NS.CTL.7d.5	Lifr	7.20193	5.1961	2.00583	0	0
IL12mRNA.7d.05/NS.CTL.7d.5	Lin54	7.46258	8.57018	-1.1076	0.023	0.042
IL12mRNA.7d.05/NS.CTL.7d.5	Lipe	7.95641	6.14132	1.81509	0	0
IL12mRNA.7d.05/NS.CTL.7d.5	Lipg	5.30239	6.65509	-1.3527	0.001	0.003
IL12mRNA.7d.05/NS.CTL.7d.5	Lipo3	6.25776	4.68369	1.57407	0	0
IL12mRNA.7d.05/NS.CTL.7d.5	Lmnb1	8.55301	10.0371	-1.48406	0	0
IL12mRNA.7d.05/NS.CTL.7d.5	Lmo2	8.98293	7.53329	1.44964	0	0
IL12mRNA.7d.05/NS.CTL.7d.5	Lox	9.88882	7.20484	2.68398	0.002	0.006
IL12mRNA.7d.05/NS.CTL.7d.5	Loxl1	9.22423	6.35204	2.87219	0	0
IL12mRNA.7d.05/NS.CTL.7d.5	Lpcat2	8.59144	6.956	1.63544	0	0
IL12mRNA.7d.05/NS.CTL.7d.5	Lpl	9.20531	6.83616	2.36914	0	0
IL12mRNA.7d.05/NS.CTL.7d.5	Lrch2	5.73569	6.77524	-1.03955	0	0
IL12mRNA.7d.05/NS.CTL.7d.5	Lrg1	9.85032	6.67742	3.1729	0.002	0.006
IL12mRNA.7d.05/NS.CTL.7d.5	Lrif1	6.39299	7.65386	-1.26088	0	0
IL12mRNA.7d.05/NS.CTL.7d.5	Lrig1	8.42908	10.035	-1.60593	0	0
IL12mRNA.7d.05/NS.CTL.7d.5	Lrmda	5.2254	3.096	2.1294	0	0
IL12mRNA.7d.05/NS.CTL.7d.5	Lrmp	7.0901	5.49087	1.59922	0	0
IL12mRNA.7d.05/NS.CTL.7d.5	Lrp1	10.5088	9.46951	1.03931	0	0
IL12mRNA.7d.05/NS.CTL.7d.5	Lrr1	5.24656	6.31463	-1.06807	0	0
IL12mRNA.7d.05/NS.CTL.7d.5	Lss	5.10501	6.51448	-1.40947	0	0
IL12mRNA.7d.05/NS.CTL.7d.5	Lst1	10.4881	8.80546	1.68263	0	0
IL12mRNA.7d.05/NS.CTL.7d.5	Ltb	9.89705	6.58387	3.31318	0	0
IL12mRNA.7d.05/NS.CTL.7d.5	Ltb4r1	6.44505	5.20293	1.24212	0	0
IL12mRNA.7d.05/NS.CTL.7d.5	Ltbp2	7.76671	6.25423	1.51248	0.001	0.003
IL12mRNA.7d.05/NS.CTL.7d.5	Ltc4s	6.95849	5.7658	1.19269	0	0
IL12mRNA.7d.05/NS.CTL.7d.5	Ltf	7.30686	5.14267	2.16418	0	0
IL12mRNA.7d.05/NS.CTL.7d.5	Lum	8.61156	7.30624	1.30532	0.009	0.019
IL12mRNA.7d.05/NS.CTL.7d.5	Lxn	8.30088	6.91404	1.38685	0	0
IL12mRNA.7d.05/NS.CTL.7d.5	Ly6a	13.3703	12.2773	1.09303	0	0
IL12mRNA.7d.05/NS.CTL.7d.5	Ly6i	8.75109	6.17109	2.58	0	0
IL12mRNA.7d.05/NS.CTL.7d.5	Ly86	11.4673	9.82726	1.64008	0	0
IL12mRNA.7d.05/NS.CTL.7d.5	Ly9	7.84814	6.32262	1.52552	0	0
IL12mRNA.7d.05/NS.CTL.7d.5	Lyl1	7.40303	5.81682	1.5862	0	0
IL12mRNA.7d.05/NS.CTL.7d.5	Lyst	8.12388	7.08568	1.0382	0	0
IL12mRNA.7d.05/NS.CTL.7d.5	Lyve1	8.67387	5.6786	2.99526	0.002	0.006
IL12mRNA.7d.05/NS.CTL.7d.5	Lyz1	13.8452	12.0404	1.80481	0	0
IL12mRNA.7d.05/NS.CTL.7d.5	Lyz2	13.2401	10.9956	2.24452	0	0
IL12mRNA.7d.05/NS.CTL.7d.5	Macrod2	4.52545	5.6397	-1.11425	0.002	0.006
IL12mRNA.7d.05/NS.CTL.7d.5	Maf	7.76227	6.35446	1.40782	0	0
IL12mRNA.7d.05/NS.CTL.7d.5	Mafb	9.37479	7.57602	1.79876	0	0
IL12mRNA.7d.05/NS.CTL.7d.5	Magea5	7.44304	9.08245	-1.63941	0	0
IL12mRNA.7d.05/NS.CTL.7d.5	Mageb3	6.71441	7.72621	-1.01179	0	0
IL12mRNA.7d.05/NS.CTL.7d.5	Magee1	5.86116	6.94751	-1.08635	0	0
IL12mRNA.7d.05/NS.CTL.7d.5	Magef1	6.76096	7.86471	-1.10375	0.007	0.016
IL12mRNA.7d.05/NS.CTL.7d.5	Mamstr	5.48857	6.56376	-1.07518	0	0
IL12mRNA.7d.05/NS.CTL.7d.5	Mansc1	5.27869	4.00968	1.269	0	0
IL12mRNA.7d.05/NS.CTL.7d.5	Maob	6.21861	4.93553	1.28308	0.001	0.003
IL12mRNA.7d.05/NS.CTL.7d.5	Map2k6	6.73576	7.87033	-1.13457	0	0
IL12mRNA.7d.05/NS.CTL.7d.5	Map3k8	6.41289	5.07566	1.33724	0	0
IL12mRNA.7d.05/NS.CTL.7d.5	Mapk8	5.14642	6.19529	-1.04888	0	0
IL12mRNA.7d.05/NS.CTL.7d.5	Mapkapk3	8.34546	7.21493	1.13053	0	0
IL12mRNA.7d.05/NS.CTL.7d.5	2018-03-01	7.1775	4.97046	2.20703	0	0
IL12mRNA.7d.05/NS.CTL.7d.5	2018-03-03	5.50437	4.48741	1.01696	0.003	0.008
IL12mRNA.7d.05/NS.CTL.7d.5	Marco	9.79482	4.50066	5.29416	0	0
IL12mRNA.7d.05/NS.CTL.7d.5	Mast4	4.88727	5.90556	-1.01829	0.001	0.003
IL12mRNA.7d.05/NS.CTL.7d.5	Matn2	7.5676	9.25898	-1.69138	0	0
IL12mRNA.7d.05/NS.CTL.7d.5	Mbd4	5.49937	6.69451	-1.19513	0.001	0.003
IL12mRNA.7d.05/NS.CTL.7d.5	Mboat2	7.74657	9.04634	-1.29977	0.001	0.003
IL12mRNA.7d.05/NS.CTL.7d.5	Mbp	6.28587	4.33421	1.95166	0.004	0.01
IL12mRNA.7d.05/NS.CTL.7d.5	Mc2r	4.94696	3.94031	1.00665	0.005	0.012
IL12mRNA.7d.05/NS.CTL.7d.5	Mcemp1	7.85221	6.22655	1.62566	0	0
IL12mRNA.7d.05/NS.CTL.7d.5	Mcoln2	6.55889	4.7386	1.8203	0	0
IL12mRNA.7d.05/NS.CTL.7d.5	Mcpt4	6.07181	4.85812	1.2137	0.002	0.006
IL12mRNA.7d.05/NS.CTL.7d.5	Medag	6.64355	7.99799	-1.35445	0	0
IL12mRNA.7d.05/NS.CTL.7d.5	Mefv	7.48743	6.20289	1.28454	0	0
IL12mRNA.7d.05/NS.CTL.7d.5	Meg3	8.58206	7.14844	1.43362	0	0
IL12mRNA.7d.05/NS.CTL.7d.5	Meis2	6.40305	7.68651	-1.28346	0.002	0.006
IL12mRNA.7d.05/NS.CTL.7d.5	Mertk	7.98517	6.26188	1.72328	0	0
IL12mRNA.7d.05/NS.CTL.7d.5	Metrn	8.22637	9.52322	-1.29686	0	0
IL12mRNA.7d.05/NS.CTL.7d.5	Mex3b	6.15554	7.33229	-1.17675	0.006	0.014
IL12mRNA.7d.05/NS.CTL.7d.5	Mfap5	9.10352	7.12063	1.98289	0.001	0.003
IL12mRNA.7d.05/NS.CTL.7d.5	Mfsd13a	6.19141	4.7578	1.43361	0	0
IL12mRNA.7d.05/NS.CTL.7d.5	Mfsd6	7.76091	6.44033	1.32058	0	0
IL12mRNA.7d.05/NS.CTL.7d.5	Mgll	7.15669	5.36546	1.79123	0	0
IL12mRNA.7d.05/NS.CTL.7d.5	Mgp	8.30628	9.68507	-1.37879	0.001	0.003
IL12mRNA.7d.05/NS.CTL.7d.5	Mgst1	11.6193	9.89056	1.72874	0	0
IL12mRNA.7d.05/NS.CTL.7d.5	Mlph	5.04038	6.51157	-1.47119	0	0
IL12mRNA.7d.05/NS.CTL.7d.5	Mmab	4.73133	5.92023	-1.1889	0	0
IL12mRNA.7d.05/NS.CTL.7d.5	Mmp12	10.1431	6.40137	3.7417	0	0
IL12mRNA.7d.05/NS.CTL.7d.5	Mmp13	9.38843	7.36655	2.02188	0	0
IL12mRNA.7d.05/NS.CTL.7d.5	Mmp16	5.03429	6.39127	-1.35697	0	0
IL12mRNA.7d.05/NS.CTL.7d.5	Mmp23	7.39922	5.53987	1.85935	0	0
IL12mRNA.7d.05/NS.CTL.7d.5	Mmp3	9.46695	6.09361	3.37334	0	0
IL12mRNA.7d.05/NS.CTL.7d.5	Mmp8	6.85345	4.31143	2.54202	0	0
IL12mRNA.7d.05/NS.CTL.7d.5	Mmp9	8.0615	9.93186	-1.87036	0	0
IL12mRNA.7d.05/NS.CTL.7d.5	Mns1	6.65245	7.68294	-1.03049	0	0
IL12mRNA.7d.05/NS.CTL.7d.5	Mocos	7.53553	6.30515	1.23039	0	0
IL12mRNA.7d.05/NS.CTL.7d.5	Mpeg1	12.1859	10.3211	1.86486	0	0
IL12mRNA.7d.05/NS.CTL.7d.5	Mpz	6.87997	5.57479	1.30518	0	0
IL12mRNA.7d.05/NS.CTL.7d.5	Mrap	5.97039	4.50928	1.46111	0	0
IL12mRNA.7d.05/NS.CTL.7d.5	Mrc1	9.37886	6.81886	2.56001	0	0
IL12mRNA.7d.05/NS.CTL.7d.5	Mrpl38	5.99497	6.99669	-1.00173	0.001	0.003
IL12mRNA.7d.05/NS.CTL.7d.5	Mrpl50	6.25262	7.25744	-1.00482	0	0
IL12mRNA.7d.05/NS.CTL.7d.5	Ms4a4b	10.7101	6.82992	3.88018	0	0
IL12mRNA.7d.05/NS.CTL.7d.5	Ms4a6b	7.11205	5.86849	1.24356	0.012	0.025
IL12mRNA.7d.05/NS.CTL.7d.5	Ms4a6c	10.4024	9.32147	1.08093	0	0
IL12mRNA.7d.05/NS.CTL.7d.5	Ms4a6d	9.05503	7.84721	1.20782	0	0
IL12mRNA.7d.05/NS.CTL.7d.5	Ms4a8a	7.66076	4.7889	2.87186	0	0
IL12mRNA.7d.05/NS.CTL.7d.5	Msmo1	9.96609	11.0711	-1.10499	0	0
IL12mRNA.7d.05/NS.CTL.7d.5	Msr1	9.33719	7.68219	1.65501	0	0
IL12mRNA.7d.05/NS.CTL.7d.5	Mvd	7.52257	8.54136	-1.01878	0.002	0.006
IL12mRNA.7d.05/NS.CTL.7d.5	Mxd3	5.82246	6.84845	-1.026	0	0
IL12mRNA.7d.05/NS.CTL.7d.5	Myh10	7.29158	5.62329	1.6683	0	0
IL12mRNA.7d.05/NS.CTL.7d.5	Myo1f	7.74142	5.29494	2.44647	0	0
IL12mRNA.7d.05/NS.CTL.7d.5	Myo1g	8.91224	7.21787	1.69437	0	0
IL12mRNA.7d.05/NS.CTL.7d.5	N4bp2l1	6.91603	5.646	1.27004	0	0
IL12mRNA.7d.05/NS.CTL.7d.5	Naaa	10.4466	8.58553	1.86102	0	0
IL12mRNA.7d.05/NS.CTL.7d.5	Naalad2	6.4281	7.48369	-1.0556	0.003	0.008
IL12mRNA.7d.05/NS.CTL.7d.5	Nabp1	5.60378	4.52897	1.07481	0.007	0.016
IL12mRNA.7d.05/NS.CTL.7d.5	Nacc2	6.58118	5.40443	1.17675	0	0
IL12mRNA.7d.05/NS.CTL.7d.5	Nap1l3	4.39479	6.16109	-1.7663	0	0
IL12mRNA.7d.05/NS.CTL.7d.5	Napsa	7.67288	6.36282	1.31007	0	0
IL12mRNA.7d.05/NS.CTL.7d.5	Nav1	6.06559	7.24729	-1.18169	0.001	0.003
IL12mRNA.7d.05/NS.CTL.7d.5	Nbeal2	7.08515	5.94085	1.14429	0	0
IL12mRNA.7d.05/NS.CTL.7d.5	Ncf1	7.83852	6.06989	1.76863	0	0
IL12mRNA.7d.05/NS.CTL.7d.5	Ncf2	8.92304	7.17795	1.74509	0	0
IL12mRNA.7d.05/NS.CTL.7d.5	Ncf4	9.26259	7.58665	1.67594	0	0
IL12mRNA.7d.05/NS.CTL.7d.5	Ndc1	5.25107	6.33947	-1.0884	0	0
IL12mRNA.7d.05/NS.CTL.7d.5	Ndn	6.17284	3.62543	2.54741	0	0
IL12mRNA.7d.05/NS.CTL.7d.5	Neat1	11.3392	9.93202	1.40714	0	0
IL12mRNA.7d.05/NS.CTL.7d.5	Nectin3	6.57712	8.5751	-1.99798	0	0
IL12mRNA.7d.05/NS.CTL.7d.5	Nemf	5.83698	7.00286	-1.16588	0	0
IL12mRNA.7d.05/NS.CTL.7d.5	Nfatc2	8.18377	6.86003	1.32373	0	0
IL12mRNA.7d.05/NS.CTL.7d.5	Nhsl2	6.2598	5.22512	1.03468	0	0
IL12mRNA.7d.05/NS.CTL.7d.5	Nid1	9.58546	7.94133	1.64413	0	0
IL12mRNA.7d.05/NS.CTL.7d.5	Ninj1	11.6929	9.29638	2.39655	0	0
IL12mRNA.7d.05/NS.CTL.7d.5	Ninl	6.04706	7.20317	-1.15611	0.002	0.006
IL12mRNA.7d.05/NS.CTL.7d.5	Nkg7	9.95931	6.80526	3.15405	0	0
IL12mRNA.7d.05/NS.CTL.7d.5	Nlrc3	5.12117	3.35022	1.77095	0	0
IL12mRNA.7d.05/NS.CTL.7d.5	Nmt2	8.29233	9.36044	-1.06811	0	0
IL12mRNA.7d.05/NS.CTL.7d.5	Nnmt	8.63026	7.55563	1.07463	0	0
IL12mRNA.7d.05/NS.CTL.7d.5	Nod1	8.53427	7.50288	1.0314	0	0
IL12mRNA.7d.05/NS.CTL.7d.5	Nos2	6.71352	5.51034	1.20317	0	0
IL12mRNA.7d.05/NS.CTL.7d.5	Npc2	8.11003	6.56353	1.54649	0	0
IL12mRNA.7d.05/NS.CTL.7d.5	Npl	6.56949	5.02925	1.54024	0.001	0.003
IL12mRNA.7d.05/NS.CTL.7d.5	Nppb	7.84937	5.55631	2.29306	0	0
IL12mRNA.7d.05/NS.CTL.7d.5	Nr1h3	6.82715	5.41553	1.41162	0	0
IL12mRNA.7d.05/NS.CTL.7d.5	Nr2f1	6.47653	7.96552	-1.48899	0	0
IL12mRNA.7d.05/NS.CTL.7d.5	Nr2f2	5.62784	6.72781	-1.09998	0	0
IL12mRNA.7d.05/NS.CTL.7d.5	Nrros	9.03639	7.10535	1.93104	0	0
IL12mRNA.7d.05/NS.CTL.7d.5	Nsd1	7.62403	6.44731	1.17672	0	0
IL12mRNA.7d.05/NS.CTL.7d.5	Nt5dc2	8.39874	9.47267	-1.07393	0	0
IL12mRNA.7d.05/NS.CTL.7d.5	Nuak2	8.0441	6.40709	1.637	0	0
IL12mRNA.7d.05/NS.CTL.7d.5	Nudt21	5.77005	7.05437	-1.28432	0	0
IL12mRNA.7d.05/NS.CTL.7d.5	Nup210	7.79018	5.89757	1.89262	0	0
IL12mRNA.7d.05/NS.CTL.7d.5	Nxf3	8.67448	9.97152	-1.29704	0	0
IL12mRNA.7d.05/NS.CTL.7d.5	Olfml2b	7.16397	8.27314	-1.10917	0.007	0.016
IL12mRNA.7d.05/NS.CTL.7d.5	Oplah	5.75522	4.59715	1.15808	0	0
IL12mRNA.7d.05/NS.CTL.7d.5	Orc4	5.65392	6.66694	-1.01302	0.003	0.008
IL12mRNA.7d.05/NS.CTL.7d.5	Orm1	7.1691	5.40167	1.76743	0	0
IL12mRNA.7d.05/NS.CTL.7d.5	Osgepl1	6.6167	7.9687	-1.352	0	0
IL12mRNA.7d.05/NS.CTL.7d.5	Osr1	8.08332	9.3681	-1.28478	0	0
IL12mRNA.7d.05/NS.CTL.7d.5	Osr2	5.21554	6.6477	-1.43217	0	0
IL12mRNA.7d.05/NS.CTL.7d.5	Otud4	7.93044	8.9741	-1.04366	0.001	0.003
IL12mRNA.7d.05/NS.CTL.7d.5	Otud7b	6.62577	7.71559	-1.08982	0	0
IL12mRNA.7d.05/NS.CTL.7d.5	P2ry10	5.88185	4.04348	1.83837	0	0
IL12mRNA.7d.05/NS.CTL.7d.5	P2ry13	6.99646	5.64764	1.34882	0	0
IL12mRNA.7d.05/NS.CTL.7d.5	P2ry14	7.11073	5.15702	1.95371	0	0
IL12mRNA.7d.05/NS.CTL.7d.5	P2ry6	9.30123	7.83982	1.46141	0	0
IL12mRNA.7d.05/NS.CTL.7d.5	P3h3	7.47046	8.52021	-1.04975	0	0
IL12mRNA.7d.05/NS.CTL.7d.5	Pag1	6.89009	5.4624	1.42768	0.001	0.003
IL12mRNA.7d.05/NS.CTL.7d.5	Papss2	8.06418	5.98321	2.08097	0	0
IL12mRNA.7d.05/NS.CTL.7d.5	Parm1	4.88299	3.73734	1.14564	0	0
IL12mRNA.7d.05/NS.CTL.7d.5	Parvg	7.71589	6.17159	1.5443	0	0
IL12mRNA.7d.05/NS.CTL.7d.5	Pbxip1	7.75693	6.06277	1.69416	0	0
IL12mRNA.7d.05/NS.CTL.7d.5	Pcdh18	7.6913	9.31302	-1.62172	0	0
IL12mRNA.7d.05/NS.CTL.7d.5	Pcdhb17	4.82705	6.36805	-1.541	0	0
IL12mRNA.7d.05/NS.CTL.7d.5	Pcdhb22	4.8409	6.29396	-1.45306	0	0
IL12mRNA.7d.05/NS.CTL.7d.5	Pck1	6.01622	3.65353	2.3627	0	0
IL12mRNA.7d.05/NS.CTL.7d.5	Pclaf	8.27737	9.30964	-1.03227	0	0
IL12mRNA.7d.05/NS.CTL.7d.5	Pcm1	5.93994	7.12357	-1.18363	0	0
IL12mRNA.7d.05/NS.CTL.7d.5	Pcsk5	7.2098	5.6848	1.525	0.001	0.003
IL12mRNA.7d.05/NS.CTL.7d.5	Pctp	6.06179	4.74205	1.31974	0	0
IL12mRNA.7d.05/NS.CTL.7d.5	Pdcd1	5.75512	4.13981	1.6153	0	0
IL12mRNA.7d.05/NS.CTL.7d.5	Pdcd1lg2	6.31106	4.78963	1.52142	0	0
IL12mRNA.7d.05/NS.CTL.7d.5	Pde3b	8.01905	6.50158	1.51747	0	0
IL12mRNA.7d.05/NS.CTL.7d.5	Pde4b	6.8851	5.42893	1.45617	0	0
IL12mRNA.7d.05/NS.CTL.7d.5	Pde7b	7.82515	6.23579	1.58936	0	0
IL12mRNA.7d.05/NS.CTL.7d.5	Pde8a	7.51024	6.11685	1.39339	0	0
IL12mRNA.7d.05/NS.CTL.7d.5	Pdgfc	8.63362	7.39718	1.23644	0.001	0.003
IL12mRNA.7d.05/NS.CTL.7d.5	Pdgfd	5.04442	3.57038	1.47404	0	0
IL12mRNA.7d.05/NS.CTL.7d.5	Pdgfrb	9.69218	10.9358	-1.24359	0.001	0.003
IL12mRNA.7d.05/NS.CTL.7d.5	Pdlim1	9.25589	7.97324	1.28265	0	0
IL12mRNA.7d.05/NS.CTL.7d.5	Pdlim4	8.33091	6.16583	2.16507	0	0
IL12mRNA.7d.05/NS.CTL.7d.5	Pdpn	10.127	7.55302	2.574	0	0
IL12mRNA.7d.05/NS.CTL.7d.5	Pdzrn3	6.49081	4.93726	1.55355	0.004	0.01
IL12mRNA.7d.05/NS.CTL.7d.5	Pecam1	7.44763	6.24073	1.2069	0	0
IL12mRNA.7d.05/NS.CTL.7d.5	Pet2	6.9702	8.55575	-1.58555	0	0
IL12mRNA.7d.05/NS.CTL.7d.5	Pf4	9.96545	8.51286	1.45259	0	0
IL12mRNA.7d.05/NS.CTL.7d.5	Pfn2	8.09667	9.14379	-1.04712	0	0
IL12mRNA.7d.05/NS.CTL.7d.5	Pgap1	4.77354	2.8757	1.89784	0	0
IL12mRNA.7d.05/NS.CTL.7d.5	Pgbd5	5.33152	3.93686	1.39466	0	0
IL12mRNA.7d.05/NS.CTL.7d.5	Pglyrp1	6.53664	5.2171	1.31954	0	0
IL12mRNA.7d.05/NS.CTL.7d.5	Pglyrp2	4.9611	3.82409	1.137	0	0
IL12mRNA.7d.05/NS.CTL.7d.5	Phactr2	5.98641	4.47816	1.50825	0.001	0.003
IL12mRNA.7d.05/NS.CTL.7d.5	Pi16	8.72147	5.83664	2.88483	0	0
IL12mRNA.7d.05/NS.CTL.7d.5	Pid1	9.75999	7.74371	2.01629	0	0
IL12mRNA.7d.05/NS.CTL.7d.5	Pigp	8.31523	9.50397	-1.18874	0	0
IL12mRNA.7d.05/NS.CTL.7d.5	Pik3ap1	8.17318	7.02232	1.15086	0	0
IL12mRNA.7d.05/NS.CTL.7d.5	Pik3cd	7.97879	5.96417	2.01462	0	0
IL12mRNA.7d.05/NS.CTL.7d.5	Pik3cg	7.07189	5.65026	1.42163	0	0
IL12mRNA.7d.05/NS.CTL.7d.5	Pik3r5	8.08875	6.11216	1.97659	0	0
IL12mRNA.7d.05/NS.CTL.7d.5	Pik3r6	8.60448	7.491	1.11348	0	0
IL12mRNA.7d.05/NS.CTL.7d.5	Pilra	8.56203	6.6784	1.88363	0	0
IL12mRNA.7d.05/NS.CTL.7d.5	Pilrb1	8.49625	6.90443	1.59181	0	0
IL12mRNA.7d.05/NS.CTL.7d.5	Pim1	9.65604	7.74258	1.91346	0	0
IL12mRNA.7d.05/NS.CTL.7d.5	Pirb	9.49648	6.47421	3.02226	0	0
IL12mRNA.7d.05/NS.CTL.7d.5	Pisd-ps3	5.65328	6.69808	-1.04481	0	0
IL12mRNA.7d.05/NS.CTL.7d.5	Piwil4	4.86678	5.88135	-1.01458	0.002	0.006
IL12mRNA.7d.05/NS.CTL.7d.5	Pkp3	6.77811	5.72618	1.05193	0	0
IL12mRNA.7d.05/NS.CTL.7d.5	Pla1a	10.336	8.9405	1.39549	0	0
IL12mRNA.7d.05/NS.CTL.7d.5	Pla2g7	11.5858	8.98087	2.60497	0	0
IL12mRNA.7d.05/NS.CTL.7d.5	Plac1	4.4599	5.61024	-1.15034	0.001	0.003
IL12mRNA.7d.05/NS.CTL.7d.5	Plac8	11.5411	9.91942	1.62171	0	0
IL12mRNA.7d.05/NS.CTL.7d.5	Plbd1	10.4833	8.36452	2.11882	0	0
IL12mRNA.7d.05/NS.CTL.7d.5	Pld1	5.51223	6.79685	-1.28462	0	0
IL12mRNA.7d.05/NS.CTL.7d.5	Pld3	9.62388	8.5665	1.05738	0	0
IL12mRNA.7d.05/NS.CTL.7d.5	Pld4	10.034	8.14561	1.88837	0	0
IL12mRNA.7d.05/NS.CTL.7d.5	Plek	9.40435	7.8417	1.56265	0	0
IL12mRNA.7d.05/NS.CTL.7d.5	Plekho1	8.54634	7.1845	1.36184	0	0
IL12mRNA.7d.05/NS.CTL.7d.5	Plin2	12.5553	11.3118	1.24351	0	0
IL12mRNA.7d.05/NS.CTL.7d.5	Plin4	8.42474	5.72813	2.69661	0	0
IL12mRNA.7d.05/NS.CTL.7d.5	Plscr4	5.45901	6.48788	-1.02888	0	0
IL12mRNA.7d.05/NS.CTL.7d.5	Pltp	11.3676	9.98764	1.37992	0	0
IL12mRNA.7d.05/NS.CTL.7d.5	Plvap	9.82255	8.42456	1.39799	0	0
IL12mRNA.7d.05/NS.CTL.7d.5	Plxdc2	6.68634	4.92594	1.7604	0	0
IL12mRNA.7d.05/NS.CTL.7d.5	Plxnb1	5.42387	6.53263	-1.10875	0	0
IL12mRNA.7d.05/NS.CTL.7d.5	Pmaip1	6.24211	4.90468	1.33742	0	0
IL12mRNA.7d.05/NS.CTL.7d.5	Pnn	5.99065	7.30116	-1.3105	0.018	0.034
IL12mRNA.7d.05/NS.CTL.7d.5	Pnpla2	9.19454	8.03426	1.16028	0	0
IL12mRNA.7d.05/NS.CTL.7d.5	Polr1a	6.52189	7.76016	-1.23827	0	0
IL12mRNA.7d.05/NS.CTL.7d.5	Postn	11.4405	9.7416	1.69892	0.003	0.008
IL12mRNA.7d.05/NS.CTL.7d.5	Pparg	5.88652	4.71975	1.16677	0	0
IL12mRNA.7d.05/NS.CTL.7d.5	Ppp1r16b	6.99677	5.66822	1.32855	0	0
IL12mRNA.7d.05/NS.CTL.7d.5	Ppp3ca	8.63239	9.64219	-1.0098	0.001	0.003
IL12mRNA.7d.05/NS.CTL.7d.5	Ppt2	10.0259	8.89555	1.13036	0	0
IL12mRNA.7d.05/NS.CTL.7d.5	Prdm16	5.0925	6.2878	-1.19531	0	0
IL12mRNA.7d.05/NS.CTL.7d.5	Prdm5	5.51822	6.57444	-1.05622	0.001	0.003
IL12mRNA.7d.05/NS.CTL.7d.5	Prdx5	11.5272	10.3754	1.15183	0	0
IL12mRNA.7d.05/NS.CTL.7d.5	Prelp	7.76876	5.44707	2.32169	0	0
IL12mRNA.7d.05/NS.CTL.7d.5	Prex1	8.14751	6.38354	1.76397	0	0
IL12mRNA.7d.05/NS.CTL.7d.5	Prg4	8.33357	6.23949	2.09408	0	0
IL12mRNA.7d.05/NS.CTL.7d.5	Prickle1	5.2403	4.21011	1.03019	0	0
IL12mRNA.7d.05/NS.CTL.7d.5	Prkcb	8.90114	7.33262	1.56852	0	0
IL12mRNA.7d.05/NS.CTL.7d.5	Prkcq	6.86885	5.48107	1.38778	0	0
IL12mRNA.7d.05/NS.CTL.7d.5	Prkd2	5.7608	4.4226	1.3382	0	0
IL12mRNA.7d.05/NS.CTL.7d.5	Prmt1	10.5912	11.6186	-1.0274	0.003	0.008
IL12mRNA.7d.05/NS.CTL.7d.5	Prpf19	8.51949	9.55034	-1.03085	0.002	0.006
IL12mRNA.7d.05/NS.CTL.7d.5	Prr5l	6.67733	5.48277	1.19455	0	0
IL12mRNA.7d.05/NS.CTL.7d.5	Prrx2	5.60137	6.90627	-1.30489	0	0
IL12mRNA.7d.05/NS.CTL.7d.5	Prss23	7.98922	6.93727	1.05195	0.002	0.006
IL12mRNA.7d.05/NS.CTL.7d.5	Prss46	5.67418	4.62106	1.05312	0	0
IL12mRNA.7d.05/NS.CTL.7d.5	Psap	12.5043	10.7981	1.70618	0	0
IL12mRNA.7d.05/NS.CTL.7d.5	Psmc6	5.48328	7.09497	-1.61169	0	0
IL12mRNA.7d.05/NS.CTL.7d.5	Pstpip1	8.70274	6.74699	1.95575	0	0
IL12mRNA.7d.05/NS.CTL.7d.5	Pstpip2	7.45683	5.21229	2.24454	0	0
IL12mRNA.7d.05/NS.CTL.7d.5	Ptger2	6.25886	3.85735	2.40151	0	0
IL12mRNA.7d.05/NS.CTL.7d.5	Ptger4	7.91729	6.22917	1.68811	0	0
IL12mRNA.7d.05/NS.CTL.7d.5	Ptges	8.49211	9.66813	-1.17602	0	0
IL12mRNA.7d.05/NS.CTL.7d.5	Ptgir	6.61667	5.35271	1.26396	0	0
IL12mRNA.7d.05/NS.CTL.7d.5	Ptgr1	8.58414	6.59678	1.98735	0	0
IL12mRNA.7d.05/NS.CTL.7d.5	Ptgs2	7.90107	6.05135	1.84971	0	0
IL12mRNA.7d.05/NS.CTL.7d.5	Pth1r	5.85399	4.52405	1.32994	0	0
IL12mRNA.7d.05/NS.CTL.7d.5	Ptk2b	8.82718	7.37699	1.45019	0	0
IL12mRNA.7d.05/NS.CTL.7d.5	Ptpn18	10.2887	8.56286	1.72579	0	0
IL12mRNA.7d.05/NS.CTL.7d.5	Ptpn22	8.15152	5.81578	2.33574	0	0
IL12mRNA.7d.05/NS.CTL.7d.5	Ptpn6	9.3757	7.61829	1.75741	0	0
IL12mRNA.7d.05/NS.CTL.7d.5	Ptprc	6.11536	4.29769	1.81767	0	0
IL12mRNA.7d.05/NS.CTL.7d.5	Ptprcap	7.88799	6.55744	1.33054	0	0
IL12mRNA.7d.05/NS.CTL.7d.5	Ptprf	5.48553	4.18954	1.29599	0	0
IL12mRNA.7d.05/NS.CTL.7d.5	Ptprj	7.85513	6.20803	1.64711	0	0
IL12mRNA.7d.05/NS.CTL.7d.5	Ptpro	8.53497	6.37328	2.16168	0	0
IL12mRNA.7d.05/NS.CTL.7d.5	Ptx3	9.20739	5.50062	3.70676	0	0
IL12mRNA.7d.05/NS.CTL.7d.5	Pycard	10.6939	8.401	2.29293	0	0
IL12mRNA.7d.05/NS.CTL.7d.5	Pygl	8.15331	5.39553	2.75778	0	0
IL12mRNA.7d.05/NS.CTL.7d.5	Qpct	5.49637	4.24814	1.24823	0.001	0.003
IL12mRNA.7d.05/NS.CTL.7d.5	Qtrt2	7.51186	8.5811	-1.06924	0.006	0.014
IL12mRNA.7d.05/NS.CTL.7d.5	Rab27a	6.72868	4.75273	1.97596	0	0
IL12mRNA.7d.05/NS.CTL.7d.5	Rab32	8.6145	7.61257	1.00193	0.002	0.006
IL12mRNA.7d.05/NS.CTL.7d.5	Rab39b	6.49053	7.58657	-1.09605	0	0
IL12mRNA.7d.05/NS.CTL.7d.5	Rab3il1	7.64216	6.56931	1.07285	0	0
IL12mRNA.7d.05/NS.CTL.7d.5	Rab4a	6.16096	7.44768	-1.28672	0.009	0.019
IL12mRNA.7d.05/NS.CTL.7d.5	Rab7b	7.94655	6.69884	1.24771	0	0
IL12mRNA.7d.05/NS.CTL.7d.5	Rabepk	5.17037	6.23336	-1.06299	0.006	0.014
IL12mRNA.7d.05/NS.CTL.7d.5	Rac2	10.5281	8.79954	1.72858	0	0
IL12mRNA.7d.05/NS.CTL.7d.5	Rad18	6.35567	7.35576	-1.00009	0.001	0.003
IL12mRNA.7d.05/NS.CTL.7d.5	Rad51ap1	6.4994	7.58417	-1.08476	0	0
IL12mRNA.7d.05/NS.CTL.7d.5	Ramp1	6.1471	5.13369	1.01342	0	0
IL12mRNA.7d.05/NS.CTL.7d.5	Ramp2	8.86486	9.92735	-1.06249	0	0
IL12mRNA.7d.05/NS.CTL.7d.5	Rarres2	10.6237	6.63617	3.98752	0	0
IL12mRNA.7d.05/NS.CTL.7d.5	Rasa4	7.70162	6.31414	1.38748	0	0
IL12mRNA.7d.05/NS.CTL.7d.5	Rasal3	7.17764	5.61399	1.56365	0	0
IL12mRNA.7d.05/NS.CTL.7d.5	Rasgrp1	7.22074	5.26333	1.95741	0	0
IL12mRNA.7d.05/NS.CTL.7d.5	Rassf2	7.66472	6.1492	1.51552	0	0
IL12mRNA.7d.05/NS.CTL.7d.5	Rassf4	8.00086	5.68165	2.31921	0	0
IL12mRNA.7d.05/NS.CTL.7d.5	Rbak	7.25126	8.37731	-1.12605	0.002	0.006
IL12mRNA.7d.05/NS.CTL.7d.5	Rbfox1	3.92097	5.19598	-1.27501	0.001	0.003
IL12mRNA.7d.05/NS.CTL.7d.5	Rbm47	7.25957	5.45963	1.79995	0	0
IL12mRNA.7d.05/NS.CTL.7d.5	Rbp4	5.83511	4.38056	1.45455	0.001	0.003
IL12mRNA.7d.05/NS.CTL.7d.5	Rbpms	7.31203	5.913	1.39903	0	0
IL12mRNA.7d.05/NS.CTL.7d.5	Rcsd1	7.50476	6.41437	1.09039	0	0
IL12mRNA.7d.05/NS.CTL.7d.5	Rdh11	7.45499	8.7664	-1.31141	0	0
IL12mRNA.7d.05/NS.CTL.7d.5	Rec114	7.09417	8.25375	-1.15958	0	0
IL12mRNA.7d.05/NS.CTL.7d.5	Reck	5.497	4.15576	1.34123	0.001	0.003
IL12mRNA.7d.05/NS.CTL.7d.5	Retn	9.85557	6.93298	2.92259	0	0
IL12mRNA.7d.05/NS.CTL.7d.5	Rfc4	7.65726	8.66328	-1.00603	0.001	0.003
IL12mRNA.7d.05/NS.CTL.7d.5	Rftn1	8.56185	6.95571	1.60615	0	0
IL12mRNA.7d.05/NS.CTL.7d.5	Rgl1	7.59373	6.40844	1.18529	0	0
IL12mRNA.7d.05/NS.CTL.7d.5	Rgs1	8.71494	7.13438	1.58056	0	0
IL12mRNA.7d.05/NS.CTL.7d.5	Rhog	9.91318	8.91284	1.00034	0	0
IL12mRNA.7d.05/NS.CTL.7d.5	Rhoh	5.89409	4.81991	1.07418	0	0
IL12mRNA.7d.05/NS.CTL.7d.5	Rhov	6.55413	4.33359	2.22054	0	0
IL12mRNA.7d.05/NS.CTL.7d.5	Rinl	6.60699	4.58665	2.02035	0	0
IL12mRNA.7d.05/NS.CTL.7d.5	Ripk3	7.75456	6.11774	1.63683	0	0
IL12mRNA.7d.05/NS.CTL.7d.5	Ripor2	6.51654	4.62519	1.89135	0	0
IL12mRNA.7d.05/NS.CTL.7d.5	Rnase6	6.07518	4.42121	1.65397	0	0
IL12mRNA.7d.05/NS.CTL.7d.5	Rnf113a2	5.34192	4.0156	1.32632	0	0
IL12mRNA.7d.05/NS.CTL.7d.5	Rnf128	8.22994	6.70384	1.5261	0	0
IL12mRNA.7d.05/NS.CTL.7d.5	Rnf130	10.4191	9.03719	1.3819	0	0
IL12mRNA.7d.05/NS.CTL.7d.5	Rnf144a	6.86209	5.80797	1.05412	0	0
IL12mRNA.7d.05/NS.CTL.7d.5	Rnf207	5.01489	6.26953	-1.25465	0	0
IL12mRNA.7d.05/NS.CTL.7d.5	Rnpc3	5.6734	6.75134	-1.07794	0.001	0.003
IL12mRNA.7d.05/NS.CTL.7d.5	Robo1	3.95181	5.37894	-1.42713	0.002	0.006
IL12mRNA.7d.05/NS.CTL.7d.5	Rora	7.2964	4.74305	2.55335	0	0
IL12mRNA.7d.05/NS.CTL.7d.5	Rpa3	8.94476	10.1646	-1.21987	0.002	0.006
IL12mRNA.7d.05/NS.CTL.7d.5	Rpl12	7.93136	8.94326	-1.0119	0.01	0.021
IL12mRNA.7d.05/NS.CTL.7d.5	Rpl27a	10.0999	8.42258	1.67735	0	0
IL12mRNA.7d.05/NS.CTL.7d.5	Rps4l	6.31813	4.93759	1.38054	0.004	0.01
IL12mRNA.7d.05/NS.CTL.7d.5	Rps6ka6	7.88881	9.2895	-1.40069	0.001	0.003
IL12mRNA.7d.05/NS.CTL.7d.5	Rtl3	5.67239	6.76293	-1.09054	0	0
IL12mRNA.7d.05/NS.CTL.7d.5	S100a16	8.73248	6.91519	1.81729	0	0
IL12mRNA.7d.05/NS.CTL.7d.5	S100a8	9.47024	5.53084	3.93941	0	0
IL12mRNA.7d.05/NS.CTL.7d.5	S100a9	8.82892	4.59918	4.22974	0	0
IL12mRNA.7d.05/NS.CTL.7d.5	S1pr3	9.11692	7.37128	1.74563	0	0
IL12mRNA.7d.05/NS.CTL.7d.5	Saa3	12.5914	7.24923	5.34214	0	0
IL12mRNA.7d.05/NS.CTL.7d.5	Samhd1	8.54256	7.04907	1.49349	0	0
IL12mRNA.7d.05/NS.CTL.7d.5	Sash1	10.1778	8.46841	1.70938	0	0
IL12mRNA.7d.05/NS.CTL.7d.5	Sash3	8.51131	6.77066	1.74064	0	0
IL12mRNA.7d.05/NS.CTL.7d.5	Satb1	5.63575	3.70622	1.92953	0.001	0.003
IL12mRNA.7d.05/NS.CTL.7d.5	Sbsn	7.85221	6.62866	1.22355	0	0
IL12mRNA.7d.05/NS.CTL.7d.5	Scara5	8.83247	9.93769	-1.10523	0.001	0.003
IL12mRNA.7d.05/NS.CTL.7d.5	Scarb1	8.02152	9.2325	-1.21098	0	0
IL12mRNA.7d.05/NS.CTL.7d.5	Scarf1	6.91807	5.44203	1.47604	0	0
IL12mRNA.7d.05/NS.CTL.7d.5	Scd2	8.21647	9.70646	-1.48999	0	0
IL12mRNA.7d.05/NS.CTL.7d.5	Scn7a	6.60134	5.08301	1.51833	0	0
IL12mRNA.7d.05/NS.CTL.7d.5	Sdc2	8.37319	9.464	-1.09081	0	0
IL12mRNA.7d.05/NS.CTL.7d.5	Sec16b	5.86986	7.78743	-1.91757	0	0
IL12mRNA.7d.05/NS.CTL.7d.5	Sectm1a	6.31655	4.54944	1.76711	0	0
IL12mRNA.7d.05/NS.CTL.7d.5	Selenop	12.4826	10.0981	2.38459	0	0
IL12mRNA.7d.05/NS.CTL.7d.5	Sell	7.63141	5.93098	1.70043	0	0
IL12mRNA.7d.05/NS.CTL.7d.5	Selp	5.64337	4.16699	1.47637	0	0
IL12mRNA.7d.05/NS.CTL.7d.5	Selplg	10.4239	8.56301	1.86085	0	0
IL12mRNA.7d.05/NS.CTL.7d.5	Sema3a	4.8872	6.53347	-1.64628	0	0
IL12mRNA.7d.05/NS.CTL.7d.5	Sema3c	6.91664	4.47225	2.44439	0	0
IL12mRNA.7d.05/NS.CTL.7d.5	Sema4a	8.10606	6.21011	1.89595	0	0
IL12mRNA.7d.05/NS.CTL.7d.5	Sema4d	9.01826	7.41334	1.60492	0	0
IL12mRNA.7d.05/NS.CTL.7d.5	Sema4f	5.11784	3.83555	1.28229	0	0
IL12mRNA.7d.05/NS.CTL.7d.5	2018-09-01	6.17062	4.60261	1.56802	0	0
IL12mRNA.7d.05/NS.CTL.7d.5	2018-09-03	4.7642	3.52115	1.24305	0	0
IL12mRNA.7d.05/NS.CTL.7d.5	Serf1	6.48997	7.61208	-1.12211	0	0
IL12mRNA.7d.05/NS.CTL.7d.5	Serpina3c	4.87437	3.29512	1.57926	0	0
IL12mRNA.7d.05/NS.CTL.7d.5	Serpina3g	11.0969	8.66296	2.43398	0	0
IL12mRNA.7d.05/NS.CTL.7d.5	Serpina3m	4.94969	3.84848	1.10121	0.001	0.003
IL12mRNA.7d.05/NS.CTL.7d.5	Serpina3n	9.74786	6.68355	3.0643	0	0
IL12mRNA.7d.05/NS.CTL.7d.5	Serpinb1a	6.91541	5.52096	1.39445	0	0
IL12mRNA.7d.05/NS.CTL.7d.5	Serpinb2	5.99738	3.82503	2.17235	0	0
IL12mRNA.7d.05/NS.CTL.7d.5	Serpinb6b	7.2525	5.94194	1.31056	0	0
IL12mRNA.7d.05/NS.CTL.7d.5	Serping1	11.8512	7.92959	3.92164	0	0
IL12mRNA.7d.05/NS.CTL.7d.5	Sertad4	5.4172	8.4404	-3.0232	0	0
IL12mRNA.7d.05/NS.CTL.7d.5	Setd5	5.04596	6.47687	-1.43091	0.002	0.006
IL12mRNA.7d.05/NS.CTL.7d.5	Sf3a1	6.763	7.84404	-1.08104	0.025	0.045
IL12mRNA.7d.05/NS.CTL.7d.5	Sfrp1	5.91918	3.66962	2.24956	0	0
IL12mRNA.7d.05/NS.CTL.7d.5	Sfrp2	8.25872	5.67016	2.58856	0.001	0.003
IL12mRNA.7d.05/NS.CTL.7d.5	Sfrp4	7.48487	5.97866	1.50622	0	0
IL12mRNA.7d.05/NS.CTL.7d.5	Sgk3	7.49676	6.26436	1.2324	0.001	0.003
IL12mRNA.7d.05/NS.CTL.7d.5	Sgo1	7.22089	8.23352	-1.01263	0.005	0.012
IL12mRNA.7d.05/NS.CTL.7d.5	Sh2d1a	5.71813	3.10613	2.612	0	0
IL12mRNA.7d.05/NS.CTL.7d.5	Sh3d19	5.77813	6.87059	-1.09246	0	0
IL12mRNA.7d.05/NS.CTL.7d.5	Shtn1	8.30075	5.69551	2.60525	0	0
IL12mRNA.7d.05/NS.CTL.7d.5	Sirpa	9.6948	7.74775	1.94705	0	0
IL12mRNA.7d.05/NS.CTL.7d.5	Sirpb1a	9.79975	7.7804	2.01934	0	0
IL12mRNA.7d.05/NS.CTL.7d.5	Skap1	6.32596	4.07328	2.25268	0	0
IL12mRNA.7d.05/NS.CTL.7d.5	Sla	8.28905	6.90532	1.38373	0.001	0.003
IL12mRNA.7d.05/NS.CTL.7d.5	Slamf1	6.56587	4.77393	1.79194	0	0
IL12mRNA.7d.05/NS.CTL.7d.5	Slamf6	5.12383	3.92405	1.19978	0	0
IL12mRNA.7d.05/NS.CTL.7d.5	Slamf7	8.2357	5.90016	2.33554	0	0
IL12mRNA.7d.05/NS.CTL.7d.5	Slamf8	9.77671	7.59973	2.17697	0	0
IL12mRNA.7d.05/NS.CTL.7d.5	Slc10a6	6.74289	5.55547	1.18742	0	0
IL12mRNA.7d.05/NS.CTL.7d.5	Slc11a1	10.1138	7.83657	2.27725	0	0
IL12mRNA.7d.05/NS.CTL.7d.5	Slc13a3	7.54499	5.50505	2.03994	0	0
IL12mRNA.7d.05/NS.CTL.7d.5	Slc15a3	10.0266	8.62764	1.39893	0	0
IL12mRNA.7d.05/NS.CTL.7d.5	Slc17a6	4.74834	3.57599	1.17235	0.001	0.003
IL12mRNA.7d.05/NS.CTL.7d.5	Slc1a3	4.68474	3.14662	1.53812	0	0
IL12mRNA.7d.05/NS.CTL.7d.5	Slc25a37	9.76319	8.49976	1.26343	0	0
IL12mRNA.7d.05/NS.CTL.7d.5	Slc2a3	7.02396	4.76165	2.2623	0	0
IL12mRNA.7d.05/NS.CTL.7d.5	Slc30a1	8.35214	7.27111	1.08103	0	0
IL12mRNA.7d.05/NS.CTL.7d.5	Slc31a2	8.47847	7.19566	1.28281	0	0
IL12mRNA.7d.05/NS.CTL.7d.5	Slc35a1	6.60772	7.71593	-1.10821	0.003	0.008
IL12mRNA.7d.05/NS.CTL.7d.5	Slc36a2	7.14965	5.73501	1.41463	0	0
IL12mRNA.7d.05/NS.CTL.7d.5	Slc37a2	7.20848	6.20477	1.00371	0	0
IL12mRNA.7d.05/NS.CTL.7d.5	Slc39a10	6.01707	7.29502	-1.27795	0	0
IL12mRNA.7d.05/NS.CTL.7d.5	Slc43a2	9.33817	7.07544	2.26273	0	0
IL12mRNA.7d.05/NS.CTL.7d.5	Slc48a1	9.16929	7.91937	1.24992	0	0
IL12mRNA.7d.05/NS.CTL.7d.5	Slc7a11	7.5053	5.9514	1.5539	0	0
IL12mRNA.7d.05/NS.CTL.7d.5	Slc7a2	8.00972	5.46236	2.54736	0	0
IL12mRNA.7d.05/NS.CTL.7d.5	Slc7a8	7.58184	5.86801	1.71383	0	0
IL12mRNA.7d.05/NS.CTL.7d.5	Slc9a3r1	10.1734	8.88548	1.28792	0	0
IL12mRNA.7d.05/NS.CTL.7d.5	Slc9a9	6.81758	5.1136	1.70398	0	0
IL12mRNA.7d.05/NS.CTL.7d.5	Slco1a5	7.49785	8.74721	-1.24936	0	0
IL12mRNA.7d.05/NS.CTL.7d.5	Slco3a1	8.06635	6.81852	1.24783	0	0
IL12mRNA.7d.05/NS.CTL.7d.5	Slfn1	8.24152	7.02148	1.22004	0.001	0.003
IL12mRNA.7d.05/NS.CTL.7d.5	Slfn2	10.7435	9.11638	1.62711	0	0
IL12mRNA.7d.05/NS.CTL.7d.5	Slfn4	8.54457	9.67613	-1.13156	0.002	0.006
IL12mRNA.7d.05/NS.CTL.7d.5	Slit3	8.22593	6.33587	1.89006	0	0
IL12mRNA.7d.05/NS.CTL.7d.5	Slitrk5	4.93735	6.23855	-1.3012	0	0
IL12mRNA.7d.05/NS.CTL.7d.5	Slpi	10.4262	8.49183	1.93433	0	0
IL12mRNA.7d.05/NS.CTL.7d.5	Smagp	7.2888	5.72393	1.56487	0	0
IL12mRNA.7d.05/NS.CTL.7d.5	Smo	7.63046	8.74234	-1.11188	0	0
IL12mRNA.7d.05/NS.CTL.7d.5	Smox	9.05708	7.80188	1.2552	0	0
IL12mRNA.7d.05/NS.CTL.7d.5	Smpd5	6.0295	4.92888	1.10062	0	0
IL12mRNA.7d.05/NS.CTL.7d.5	Smpdl3a	9.86896	6.781	3.08796	0	0
IL12mRNA.7d.05/NS.CTL.7d.5	Snai1	7.56972	9.09616	-1.52644	0	0
IL12mRNA.7d.05/NS.CTL.7d.5	Snapc3	6.91841	7.97416	-1.05575	0	0
IL12mRNA.7d.05/NS.CTL.7d.5	Sncg	7.93572	5.89693	2.03878	0	0
IL12mRNA.7d.05/NS.CTL.7d.5	Sned1	7.5083	5.44487	2.06342	0	0
IL12mRNA.7d.05/NS.CTL.7d.5	Snhg10	7.32181	8.52183	-1.20002	0.017	0.033
IL12mRNA.7d.05/NS.CTL.7d.5	Snhg4	9.07348	10.0746	-1.00111	0	0
IL12mRNA.7d.05/NS.CTL.7d.5	Socs3	10.4818	9.15464	1.32716	0	0
IL12mRNA.7d.05/NS.CTL.7d.5	Sod2	11.5183	10.41	1.10822	0	0
IL12mRNA.7d.05/NS.CTL.7d.5	Sod3	9.17366	6.69167	2.48199	0	0
IL12mRNA.7d.05/NS.CTL.7d.5	Sorl1	5.17234	3.49451	1.67783	0	0
IL12mRNA.7d.05/NS.CTL.7d.5	Spata13	7.23633	5.84145	1.39489	0	0
IL12mRNA.7d.05/NS.CTL.7d.5	Spi1	9.80498	7.83157	1.97341	0	0
IL12mRNA.7d.05/NS.CTL.7d.5	Spib	5.66915	8.70845	-3.0393	0	0
IL12mRNA.7d.05/NS.CTL.7d.5	Spint2	6.25134	5.1593	1.09203	0.012	0.025
IL12mRNA.7d.05/NS.CTL.7d.5	Spn	7.11575	6.08623	1.02953	0	0
IL12mRNA.7d.05/NS.CTL.7d.5	Spon1	7.76858	6.30605	1.46253	0.001	0.003
IL12mRNA.7d.05/NS.CTL.7d.5	Spred2	5.41797	6.50473	-1.08676	0	0
IL12mRNA.7d.05/NS.CTL.7d.5	Spry3	5.54674	6.91511	-1.36837	0	0
IL12mRNA.7d.05/NS.CTL.7d.5	Sqle	9.00123	10.4708	-1.46954	0	0
IL12mRNA.7d.05/NS.CTL.7d.5	Sqor	8.95374	6.6715	2.28224	0	0
IL12mRNA.7d.05/NS.CTL.7d.5	Srgn	12.549	11.0436	1.50537	0	0
IL12mRNA.7d.05/NS.CTL.7d.5	Srl	5.52539	6.79101	-1.26561	0	0
IL12mRNA.7d.05/NS.CTL.7d.5	Srpx	5.88539	4.71067	1.17472	0.004	0.01
IL12mRNA.7d.05/NS.CTL.7d.5	Srsf3	8.26831	9.65199	-1.38368	0.001	0.003
IL12mRNA.7d.05/NS.CTL.7d.5	Srsf7	8.9388	9.94178	-1.00298	0.001	0.003
IL12mRNA.7d.05/NS.CTL.7d.5	Ssb	7.8487	8.91857	-1.06987	0.009	0.019
IL12mRNA.7d.05/NS.CTL.7d.5	Ssh3	6.5839	5.12856	1.45535	0	0
IL12mRNA.7d.05/NS.CTL.7d.5	St8sia4	7.91377	6.40158	1.51219	0	0
IL12mRNA.7d.05/NS.CTL.7d.5	Stab1	9.221	7.48224	1.73876	0	0
IL12mRNA.7d.05/NS.CTL.7d.5	Stard4	6.42852	8.17	-1.74148	0	0
IL12mRNA.7d.05/NS.CTL.7d.5	Stat1	7.87635	6.71242	1.16393	0	0
IL12mRNA.7d.05/NS.CTL.7d.5	Stat4	6.30615	5.09099	1.21516	0.003	0.008
IL12mRNA.7d.05/NS.CTL.7d.5	Steap4	8.08851	5.2249	2.86362	0	0
IL12mRNA.7d.05/NS.CTL.7d.5	Stfa2l1	4.19222	2.90947	1.28275	0	0
IL12mRNA.7d.05/NS.CTL.7d.5	Stk26	6.51494	4.01945	2.4955	0	0
IL12mRNA.7d.05/NS.CTL.7d.5	Sts	6.38046	5.35564	1.02482	0	0
IL12mRNA.7d.05/NS.CTL.7d.5	Stxbp6	4.47437	3.47276	1.00161	0.003	0.008
IL12mRNA.7d.05/NS.CTL.7d.5	Sulf1	7.98771	5.65129	2.33642	0	0
IL12mRNA.7d.05/NS.CTL.7d.5	Sult1a1	6.7281	4.39898	2.32912	0	0
IL12mRNA.7d.05/NS.CTL.7d.5	Suv39h2	5.12262	6.31604	-1.19343	0	0
IL12mRNA.7d.05/NS.CTL.7d.5	Svep1	7.84487	5.8414	2.00347	0	0
IL12mRNA.7d.05/NS.CTL.7d.5	Syk	9.00973	6.73307	2.27667	0	0
IL12mRNA.7d.05/NS.CTL.7d.5	Synpo	8.49307	9.52255	-1.02948	0	0
IL12mRNA.7d.05/NS.CTL.7d.5	Synpr	5.11401	6.23808	-1.12408	0.004	0.01
IL12mRNA.7d.05/NS.CTL.7d.5	Sytl2	5.60666	4.30101	1.30565	0	0
IL12mRNA.7d.05/NS.CTL.7d.5	Taf1d	8.06132	9.27703	-1.21571	0	0
IL12mRNA.7d.05/NS.CTL.7d.5	Tagln	8.57117	7.10141	1.46976	0.001	0.003
IL12mRNA.7d.05/NS.CTL.7d.5	Tbc1d10c	7.39448	5.58679	1.80769	0	0
IL12mRNA.7d.05/NS.CTL.7d.5	Tbc1d8	6.32661	5.31267	1.01395	0	0
IL12mRNA.7d.05/NS.CTL.7d.5	Tbc1d8b	7.9835	9.66863	-1.68513	0	0
IL12mRNA.7d.05/NS.CTL.7d.5	Tbx20	6.08841	7.13711	-1.0487	0.003	0.008
IL12mRNA.7d.05/NS.CTL.7d.5	Tbx21	7.61502	4.73362	2.88141	0	0
IL12mRNA.7d.05/NS.CTL.7d.5	Tbxas1	8.17804	6.25801	1.92003	0	0
IL12mRNA.7d.05/NS.CTL.7d.5	Tcf7l1	7.41111	8.8038	-1.39269	0	0
IL12mRNA.7d.05/NS.CTL.7d.5	Tcn2	10.5884	8.84871	1.73974	0	0
IL12mRNA.7d.05/NS.CTL.7d.5	Tcrb-J	8.83973	5.9495	2.89022	0	0
IL12mRNA.7d.05/NS.CTL.7d.5	Tcrg-V1	5.3076	4.11569	1.1919	0.007	0.016
IL12mRNA.7d.05/NS.CTL.7d.5	Tcrg-V4	5.05533	3.49218	1.56316	0.001	0.003
IL12mRNA.7d.05/NS.CTL.7d.5	Tenm3	7.77393	9.47918	-1.70525	0	0
IL12mRNA.7d.05/NS.CTL.7d.5	Tesc	5.26788	4.11966	1.14822	0	0
IL12mRNA.7d.05/NS.CTL.7d.5	Tex13b	8.26336	9.40615	-1.14279	0	0
IL12mRNA.7d.05/NS.CTL.7d.5	Tfec	6.66724	4.3264	2.34085	0	0
IL12mRNA.7d.05/NS.CTL.7d.5	Tgfb2	5.22899	6.55982	-1.33083	0	0
IL12mRNA.7d.05/NS.CTL.7d.5	Tgfbi	11.3238	9.89976	1.424	0	0
IL12mRNA.7d.05/NS.CTL.7d.5	Tgm2	11.4089	9.33886	2.07008	0	0
IL12mRNA.7d.05/NS.CTL.7d.5	Thbs1	7.95423	6.48588	1.46835	0	0
IL12mRNA.7d.05/NS.CTL.7d.5	Themis	6.27277	4.98978	1.28299	0	0
IL12mRNA.7d.05/NS.CTL.7d.5	Themis2	9.62288	7.51283	2.11004	0	0
IL12mRNA.7d.05/NS.CTL.7d.5	Thy1	10.4944	8.07428	2.42008	0	0
IL12mRNA.7d.05/NS.CTL.7d.5	Tia1	7.18016	8.43546	-1.2553	0.014	0.028
IL12mRNA.7d.05/NS.CTL.7d.5	Tifa	8.63014	7.609	1.02113	0	0
IL12mRNA.7d.05/NS.CTL.7d.5	Timd4	5.80712	3.89106	1.91607	0.001	0.003
IL12mRNA.7d.05/NS.CTL.7d.5	Tjp2	7.62078	8.69148	-1.07069	0	0
IL12mRNA.7d.05/NS.CTL.7d.5	Tlcd1	6.97792	8.00062	-1.0227	0	0
IL12mRNA.7d.05/NS.CTL.7d.5	Tlr1	7.7886	5.81858	1.97002	0	0
IL12mRNA.7d.05/NS.CTL.7d.5	Tlr12	6.4044	5.31818	1.08622	0	0
IL12mRNA.7d.05/NS.CTL.7d.5	Tlr13	8.4117	6.83465	1.57705	0	0
IL12mRNA.7d.05/NS.CTL.7d.5	Tlr2	8.81277	7.15609	1.65668	0	0
IL12mRNA.7d.05/NS.CTL.7d.5	Tlr4	6.46894	5.36044	1.1085	0	0
IL12mRNA.7d.05/NS.CTL.7d.5	Tmeff2	5.6065	4.39373	1.21278	0	0
IL12mRNA.7d.05/NS.CTL.7d.5	Tmem107	7.02084	8.03381	-1.01297	0.01	0.021
IL12mRNA.7d.05/NS.CTL.7d.5	Tmem140	8.93029	7.53567	1.39462	0	0
IL12mRNA.7d.05/NS.CTL.7d.5	Tmem170	5.68746	6.77829	-1.09082	0	0
IL12mRNA.7d.05/NS.CTL.7d.5	Tmem176a	9.00234	7.72404	1.2783	0	0
IL12mRNA.7d.05/NS.CTL.7d.5	Tmem216	5.68465	6.74585	-1.06119	0	0
IL12mRNA.7d.05/NS.CTL.7d.5	Tmem29	6.61309	7.69721	-1.08412	0.002	0.006
IL12mRNA.7d.05/NS.CTL.7d.5	Tmem45a	6.80715	5.28214	1.52501	0	0
IL12mRNA.7d.05/NS.CTL.7d.5	Tmem45b	4.47756	3.18015	1.2974	0	0
IL12mRNA.7d.05/NS.CTL.7d.5	Tmem47	8.35478	9.53097	-1.17619	0.01	0.021
IL12mRNA.7d.05/NS.CTL.7d.5	Tmem51	9.07538	7.12119	1.95419	0	0
IL12mRNA.7d.05/NS.CTL.7d.5	Tmem71	7.40094	5.36886	2.03208	0	0
IL12mRNA.7d.05/NS.CTL.7d.5	Tmem86a	9.83245	8.36198	1.47047	0	0
IL12mRNA.7d.05/NS.CTL.7d.5	Tmtc2	5.27454	6.76557	-1.49103	0	0
IL12mRNA.7d.05/NS.CTL.7d.5	Tnf	7.2783	6.06266	1.21564	0	0
IL12mRNA.7d.05/NS.CTL.7d.5	Tnfaip8l2	8.44865	6.5349	1.91376	0	0
IL12mRNA.7d.05/NS.CTL.7d.5	Tnfrsf13c	5.09044	6.15803	-1.06759	0	0
IL12mRNA.7d.05/NS.CTL.7d.5	Tnfrsf18	6.81108	5.66768	1.1434	0	0
IL12mRNA.7d.05/NS.CTL.7d.5	Tnfrsf1b	9.39913	7.58005	1.81908	0	0
IL12mRNA.7d.05/NS.CTL.7d.5	Tnfrsf21	7.83794	6.72607	1.11187	0	0
IL12mRNA.7d.05/NS.CTL.7d.5	Tnfrsf25	5.10377	4.05503	1.04874	0	0
IL12mRNA.7d.05/NS.CTL.7d.5	Tnni3	5.26092	3.98814	1.27278	0	0
IL12mRNA.7d.05/NS.CTL.7d.5	Tnxb	8.35763	5.51556	2.84207	0	0
IL12mRNA.7d.05/NS.CTL.7d.5	Tpd52	9.40989	8.37102	1.03886	0	0
IL12mRNA.7d.05/NS.CTL.7d.5	Tppp3	7.5757	5.32858	2.24713	0	0
IL12mRNA.7d.05/NS.CTL.7d.5	Tpsb2	6.50089	5.37652	1.12437	0.003	0.008
IL12mRNA.7d.05/NS.CTL.7d.5	Tpx2	7.38829	8.48598	-1.09768	0	0
IL12mRNA.7d.05/NS.CTL.7d.5	Trat1	4.42756	2.84131	1.58625	0	0
IL12mRNA.7d.05/NS.CTL.7d.5	Trav9d-3	7.7782	4.62506	3.15314	0	0
IL12mRNA.7d.05/NS.CTL.7d.5	Trem2	8.53861	7.26606	1.27255	0	0
IL12mRNA.7d.05/NS.CTL.7d.5	Treml4	4.92725	3.92375	1.0035	0	0
IL12mRNA.7d.05/NS.CTL.7d.5	Trim2	5.8927	7.04369	-1.15099	0	0
IL12mRNA.7d.05/NS.CTL.7d.5	Trim30d	7.41817	8.65647	-1.2383	0.005	0.012
IL12mRNA.7d.05/NS.CTL.7d.5	Trmt10a	6.17908	7.23742	-1.05834	0	0
IL12mRNA.7d.05/NS.CTL.7d.5	Trove2	6.46735	7.55979	-1.09244	0.002	0.006
IL12mRNA.7d.05/NS.CTL.7d.5	Trp53inp1	8.78307	7.45036	1.33271	0	0
IL12mRNA.7d.05/NS.CTL.7d.5	Trps1	6.27163	7.37693	-1.1053	0	0
IL12mRNA.7d.05/NS.CTL.7d.5	Tsc22d1	10.5678	12.0154	-1.44766	0	0
IL12mRNA.7d.05/NS.CTL.7d.5	Tsnax	7.63553	6.29184	1.34369	0	0
IL12mRNA.7d.05/NS.CTL.7d.5	Tspan13	8.28884	6.4037	1.88514	0	0
IL12mRNA.7d.05/NS.CTL.7d.5	Tspan32	6.8041	4.69779	2.10631	0	0
IL12mRNA.7d.05/NS.CTL.7d.5	Tspan33	5.06728	3.89155	1.17574	0	0
IL12mRNA.7d.05/NS.CTL.7d.5	Tspan6	7.03043	8.16737	-1.13694	0	0
IL12mRNA.7d.05/NS.CTL.7d.5	Tspan9	8.5385	9.88064	-1.34214	0	0
IL12mRNA.7d.05/NS.CTL.7d.5	Tspoap1	6.05748	5.04681	1.01067	0	0
IL12mRNA.7d.05/NS.CTL.7d.5	Tspyl3	5.8152	4.37323	1.44197	0	0
IL12mRNA.7d.05/NS.CTL.7d.5	Ttc3	6.77632	7.79102	-1.0147	0	0
IL12mRNA.7d.05/NS.CTL.7d.5	Ttc8	5.93585	6.95618	-1.02033	0.001	0.003
IL12mRNA.7d.05/NS.CTL.7d.5	Txnip	9.9681	8.78572	1.18238	0	0
IL12mRNA.7d.05/NS.CTL.7d.5	Txnl1	7.12609	8.23436	-1.10828	0.001	0.003
IL12mRNA.7d.05/NS.CTL.7d.5	Tyk2	7.97929	6.90094	1.07834	0	0
IL12mRNA.7d.05/NS.CTL.7d.5	Tyrobp	11.9194	10.0883	1.83113	0	0
IL12mRNA.7d.05/NS.CTL.7d.5	Tyw3	6.18513	7.35507	-1.16994	0.002	0.006
IL12mRNA.7d.05/NS.CTL.7d.5	Ubc	8.19163	6.87089	1.32075	0.001	0.003
IL12mRNA.7d.05/NS.CTL.7d.5	Ubd	10.9676	8.86975	2.09784	0	0
IL12mRNA.7d.05/NS.CTL.7d.5	Ubxn2b	5.14729	6.28456	-1.13727	0.002	0.006
IL12mRNA.7d.05/NS.CTL.7d.5	Ucp2	10.4888	8.67721	1.8116	0	0
IL12mRNA.7d.05/NS.CTL.7d.5	Unc5b	6.60045	7.84179	-1.24134	0	0
IL12mRNA.7d.05/NS.CTL.7d.5	Unc93b1	10.332	8.7163	1.61567	0	0
IL12mRNA.7d.05/NS.CTL.7d.5	Vamp7	7.18356	8.45536	-1.2718	0	0
IL12mRNA.7d.05/NS.CTL.7d.5	Vapb	7.9788	9.30249	-1.32369	0	0
IL12mRNA.7d.05/NS.CTL.7d.5	Vav1	6.2907	5.03782	1.25288	0	0
IL12mRNA.7d.05/NS.CTL.7d.5	Vcan	7.83461	5.3046	2.53001	0	0
IL12mRNA.7d.05/NS.CTL.7d.5	Vegfd	7.93668	6.15088	1.7858	0	0
IL12mRNA.7d.05/NS.CTL.7d.5	Vgll3	6.22046	4.03236	2.1881	0	0
IL12mRNA.7d.05/NS.CTL.7d.5	Vldlr	8.26668	9.45572	-1.18904	0	0
IL12mRNA.7d.05/NS.CTL.7d.5	Vsig10	6.07567	7.17408	-1.09841	0.002	0.006
IL12mRNA.7d.05/NS.CTL.7d.5	Vsig4	5.94827	4.30166	1.64661	0	0
IL12mRNA.7d.05/NS.CTL.7d.5	Vsir	9.09037	6.89738	2.19299	0	0
IL12mRNA.7d.05/NS.CTL.7d.5	Vwf	5.68504	4.5691	1.11594	0	0
IL12mRNA.7d.05/NS.CTL.7d.5	Was	8.81398	7.69691	1.11707	0	0
IL12mRNA.7d.05/NS.CTL.7d.5	Wdfy2	8.40955	7.34291	1.06663	0	0
IL12mRNA.7d.05/NS.CTL.7d.5	Wdfy4	8.27299	7.01914	1.25385	0	0
IL12mRNA.7d.05/NS.CTL.7d.5	Wfdc17	11.2252	8.56257	2.66264	0	0
IL12mRNA.7d.05/NS.CTL.7d.5	Wfdc18	7.34902	5.82409	1.52493	0	0
IL12mRNA.7d.05/NS.CTL.7d.5	Wfdc21	8.086	5.13899	2.94701	0	0
IL12mRNA.7d.05/NS.CTL.7d.5	Whrn	5.03843	6.24018	-1.20175	0	0
IL12mRNA.7d.05/NS.CTL.7d.5	Wls	7.37058	8.94386	-1.57328	0	0
IL12mRNA.7d.05/NS.CTL.7d.5	Xdh	10.4599	8.79641	1.66352	0	0
IL12mRNA.7d.05/NS.CTL.7d.5	Xist	8.41152	6.78406	1.62746	0.005	0.012
IL12mRNA.7d.05/NS.CTL.7d.5	Yes1	6.56731	7.84878	-1.28148	0.011	0.023
IL12mRNA.7d.05/NS.CTL.7d.5	Zap70	6.26257	4.78642	1.47615	0	0
IL12mRNA.7d.05/NS.CTL.7d.5	Zc3h12d	6.07241	4.86825	1.20416	0	0
IL12mRNA.7d.05/NS.CTL.7d.5	Zdhhc14	7.06821	5.37291	1.6953	0	0
IL12mRNA.7d.05/NS.CTL.7d.5	Zdhhc18	6.2685	5.13608	1.13241	0	0
IL12mRNA.7d.05/NS.CTL.7d.5	Zdhhc2	6.15528	7.23397	-1.07869	0.002	0.006
IL12mRNA.7d.05/NS.CTL.7d.5	Zfand4	6.40217	7.55829	-1.15612	0.001	0.003
IL12mRNA.7d.05/NS.CTL.7d.5	Zfhx3	7.28654	8.62067	-1.33413	0.009	0.019
IL12mRNA.7d.05/NS.CTL.7d.5	Zfhx4	5.19336	6.40412	-1.21076	0	0
IL12mRNA.7d.05/NS.CTL.7d.5	Zfp248	5.09609	6.60287	-1.50678	0	0
IL12mRNA.7d.05/NS.CTL.7d.5	Zfp326	7.60711	8.86521	-1.2581	0	0
IL12mRNA.7d.05/NS.CTL.7d.5	Zfp354c	5.65748	7.34988	-1.6924	0	0
IL12mRNA.7d.05/NS.CTL.7d.5	Zfp36	8.76753	7.74835	1.01918	0	0
IL12mRNA.7d.05/NS.CTL.7d.5	Zfp37	5.6189	6.77238	-1.15348	0	0
IL12mRNA.7d.05/NS.CTL.7d.5	Zfp41	6.49209	7.63491	-1.14282	0.004	0.01
IL12mRNA.7d.05/NS.CTL.7d.5	Zfp422	6.43086	5.41831	1.01254	0.003	0.008
IL12mRNA.7d.05/NS.CTL.7d.5	Zfp423	5.42865	6.76645	-1.3378	0.004	0.01
IL12mRNA.7d.05/NS.CTL.7d.5	Zfp518b	5.82638	4.78259	1.0438	0	0
IL12mRNA.7d.05/NS.CTL.7d.5	Zfp521	5.62868	4.47228	1.1564	0	0
IL12mRNA.7d.05/NS.CTL.7d.5	Zfp53	6.45773	7.60301	-1.14527	0.004	0.01
IL12mRNA.7d.05/NS.CTL.7d.5	Zfp617	7.85942	8.95153	-1.09211	0.005	0.012
IL12mRNA.7d.05/NS.CTL.7d.5	Zfp647	7.19411	8.24077	-1.04666	0.013	0.026
IL12mRNA.7d.05/NS.CTL.7d.5	Zfp931	7.13015	8.20086	-1.07071	0	0
IL12mRNA.7d.05/NS.CTL.7d.5	Zfp936	5.48926	6.7328	-1.24354	0	0
IL12mRNA.7d.05/NS.CTL.7d.5	Zfp946	6.3054	7.34888	-1.04348	0.004	0.01
IL12mRNA.7d.05/NS.CTL.7d.5	Zfp948	6.38868	7.66372	-1.27504	0.002	0.006
IL12mRNA.7d.05/NS.CTL.7d.5	Zfx	5.40454	6.75336	-1.34881	0	0
IL12mRNA.7d.05/NS.CTL.7d.5	Zik1	5.95069	7.01809	-1.06739	0	0
IL12mRNA.7d.05/NS.CTL.7d.5	Zmynd15	8.26901	7.24614	1.02287	0.004	0.01

## Sheet: pathway analysis 24h
Category	ID	Name	Source	p-value	q-value Bonferroni	q-value FDR B&H	q-value FDR B&Y	Hit Count in Query List	Hit Count in Genome	Hit in Query List	Mouse Gene Names
Pathway	137929	IL27-mediated signaling events	BioSystems: Pathway Interaction Database	6.581e-06	0.007568	0.007568	0.05771	5	26	IL12A,IL12B,STAT1,JAK1,IFNG	Il12a;Il12b;Stat1;Jak1;Ifng
Pathway	1269820	Mitotic Prometaphase	BioSystems: REACTOME	2.159e-05	0.02483	0.01241	0.09465	8	111	CENPA,CENPE,CLIP1,NCAPG,NDEL1,TAOK1,RANBP2,SMC2	Cenpa;Cenpe;Clip1;Ncapg;Ndel1;Taok1;Ranbp2;Smc2
Pathway	M4170	Interferon gamma pathway.	MSigDB C2 BIOCARTA (v6.0)	0.0001294	0.1489	0.04962	0.3784	3	10	STAT1,JAK1,IFNG	Stat1;Jak1;Ifng

## Sheet: pathway analysis 7d
ID	Pathway Name	Source	p-value	q-value Bonferroni	q-value FDR B&H	q-value FDR B&Y	Hit Count in Query List	Hit Count in Genome	Hit in Query List	Mouse Gene Names
1269203	Innate Immune System	BioSystems: REACTOME	4.645e-25	1.172e-21	1.172e-21	9.861e-21	199	1312	PIK3AP1,SERPINA3,ATP8B4,SPRED2,NCF1,PGLYRP2,SIRPB1,ADAM8,LRG1,MEFV,PLAC8,FABP5,CCR2,S100A8,S100A9,NOD1,AGO4,ATP8A1,FCER1A,FCER1G,FCGR1A,MGST1,FCGR2A,FCGR3A,BAIAP2,FGR,MMP8,CLEC10A,MMP9,ALDOC,SELL,AMPD3,ANPEP,FOS,FPR1,FPR2,NPC2,ENPP4,HVCN1,SLC2A3,CYFIP2,ARG1,KLRK1,TXNIP,RHOG,FRK,SLC11A1,LAT,CLEC4D,PYCARD,SLPI,DYNLL1,IRS2,FUCA2,IQGAP2,GPR84,NCF2,NCF4,CREG1,HPSE,CFB,CEACAM1,FGL2,NFATC2,BST1,NBEAL2,B…	Pik3ap1;Serpina3c;Atp8b4;Spred2;Ncf1;Pglyrp2;Sirpb1a;Adam8;Lrg1;Mefv;Plac8;Fabp5;Ccr2;S100a8;S100a9;Nod1;Ago4;Atp8a1;Fcer1a;Fcer1g;Fcgr1;Mgst1;Fcgr3;Fcgr4;Baiap2;Fgr;Mmp8;Clec10a;Mmp9;Aldoc;Sell;Ampd3;Anpep;Fos;Fpr1;Fpr2;Npc2;Enpp4;Hvcn1;Slc2a3;Cyfip2;Arg1;Klrk1;Txnip;Rhog;Frk;Slc11a1;Lat;Clec4d;Pycard;Slpi;Dynll1;Irs2;Fuca2;Iqgap2;Gpr84;Ncf2;Ncf4;Creg1;Hpse;Cfb;Ceacam1;Fgl2;Nfatc2;Bst1;Nbeal2;Bt…
1457780	Neutrophil degranulation	BioSystems: REACTOME	5.022e-22	1.268e-18	6.338e-19	5.331e-18	101	492	SERPINA3,ATP8B4,SIRPB1,ADAM8,LRG1,PLAC8,FABP5,S100A8,S100A9,ATP8A1,FCER1G,MGST1,FCGR2A,FGR,MMP8,MMP9,ALDOC,SELL,AMPD3,ANPEP,FPR1,FPR2,NPC2,ENPP4,HVCN1,SLC2A3,ARG1,RHOG,FRK,SLC11A1,CLEC4D,PYCARD,SLPI,DYNLL1,FUCA2,IQGAP2,GPR84,CREG1,HPSE,CEACAM1,FGL2,BST1,NBEAL2,GM2A,C3,C5AR1,GNS,LILRB3,PGLYRP1,COTL1,GSN,ORM1,CD14,CD36,TLR2,CD53,CD68,ADGRE5,TNFRSF1B,ARHGAP45,MCEMP1,HK3,CLEC5A,CD300A,CTSC,PECAM1,CFP…	Serpina3c;Atp8b4;Sirpb1a;Adam8;Lrg1;Plac8;Fabp5;S100a8;S100a9;Atp8a1;Fcer1g;Mgst1;Fcgr3;Fgr;Mmp8;Mmp9;Aldoc;Sell;Ampd3;Anpep;Fpr1;Fpr2;Npc2;Enpp4;Hvcn1;Slc2a3;Arg1;Rhog;Frk;Slc11a1;Clec4d;Pycard;Slpi;Dynll1;Fuca2;Iqgap2;Gpr84;Creg1;Hpse;Ceacam1;Fgl2;Bst1;Nbeal2;Gm2a;C3;C5ar1;Gns;Pirb;Pglyrp1;Cotl1;Gsn;Orm1;Cd14;Cd36;Tlr2;Cd53;Cd68;Adgre5;Tnfrsf1b;Arhgap45;Mcemp1;Hk3;Clec5a;Cd300a;Ctsc;Pecam1;Cfp;…
M5889	Ensemble of genes encoding extracellular matrix and extracellular matrix-associated proteins	MSigDB C2 BIOCARTA (v6.0)	1.01e-16	2.549e-13	6.372e-14	5.36e-13	149	1028	A2M,SERPINA3,MATN2,ADAM8,F7,LRG1,F10,F13A1,SVEP1,SEMA3A,S100A8,S100A9,FBLN2,EFEMP1,MGP,SPON1,CXCL9,C1QTNF1,CCL5,CCL8,CCL11,SRPX,MMP3,MMP8,CLEC10A,MMP9,MMP12,MMP13,MMP16,VEGFD,CXCL5,SDC2,CXCL12,SEMA4F,SEMA4D,SEMA3C,SFRP1,SFRP2,SFRP4,CILP,P3H3,ANXA6,MMP23B,CXCL13,CST7,FASLG,POSTN,CLEC4D,PDGFD,SLIT3,SLPI,CTSF,ADAM19,GAS6,HPSE,BDNF,BGN,FGL2,FNDC1,SULF1,ADAMTS15,SERPING1,C1QA,C1QB,C1QC,NID1,BMPER,SEMA…	A2m;Serpina3c;Matn2;Adam8;F7;Lrg1;F10;F13a1;Svep1;Sema3a;S100a8;S100a9;Fbln2;Efemp1;Mgp;Spon1;Cxcl9;C1qtnf1;Ccl5;Ccl8;Ccl11;Srpx;Mmp3;Mmp8;Clec10a;Mmp9;Mmp12;Mmp13;Mmp16;Vegfd;Cxcl5;Sdc2;Cxcl12;Sema4f;Sema4d;Sema3c;Sfrp1;Sfrp2;Sfrp4;Cilp;P3h3;Anxa6;Mmp23;Cxcl13;Cst7;Fasl;Postn;Clec4d;Pdgfd;Slit3;Slpi;Ctsf;Adam19;Gas6;Hpse;Bdnf;Bgn;Fgl2;Fndc1;Sulf1;Adamts15;Serping1;C1qa;C1qb;C1qc;Nid1;Bmper;Sema4…
1269201	Immunoregulatory interactions between a Lymphoid and a non-Lymphoid cell	BioSystems: REACTOME	9.938e-15	2.508e-11	4.181e-12	3.516e-11	40	136	SLAMF6,FCGR1A,FCGR2B,FCGR3A,SELL,IFITM1,CD200R1,KLRK1,SLAMF7,HCST,CD300C,C3,LILRB3,CD1D,CD3D,CD3E,CD3G,CD247,CD8A,CD8B,CD40,TREM2,CD300A,TYROBP,TREML4,CD300LF,ICAM1,ITGA4,ITGAL,ITGB2,ITGB7,CD300LB,KLRB1,KLRC1,KLRD1,LAIR1,CD300LD,SH2D1A,KLRG1,CD96	Slamf6;Fcgr1;Fcgr2b;Fcgr4;Sell;Ifitm1;Cd200r1;Klrk1;Slamf7;Hcst;Cd300c2;C3;Pirb;Cd1d1;Cd3d;Cd3e;Cd3g;Cd247;Cd8a;Cd8b1;Cd40;Trem2;Cd300a;Tyrobp;Treml4;Cd300lf;Icam1;Itga4;Itgal;Itgb2;Itgb7;Cd300lb;Klrb1b;Klrc1;Klrd1;Lair1;Cd300ld;Sh2d1a;Klrg1;Cd96
193147	Osteoclast differentiation	BioSystems: KEGG	3.108e-13	7.845e-10	1.121e-10	9.427e-10	37	130	ACP5,NCF1,SIRPB1,FCGR1A,FCGR2A,FCGR2B,FCGR3A,FOS,SPI1,NCF2,NCF4,STAT1,NFATC2,BTK,SYK,LILRB3,CAMK4,SOCS3,TGFB2,TREM2,TNF,TYK2,TYROBP,PIK3CD,PPARG,IFNG,PPP3CA,CSF1R,MAPK8,IL1A,IL1B,MAP2K6,CYBA,CYBB,SIRPA,LCK,LCP2	Acp5;Ncf1;Sirpb1a;Fcgr1;Fcgr3;Fcgr2b;Fcgr4;Fos;Spi1;Ncf2;Ncf4;Stat1;Nfatc2;Btk;Syk;Pirb;Camk4;Socs3;Tgfb2;Trem2;Tnf;Tyk2;Tyrobp;Pik3cd;Pparg;Ifng;Ppp3ca;Csf1r;Mapk8;Il1a;Il1b;Map2k6;Cyba;Cybb;Sirpa;Lck;Lcp2
83078	Hematopoietic cell lineage	BioSystems: KEGG	8.786e-13	2.218e-09	2.464e-10	2.073e-09	31	97	FCGR1A,ANPEP,CD1D,CD2,CD3D,CD3E,CD3G,CD5,CD8A,CD8B,CD14,CD36,CD37,CD38,TNF,HLA-DMA,HLA-DMB,HLA-DQA1,HLA-DQB1,HLA-DRB5,CSF1R,CSF2RA,CSF3R,IL1A,IL1B,IL3RA,IL4R,IL7R,CD55,ITGA4,ITGAM	Fcgr1;Anpep;Cd1d1;Cd2;Cd3d;Cd3e;Cd3g;Cd5;Cd8a;Cd8b1;Cd14;Cd36;Cd37;Cd38;Tnf;H2-DMa;H2-DMb2;H2-Aa;H2-Ab1;H2-Eb1;Csf1r;Csf2ra;Csf3r;Il1a;Il1b;Il3ra;Il4ra;Il7r;Cd55;Itga4;Itgam
1269310	Cytokine Signaling in Immune system	BioSystems: REACTOME	1.14e-12	2.876e-09	2.876e-10	2.419e-09	111	763	SPRED2,F13A1,CCR2,PTK2B,NOD1,FCGR1A,CIITA,CCL5,CCL11,EIF4E3,MMP3,MMP9,BATF,FOS,FPR1,IFITM1,FASLG,NDC1,LAT,IRS2,TNFRSF25,GBP2,GBP3,TNFRSF18,NDN,IL18R1,STAT1,NUP210,SYK,NOS2,TRIM2,CAMK2A,SOCS3,CASP3,CXCL2,HAVCR2,CD86,CD36,CD40,TNFRSF13C,IRAK3,TNF,IL1RL1,TNFRSF1B,HCK,EDA2R,HGF,CEBPD,PDGFRB,HLA-DQA1,HLA-DQB1,HLA-DRB5,HMOX1,TYK2,UBC,PIM1,PIK3CD,CCR1,CCR5,VAV1,COL1A2,VWF,MAP3K8,ICAM1,IRF8,SAMHD1,YES1,I…	Spred2;F13a1;Ccr2;Ptk2b;Nod1;Fcgr1;Ciita;Ccl5;Ccl11;Eif4e3;Mmp3;Mmp9;Batf;Fos;Fpr1;Ifitm1;Fasl;Ndc1;Lat;Irs2;Tnfrsf25;Gbp2;Gbp2b;Tnfrsf18;Ndn;Il18r1;Stat1;Nup210;Syk;Nos2;Trim2;Camk2a;Socs3;Casp3;Cxcl2;Havcr2;Cd86;Cd36;Cd40;Tnfrsf13c;Irak3;Tnf;Il1rl1;Tnfrsf1b;Hck;Eda2r;Hgf;Cebpd;Pdgfrb;H2-Aa;H2-Ab1;H2-Eb1;Hmox1;Tyk2;Ubc;Pim1;Pik3cd;Ccr1;Ccr5;Vav1;Col1a2;Vwf;Map3k8;Icam1;Irf8;Samhd1;Yes1;Ifng;Csf1…
M13247	T Cytotoxic Cell Surface Molecules	MSigDB C2 BIOCARTA (v6.0)	1.863e-12	4.703e-09	4.276e-10	3.596e-09	12	14	CD2,CD3D,CD3E,CD3G,CD247,CD8A,THY1,CD28,ICAM1,ITGAL,ITGB2,PTPRC	Cd2;Cd3d;Cd3e;Cd3g;Cd247;Cd8a;Thy1;Cd28;Icam1;Itgal;Itgb2;Ptprc
1269318	Signaling by Interleukins	BioSystems: REACTOME	4.191e-12	1.058e-08	8.815e-10	7.415e-09	85	531	SPRED2,F13A1,CCR2,PTK2B,NOD1,CCL5,CCL11,MMP3,MMP9,BATF,FOS,FPR1,FASLG,LAT,IRS2,NDN,IL18R1,STAT1,SYK,NOS2,CAMK2A,SOCS3,CASP3,CXCL2,HAVCR2,CD86,CD36,IRAK3,TNF,IL1RL1,TNFRSF1B,HCK,HGF,CEBPD,PDGFRB,HMOX1,TYK2,UBC,PIM1,PIK3CD,CCR1,CCR5,VAV1,COL1A2,VWF,MAP3K8,ICAM1,YES1,CSF1R,CSF2RA,RASAL3,CSF2RB,CSF3R,CTF1,IL1A,IL1B,IL1RN,IL2RB,MAP2K6,IL3RA,IL4R,IL7R,IL10,IL10RA,IL12RB1,IL16,IL18,INPP5D,IRAK2,PSMC6,IT…	Spred2;F13a1;Ccr2;Ptk2b;Nod1;Ccl5;Ccl11;Mmp3;Mmp9;Batf;Fos;Fpr1;Fasl;Lat;Irs2;Ndn;Il18r1;Stat1;Syk;Nos2;Camk2a;Socs3;Casp3;Cxcl2;Havcr2;Cd86;Cd36;Irak3;Tnf;Il1rl1;Tnfrsf1b;Hck;Hgf;Cebpd;Pdgfrb;Hmox1;Tyk2;Ubc;Pim1;Pik3cd;Ccr1;Ccr5;Vav1;Col1a2;Vwf;Map3k8;Icam1;Yes1;Csf1r;Csf2ra;Rasal3;Csf2rb;Csf3r;Ctf1;Il1a;Il1b;Il1rn;Il2rb;Map2k6;Il3ra;Il4ra;Il7r;Il10;Il10ra;Il12rb1;Il16;Il18;Inpp5d;Irak2;Psmc6;It…
1269171	Adaptive Immune System	BioSystems: REACTOME	8.124e-12	2.05e-08	1.577e-09	1.327e-08	115	826	PIK3AP1,NCF1,SLAMF6,AGO4,FCGR1A,FCGR2B,FCGR3A,SELL,MRC1,EVL,IFITM1,BTLA,CD200R1,KLRK1,LAT,CD274,DYNLL1,IRS2,SLAMF7,PDCD1LG2,RNF130,PAG1,CTSF,NCF2,NCF4,HCST,CD300C,BTK,SYK,AP1S2,C3,ELOC,LILRB3,SOCS3,CD1D,CD3D,CD3E,CD3G,CD247,CD8A,CD8B,CD14,CD28,CD86,CD36,TLR1,TLR2,TLR4,CD40,TREM2,CD74,HGF,PDCD1,HLA-DMA,HLA-DMB,CENPE,PDGFRB,HLA-DQA1,HLA-DQB1,CD300A,CTSC,HLA-DRB5,TYROBP,UBC,TREML4,ICOS,PIK3CD,VAV1,W…	Pik3ap1;Ncf1;Slamf6;Ago4;Fcgr1;Fcgr2b;Fcgr4;Sell;Mrc1;Evl;Ifitm1;Btla;Cd200r1;Klrk1;Lat;Cd274;Dynll1;Irs2;Slamf7;Pdcd1lg2;Rnf130;Pag1;Ctsf;Ncf2;Ncf4;Hcst;Cd300c2;Btk;Syk;Ap1s2;C3;Eloc;Pirb;Socs3;Cd1d1;Cd3d;Cd3e;Cd3g;Cd247;Cd8a;Cd8b1;Cd14;Cd28;Cd86;Cd36;Tlr1;Tlr2;Tlr4;Cd40;Trem2;Cd74;Hgf;Pdcd1;H2-DMa;H2-DMb2;Cenpe;Pdgfrb;H2-Aa;H2-Ab1;Cd300a;Ctsc;H2-Eb1;Tyrobp;Ubc;Treml4;Icos;Pik3cd;Vav1;Was;Cd300l…
83051	Cytokine-cytokine receptor interaction	BioSystems: KEGG	8.92e-12	2.252e-08	1.608e-09	1.353e-08	54	270	CCR2,CXCL9,CCL5,CCL8,CCL11,VEGFD,CXCL5,CXCL12,CXCL13,FASLG,CXCR6,TNFRSF25,TNFRSF18,IL18R1,TNFRSF21,PDGFC,CXCR3,CXCL16,CXCL2,CXCL3,TGFB2,CD40,TNFRSF13C,TNF,TNFRSF1B,EDA2R,HGF,PDGFRB,PF4,CCR1,CCR5,CXCL14,IFNG,CSF1R,CSF2RA,CSF2RB,CSF3R,IL21R,CTF1,IL1A,IL1B,IL2RB,IL3RA,IL4R,IL7R,IL10,IL10RA,IL12RB1,IL18,CXCR4,ACKR3,LIFR,EGFR,LTB	Ccr2;Cxcl9;Ccl5;Ccl8;Ccl11;Vegfd;Cxcl5;Cxcl12;Cxcl13;Fasl;Cxcr6;Tnfrsf25;Tnfrsf18;Il18r1;Tnfrsf21;Pdgfc;Cxcr3;Cxcl16;Cxcl2;Cxcl3;Tgfb2;Cd40;Tnfrsf13c;Tnf;Tnfrsf1b;Eda2r;Hgf;Pdgfrb;Pf4;Ccr1;Ccr5;Cxcl14;Ifng;Csf1r;Csf2ra;Csf2rb;Csf3r;Il21r;Ctf1;Il1a;Il1b;Il2rb;Il3ra;Il4ra;Il7r;Il10;Il10ra;Il12rb1;Il18;Cxcr4;Ackr3;Lifr;Egfr;Ltb
137922	IL12-mediated signaling events	BioSystems: Pathway Interaction Database	1.663e-11	4.198e-08	2.799e-09	2.354e-08	23	61	FOS,FASLG,IL18R1,STAT1,STAT4,NOS2,CD3D,CD3E,CD3G,CD247,CD8A,CD8B,TYK2,CCR5,TBX21,ATF2,IFNG,IL1B,IL2RB,MAP2K6,IL12RB1,IL18,LCK	Fos;Fasl;Il18r1;Stat1;Stat4;Nos2;Cd3d;Cd3e;Cd3g;Cd247;Cd8a;Cd8b1;Tyk2;Ccr5;Tbx21;Atf2;Ifng;Il1b;Il2rb;Map2k6;Il12rb1;Il18;Lck
138055	TCR signaling in naive CD8+ T cells	BioSystems: Pathway Interaction Database	4.078e-11	1.029e-07	6.054e-09	5.092e-08	20	48	LAT,PAG1,CD3D,CD3E,CD3G,CD247,CD8A,CD8B,CD28,CD86,VAV1,MAP3K8,ZAP70,PRKCB,PRKCQ,PTPN6,PTPRC,LCK,LCP2,RASGRP1	Lat;Pag1;Cd3d;Cd3e;Cd3g;Cd247;Cd8a;Cd8b1;Cd28;Cd86;Vav1;Map3k8;Zap70;Prkcb;Prkcq;Ptpn6;Ptprc;Lck;Lcp2;Rasgrp1
M4319	IL12 and Stat4 Dependent Signaling Pathway in Th1 Development	MSigDB C2 BIOCARTA (v6.0)	5.403e-11	1.364e-07	7.576e-09	6.372e-08	14	23	IL18R1,STAT4,CXCR3,CD3D,CD3E,CD3G,CD247,TYK2,CCR5,IFNG,MAPK8,MAP2K6,IL12RB1,IL18	Il18r1;Stat4;Cxcr3;Cd3d;Cd3e;Cd3g;Cd247;Tyk2;Ccr5;Ifng;Mapk8;Map2k6;Il12rb1;Il18
1470923	Interleukin-4 and 13 signaling	BioSystems: REACTOME	9.508e-11	2.4e-07	1.05e-08	8.834e-08	31	114	F13A1,CCL11,MMP3,MMP9,BATF,FOS,FASLG,NDN,STAT1,NOS2,SOCS3,CD36,TNF,TNFRSF1B,HGF,CEBPD,HMOX1,TYK2,PIM1,COL1A2,ICAM1,IL1A,IL1B,IL4R,IL10,IL18,ITGAM,ITGB2,PTGS2,LCN2,RORA	F13a1;Ccl11;Mmp3;Mmp9;Batf;Fos;Fasl;Ndn;Stat1;Nos2;Socs3;Cd36;Tnf;Tnfrsf1b;Hgf;Cebpd;Hmox1;Tyk2;Pim1;Col1a2;Icam1;Il1a;Il1b;Il4ra;Il10;Il18;Itgam;Itgb2;Ptgs2;Lcn2;Rora
M5467	Adhesion and Diapedesis of Granulocytes	MSigDB C2 BIOCARTA (v6.0)	9.571e-11	2.416e-07	1.05e-08	8.834e-08	11	14	SELL,SELP,SELPLG,TNF,PECAM1,ICAM1,IFNG,IL1A,ITGAL,ITGAM,ITGB2	Sell;Selp;Selplg;Tnf;Pecam1;Icam1;Ifng;Il1a;Itgal;Itgam;Itgb2
M6427	T Helper Cell Surface Molecules	MSigDB C2 BIOCARTA (v6.0)	9.571e-11	2.416e-07	1.05e-08	8.834e-08	11	14	CD2,CD3D,CD3E,CD3G,CD247,THY1,CD28,ICAM1,ITGAL,ITGB2,PTPRC	Cd2;Cd3d;Cd3e;Cd3g;Cd247;Thy1;Cd28;Icam1;Itgal;Itgb2;Ptprc
M6231	NO2-dependent IL 12 Pathway in NK cells	MSigDB C2 BIOCARTA (v6.0)	1.029e-10	2.597e-07	1.082e-08	9.103e-08	12	17	STAT4,NOS2,CXCR3,CD2,CD3D,CD3E,CD3G,CD247,TYK2,CCR5,IFNG,IL12RB1	Stat4;Nos2;Cxcr3;Cd2;Cd3d;Cd3e;Cd3g;Cd247;Tyk2;Ccr5;Ifng;Il12rb1
M5885	Ensemble of genes encoding ECM-associated proteins including ECM-affilaited proteins, ECM regulators and secreted factors	MSigDB C2 BIOCARTA (v6.0)	1.47e-10	3.711e-07	1.485e-08	1.249e-07	104	753	A2M,SERPINA3,ADAM8,F7,F10,F13A1,SEMA3A,S100A8,S100A9,CXCL9,C1QTNF1,CCL5,CCL8,CCL11,MMP3,MMP8,CLEC10A,MMP9,MMP12,MMP13,MMP16,VEGFD,CXCL5,SDC2,CXCL12,SEMA4F,SEMA4D,SEMA3C,SFRP1,SFRP2,SFRP4,P3H3,ANXA6,MMP23B,CXCL13,CST7,FASLG,CLEC4D,PDGFD,SLPI,CTSF,ADAM19,HPSE,BDNF,SULF1,ADAMTS15,SERPING1,C1QA,C1QB,C1QC,SEMA4A,PDGFC,ADAMTSL1,ADAMTS5,CXCL2,CXCL3,ITIH5,TGFB2,TGM2,PLXDC2,SERPINB2,CLEC3B,TNF,PCSK5,HGF,C…	A2m;Serpina3c;Adam8;F7;F10;F13a1;Sema3a;S100a8;S100a9;Cxcl9;C1qtnf1;Ccl5;Ccl8;Ccl11;Mmp3;Mmp8;Clec10a;Mmp9;Mmp12;Mmp13;Mmp16;Vegfd;Cxcl5;Sdc2;Cxcl12;Sema4f;Sema4d;Sema3c;Sfrp1;Sfrp2;Sfrp4;P3h3;Anxa6;Mmp23;Cxcl13;Cst7;Fasl;Clec4d;Pdgfd;Slpi;Ctsf;Adam19;Hpse;Bdnf;Sulf1;Adamts15;Serping1;C1qa;C1qb;C1qc;Sema4a;Pdgfc;Adamtsl1;Adamts5;Cxcl2;Cxcl3;Itih5;Tgfb2;Tgm2;Plxdc2;Serpinb2;Clec3b;Tnf;Pcsk5;Hgf;Cl…
83069	Cell adhesion molecules (CAMs)	BioSystems: KEGG	2.207e-10	5.57e-07	2.142e-08	1.802e-07	35	145	SDC2,SELL,SELP,SELPLG,MPZ,CD274,PDCD1LG2,SPN,CD2,CD6,CD8A,CD8B,CD28,CD86,CD40,PDCD1,HLA-DMA,HLA-DMB,HLA-DQA1,HLA-DQB1,HLA-DRB5,PECAM1,CADM1,ICOS,ICAM1,NECTIN3,VCAN,ITGA4,ITGAL,ITGAM,ITGB2,ITGB7,PTPRC,PTPRF,L1CAM	Sdc2;Sell;Selp;Selplg;Mpz;Cd274;Pdcd1lg2;Spn;Cd2;Cd6;Cd8a;Cd8b1;Cd28;Cd86;Cd40;Pdcd1;H2-DMa;H2-DMb2;H2-Aa;H2-Ab1;H2-Eb1;Pecam1;Cadm1;Icos;Icam1;Nectin3;Vcan;Itga4;Itgal;Itgam;Itgb2;Itgb7;Ptprc;Ptprf;L1cam
1269350	Platelet activation, signaling and aggregation	BioSystems: REACTOME	4.892e-10	1.235e-06	4.573e-08	3.846e-07	52	282	A2M,SERPINA3,ABHD6,F13A1,FCER1G,VEGFD,SELP,SELENOP,PDPN,RHOG,LAT,GAS6,SYK,SERPING1,GNAI1,GNGT2,TGFB2,ORM1,THBS1,CD36,CLEC3B,PIK3R5,HGF,PECAM1,GNG2,PF4,MGLL,PIK3CD,PIK3CG,PLEK,VAV1,VWF,IGF1,CSF2RA,CSF2RB,PIK3R6,SRGN,PRKCB,PRKCQ,IL2RB,IL3RA,CTSW,PHACTR2,PSAP,CFD,PTPN6,RAC2,FERMT3,RARRES2,LCK,LCP2,RASGRP1	A2m;Serpina3c;Abhd6;F13a1;Fcer1g;Vegfd;Selp;Selenop;Pdpn;Rhog;Lat;Gas6;Syk;Serping1;Gnai1;Gngt2;Tgfb2;Orm1;Thbs1;Cd36;Clec3b;Pik3r5;Hgf;Pecam1;Gng2;Pf4;Mgll;Pik3cd;Pik3cg;Plek;Vav1;Vwf;Igf1;Csf2ra;Csf2rb;Pik3r6;Srgn;Prkcb;Prkcq;Il2rb;Il3ra;Ctsw;Phactr2;Psap;Cfd;Ptpn6;Rac2;Fermt3;Rarres2;Lck;Lcp2;Rasgrp1
1458885	Th1 and Th2 cell differentiation	BioSystems: KEGG	1.252e-09	3.161e-06	1.129e-07	9.496e-07	26	92	FOS,LAT,STAT1,STAT4,NFATC2,CD3D,CD3E,CD3G,CD247,HLA-DMA,HLA-DMB,HLA-DQA1,HLA-DQB1,HLA-DRB5,TYK2,TBX21,ZAP70,IFNG,PPP3CA,PRKCQ,MAPK8,IL2RB,IL4R,IL12RB1,LCK,MAF	Fos;Lat;Stat1;Stat4;Nfatc2;Cd3d;Cd3e;Cd3g;Cd247;H2-DMa;H2-DMb2;H2-Aa;H2-Ab1;H2-Eb1;Tyk2;Tbx21;Zap70;Ifng;Ppp3ca;Prkcq;Mapk8;Il2rb;Il4ra;Il12rb1;Lck;Maf
83080	T cell receptor signaling pathway	BioSystems: KEGG	3.732e-09	9.421e-06	3.246e-07	2.73e-06	27	103	FOS,LAT,NFATC2,CD3D,CD3E,CD3G,CD247,CD8A,CD8B,CD28,TNF,PDCD1,ICOS,PIK3CD,VAV1,MAP3K8,ZAP70,IFNG,PPP3CA,PRKCQ,IL10,ITK,PTPN6,PTPRC,LCK,LCP2,RASGRP1	Fos;Lat;Nfatc2;Cd3d;Cd3e;Cd3g;Cd247;Cd8a;Cd8b1;Cd28;Tnf;Pdcd1;Icos;Pik3cd;Vav1;Map3k8;Zap70;Ifng;Ppp3ca;Prkcq;Il10;Itk;Ptpn6;Ptprc;Lck;Lcp2;Rasgrp1
1470924	Interleukin-10 signaling	BioSystems: REACTOME	4.405e-09	1.112e-05	3.586e-07	3.016e-06	18	49	CCR2,CCL5,FPR1,CXCL2,CD86,TNF,TNFRSF1B,TYK2,CCR1,CCR5,ICAM1,IL1A,IL1B,IL1RN,IL10,IL10RA,IL18,PTGS2	Ccr2;Ccl5;Fpr1;Cxcl2;Cd86;Tnf;Tnfrsf1b;Tyk2;Ccr1;Ccr5;Icam1;Il1a;Il1b;Il1rn;Il10;Il10ra;Il18;Ptgs2
83073	Complement and coagulation cascades	BioSystems: KEGG	5.996e-09	1.513e-05	4.729e-07	3.978e-06	23	79	A2M,F7,F10,F13A1,CFB,SERPING1,C1QA,C1QB,C1QC,C1R,C1S,C2,C3,C5AR1,C6,SERPINB2,CFH,VSIG4,VWF,CD55,ITGAM,ITGB2,CFD	A2m;F7;F10;F13a1;Cfb;Serping1;C1qa;C1qb;C1qc;C1ra;C1s1;C2;C3;C5ar1;C6;Serpinb2;Cfh;Vsig4;Vwf;Cd55;Itgam;Itgb2;Cfd
1469482	Th17 cell differentiation	BioSystems: KEGG	9.158e-09	2.311e-05	7.004e-07	5.891e-06	27	107	FOS,LAT,STAT1,NFATC2,CD3D,CD3E,CD3G,CD247,HLA-DMA,HLA-DMB,HLA-DQA1,HLA-DQB1,HLA-DRB5,TYK2,TBX21,ZAP70,IFNG,PPP3CA,IL21R,PRKCQ,MAPK8,IL1B,IL2RB,IL4R,IL12RB1,LCK,RORA	Fos;Lat;Stat1;Nfatc2;Cd3d;Cd3e;Cd3g;Cd247;H2-DMa;H2-DMb2;H2-Aa;H2-Ab1;H2-Eb1;Tyk2;Tbx21;Zap70;Ifng;Ppp3ca;Il21r;Prkcq;Mapk8;Il1b;Il2rb;Il4ra;Il12rb1;Lck;Rora
P00053	T cell activation	PantherDB	1.441e-08	3.638e-05	1.07e-06	9e-06	22	76	FOS,LAT,NFATC2,CD3D,CD3E,CD3G,CD247,CD28,CD86,CD74,HLA-DQA1,PIK3CD,PIK3CG,VAV1,WAS,ZAP70,PPP3CA,PRKCQ,MAPK8,PTPRC,LCK,LCP2	Fos;Lat;Nfatc2;Cd3d;Cd3e;Cd3g;Cd247;Cd28;Cd86;Cd74;H2-Aa;Pik3cd;Pik3cg;Vav1;Was;Zap70;Ppp3ca;Prkcq;Mapk8;Ptprc;Lck;Lcp2
83079	Natural killer cell mediated cytotoxicity	BioSystems: KEGG	2.312e-08	5.834e-05	1.667e-06	1.402e-05	30	133	PTK2B,FCER1G,FCGR3A,FASLG,KLRK1,LAT,HCST,NFATC2,SYK,CASP3,CD247,CD48,TNF,TYROBP,PIK3CD,VAV1,ICAM1,ZAP70,IFNG,PPP3CA,PRKCB,ITGAL,ITGB2,PTPN6,KLRC1,KLRD1,RAC2,LCK,LCP2,SH2D1A	Ptk2b;Fcer1g;Fcgr4;Fasl;Klrk1;Lat;Hcst;Nfatc2;Syk;Casp3;Cd247;Cd48;Tnf;Tyrobp;Pik3cd;Vav1;Icam1;Zap70;Ifng;Ppp3ca;Prkcb;Itgal;Itgb2;Ptpn6;Klrc1;Klrd1;Rac2;Lck;Lcp2;Sh2d1a
1269340	Hemostasis	BioSystems: REACTOME	2.435e-08	6.146e-05	1.707e-06	1.436e-05	86	640	A2M,SERPINA3,ABHD6,F7,F10,F13A1,EHD3,FCER1G,FGR,MERTK,VEGFD,SDC2,SELL,SELP,SELPLG,SELENOP,DOCK10,PDPN,RHOG,LAT,SPN,GAS6,CEACAM1,CD84,SYK,SERPING1,GNAI1,GNGT2,NOS2,DOK2,TGFB2,SLC7A8,ORM1,THBS1,CD2,CD36,SERPINB2,CD48,CD74,CLEC3B,PIK3R5,HGF,PDE3B,CENPE,PECAM1,GNG2,PF4,MGLL,SLC7A11,PIK3CD,PIK3CG,PLEK,VAV1,VWF,YES1,IGF1,CSF2RA,CSF2RB,PIK3R6,SRGN,PRKCB,PRKCQ,IL2RB,IL3RA,CTSW,PHACTR2,PSAP,INPP5D,SIRPA,I…	A2m;Serpina3c;Abhd6;F7;F10;F13a1;Ehd3;Fcer1g;Fgr;Mertk;Vegfd;Sdc2;Sell;Selp;Selplg;Selenop;Dock10;Pdpn;Rhog;Lat;Spn;Gas6;Ceacam1;Cd84;Syk;Serping1;Gnai1;Gngt2;Nos2;Dok2;Tgfb2;Slc7a8;Orm1;Thbs1;Cd2;Cd36;Serpinb2;Cd48;Cd74;Clec3b;Pik3r5;Hgf;Pde3b;Cenpe;Pecam1;Gng2;Pf4;Mgll;Slc7a11;Pik3cd;Pik3cg;Plek;Vav1;Vwf;Yes1;Igf1;Csf2ra;Csf2rb;Pik3r6;Srgn;Prkcb;Prkcq;Il2rb;Il3ra;Ctsw;Phactr2;Psap;Inpp5d;Sirpa;…
1269357	GPVI-mediated activation cascade	BioSystems: REACTOME	2.597e-08	6.555e-05	1.772e-06	1.49e-05	18	54	FCER1G,PDPN,RHOG,LAT,SYK,PIK3R5,PIK3CD,PIK3CG,VAV1,CSF2RA,CSF2RB,PIK3R6,IL2RB,IL3RA,PTPN6,RAC2,LCK,LCP2	Fcer1g;Pdpn;Rhog;Lat;Syk;Pik3r5;Pik3cd;Pik3cg;Vav1;Csf2ra;Csf2rb;Pik3r6;Il2rb;Il3ra;Ptpn6;Rac2;Lck;Lcp2
137998	TCR signaling in naive CD4+ T cells	BioSystems: Pathway Interaction Database	2.764e-08	6.978e-05	1.836e-06	1.544e-05	19	60	PAG1,CD3D,CD3E,CD3G,CD247,CD28,CD86,VAV1,WAS,MAP3K8,ZAP70,PRKCB,PRKCQ,ITK,PTPN6,PTPRC,LCK,LCP2,RASGRP1	Pag1;Cd3d;Cd3e;Cd3g;Cd247;Cd28;Cd86;Vav1;Was;Map3k8;Zap70;Prkcb;Prkcq;Itk;Ptpn6;Ptprc;Lck;Lcp2;Rasgrp1
138018	Downstream signaling in naive CD8+ T cells	BioSystems: Pathway Interaction Database	4.536e-08	0.0001145	2.935e-06	2.469e-05	17	50	FOS,FASLG,TNFRSF18,STAT4,NFATC2,CD3D,CD3E,CD3G,CD247,CD8A,CD8B,TNF,IFNG,PRKCB,PRKCQ,MAPK8,IL2RB	Fos;Fasl;Tnfrsf18;Stat4;Nfatc2;Cd3d;Cd3e;Cd3g;Cd247;Cd8a;Cd8b1;Tnf;Ifng;Prkcb;Prkcq;Mapk8;Il2rb
1269173	Phosphorylation of CD3 and TCR zeta chains	BioSystems: REACTOME	4.971e-08	0.0001255	3.137e-06	2.638e-05	12	25	PAG1,CD3D,CD3E,CD3G,CD247,HLA-DQA1,HLA-DQB1,HLA-DRB5,PTPN22,PTPRC,PTPRJ,LCK	Pag1;Cd3d;Cd3e;Cd3g;Cd247;H2-Aa;H2-Ab1;H2-Eb1;Ptpn22;Ptprc;Ptprj;Lck
M3952	Cells and Molecules involved in local acute inflammatory response	MSigDB C2 BIOCARTA (v6.0)	5.35e-08	0.000135	3.294e-06	2.77e-05	10	17	SELP,SELPLG,C3,C6,TNF,ICAM1,IL1A,ITGA4,ITGAL,ITGB2	Selp;Selplg;C3;C6;Tnf;Icam1;Il1a;Itga4;Itgal;Itgb2
1269182	PD-1 signaling	BioSystems: REACTOME	8.615e-08	0.0002175	5.177e-06	4.355e-05	12	26	CD274,PDCD1LG2,CD3D,CD3E,CD3G,CD247,PDCD1,HLA-DQA1,HLA-DQB1,HLA-DRB5,PTPN6,LCK	Cd274;Pdcd1lg2;Cd3d;Cd3e;Cd3g;Cd247;Pdcd1;H2-Aa;H2-Ab1;H2-Eb1;Ptpn6;Lck
1269175	Generation of second messenger molecules	BioSystems: REACTOME	1.013e-07	0.0002557	5.945e-06	5.001e-05	14	36	EVL,LAT,CD3D,CD3E,CD3G,CD247,HLA-DQA1,HLA-DQB1,HLA-DRB5,WAS,ZAP70,ITK,LCK,LCP2	Evl;Lat;Cd3d;Cd3e;Cd3g;Cd247;H2-Aa;H2-Ab1;H2-Eb1;Was;Zap70;Itk;Lck;Lcp2
M4956	Monocyte and its Surface Molecules	MSigDB C2 BIOCARTA (v6.0)	1.126e-07	0.0002843	6.461e-06	5.434e-05	8	11	SELL,SELP,PECAM1,ICAM1,ITGA4,ITGAL,ITGAM,ITGB2	Sell;Selp;Pecam1;Icam1;Itga4;Itgal;Itgam;Itgb2
99051	Chemokine signaling pathway	BioSystems: KEGG	1.184e-07	0.0002989	6.642e-06	5.587e-05	35	182	NCF1,CCR2,PTK2B,GRK3,CXCL9,CCL5,CCL8,CCL11,FGR,CXCL5,PREX1,CXCL12,CXCL13,CXCR6,STAT1,GNAI1,GNGT2,CXCR3,CXCL16,CXCL2,CXCL3,HCK,GNG2,PF4,PIK3CD,CCR1,CCR5,VAV1,WAS,PRKCB,ELMO1,ITK,CXCR4,RAC2,DOCK2	Ncf1;Ccr2;Ptk2b;Grk3;Cxcl9;Ccl5;Ccl8;Ccl11;Fgr;Cxcl5;Prex1;Cxcl12;Cxcl13;Cxcr6;Stat1;Gnai1;Gngt2;Cxcr3;Cxcl16;Cxcl2;Cxcl3;Hck;Gng2;Pf4;Pik3cd;Ccr1;Ccr5;Vav1;Was;Prkcb;Elmo1;Itk;Cxcr4;Rac2;Dock2
1269547	Chemokine receptors bind chemokines	BioSystems: REACTOME	1.55e-07	0.0003912	8.504e-06	7.153e-05	16	48	CCR2,CXCL9,CCL5,CXCL5,CXCL12,CXCL13,CXCR6,CXCR3,CXCL16,CXCL2,CXCL3,PF4,CCR1,CCR5,CXCR4,ACKR3	Ccr2;Cxcl9;Ccl5;Cxcl5;Cxcl12;Cxcl13;Cxcr6;Cxcr3;Cxcl16;Cxcl2;Cxcl3;Pf4;Ccr1;Ccr5;Cxcr4;Ackr3
153910	Phagosome	BioSystems: KEGG	2.156e-07	0.0005442	1.158e-05	9.739e-05	31	154	NCF1,FCGR1A,FCGR2A,FCGR2B,FCGR3A,MRC1,MSR1,RAB7B,MARCO,NCF2,NCF4,C1R,C3,CORO1A,THBS1,CD14,CD36,SCARB1,TLR2,TLR4,HLA-DMA,HLA-DMB,HLA-DQA1,HLA-DQB1,HLA-DRB5,CLEC7A,CTSS,CYBA,CYBB,ITGAM,ITGB2	Ncf1;Fcgr1;Fcgr3;Fcgr2b;Fcgr4;Mrc1;Msr1;Rab7b;Marco;Ncf2;Ncf4;C1ra;C3;Coro1a;Thbs1;Cd14;Cd36;Scarb1;Tlr2;Tlr4;H2-DMa;H2-DMb2;H2-Aa;H2-Ab1;H2-Eb1;Clec7a;Ctss;Cyba;Cybb;Itgam;Itgb2
M917	Complement Pathway	MSigDB C2 BIOCARTA (v6.0)	2.217e-07	0.0005597	1.166e-05	9.807e-05	10	19	CFB,C1QA,C1QB,C1QC,C1R,C1S,C2,C3,C6,CFD	Cfb;C1qa;C1qb;C1qc;C1ra;C1s1;C2;C3;C6;Cfd
137936	IL12 signaling mediated by STAT4	BioSystems: Pathway Interaction Database	2.364e-07	0.0005966	1.209e-05	0.0001017	12	28	FOS,IL18R1,STAT4,CD3D,CD3E,CD3G,CD247,CD28,TBX21,IFNG,MAPK8,IL18	Fos;Il18r1;Stat4;Cd3d;Cd3e;Cd3g;Cd247;Cd28;Tbx21;Ifng;Mapk8;Il18
M3468	Genes encoding enzymes and their regulators involved in the remodeling of the extracellular matrix	MSigDB C2 BIOCARTA (v6.0)	2.394e-07	0.0006043	1.209e-05	0.0001017	41	238	A2M,SERPINA3,ADAM8,F7,F10,F13A1,MMP3,MMP8,MMP9,MMP12,MMP13,MMP16,P3H3,MMP23B,CST7,SLPI,CTSF,ADAM19,HPSE,SULF1,ADAMTS15,SERPING1,ADAMTSL1,ADAMTS5,ITIH5,TGM2,SERPINB2,PCSK5,CTSC,ADAMTS2,CTSB,FAM20A,CTSE,CTSH,CTSS,CTSW,FAM20C,HTRA3,LOX,LOXL1,SERPINB1	A2m;Serpina3c;Adam8;F7;F10;F13a1;Mmp3;Mmp8;Mmp9;Mmp12;Mmp13;Mmp16;P3h3;Mmp23;Cst7;Slpi;Ctsf;Adam19;Hpse;Sulf1;Adamts15;Serping1;Adamtsl1;Adamts5;Itih5;Tgm2;Serpinb2;Pcsk5;Ctsc;Adamts2;Ctsb;Fam20a;Ctse;Ctsh;Ctss;Ctsw;Fam20c;Htra3;Lox;Loxl1;Serpinb1a
M5884	Ensemble of genes encoding core extracellular matrix including ECM glycoproteins, collagens and proteoglycans	MSigDB C2 BIOCARTA (v6.0)	2.894e-07	0.0007305	1.432e-05	0.0001205	45	275	MATN2,LRG1,SVEP1,FBLN2,EFEMP1,MGP,SPON1,SRPX,CILP,POSTN,SLIT3,GAS6,BGN,FGL2,FNDC1,NID1,BMPER,EMILIN1,TGFBI,THBS1,TNXB,ADIPOQ,COL14A1,COL1A2,COL4A5,COL5A2,COL6A2,COL9A1,COL11A1,COL12A1,VWF,ABI3BP,COL27A1,SNED1,IGFBP5,PRELP,SRGN,VCAN,CTGF,CRISPLD2,DPT,MFAP5,LGI2,LTBP2,LUM	Matn2;Lrg1;Svep1;Fbln2;Efemp1;Mgp;Spon1;Srpx;Cilp;Postn;Slit3;Gas6;Bgn;Fgl2;Fndc1;Nid1;Bmper;Emilin1;Tgfbi;Thbs1;Tnxb;Adipoq;Col14a1;Col1a2;Col4a5;Col5a2;Col6a2;Col9a1;Col11a1;Col12a1;Vwf;Abi3bp;Col27a1;Sned1;Igfbp5;Prelp;Srgn;Vcan;Ctgf;Crispld2;Dpt;Mfap5;Lgi2;Ltbp2;Lum
SMP00023	Steroid Biosynthesis	SMPDB	7.388e-07	0.001865	3.453e-05	0.0002904	10	21	MSMO1,FDFT1,FDPS,MVD,SQLE,HMGCS1,IDI1,CYP51A1,DHCR24,LSS	Msmo1;Fdft1;Fdps;Mvd;Sqle;Hmgcs1;Idi1;Cyp51;Dhcr24;Lss
1269177	Costimulation by the CD28 family	BioSystems: REACTOME	8.604e-07	0.002172	3.948e-05	0.0003321	19	73	BTLA,CD274,PDCD1LG2,CD3D,CD3E,CD3G,CD247,CD28,CD86,PDCD1,HLA-DQA1,HLA-DQB1,HLA-DRB5,ICOS,VAV1,MAP3K8,YES1,PTPN6,LCK	Btla;Cd274;Pdcd1lg2;Cd3d;Cd3e;Cd3g;Cd247;Cd28;Cd86;Pdcd1;H2-Aa;H2-Ab1;H2-Eb1;Icos;Vav1;Map3k8;Yes1;Ptpn6;Lck
137945	amb2 Integrin signaling	BioSystems: Pathway Interaction Database	9.75e-07	0.002461	4.317e-05	0.0003631	15	48	FGR,MMP9,SELP,SELPLG,THY1,TNF,HCK,HP,ICAM1,YES1,CTGF,ITGAM,ITGB2,LCK,LRP1	Fgr;Mmp9;Selp;Selplg;Thy1;Tnf;Hck;Hp;Icam1;Yes1;Ctgf;Itgam;Itgb2;Lck;Lrp1
137993	Calcineurin-regulated NFAT-dependent transcription in lymphocytes	BioSystems: Pathway Interaction Database	9.75e-07	0.002461	4.317e-05	0.0003631	15	48	IKZF1,BATF3,FOS,FASLG,GBP3,NFATC2,CASP3,TNF,TBX21,PPARG,IFNG,PRKCQ,PTGS2,RNF128,MAF	Ikzf1;Batf3;Fos;Fasl;Gbp2b;Nfatc2;Casp3;Tnf;Tbx21;Pparg;Ifng;Prkcq;Ptgs2;Rnf128;Maf
83125	Primary immunodeficiency	BioSystems: KEGG	1.148e-06	0.002898	4.878e-05	0.0004103	13	37	CIITA,BTK,CD3D,CD3E,CD8A,CD8B,CD40,TNFRSF13C,ICOS,ZAP70,IL7R,PTPRC,LCK	Ciita;Btk;Cd3d;Cd3e;Cd8a;Cd8b1;Cd40;Tnfrsf13c;Icos;Zap70;Il7r;Ptprc;Lck
138000	IL23-mediated signaling events	BioSystems: Pathway Interaction Database	1.148e-06	0.002898	4.878e-05	0.0004103	13	37	CXCL9,IL18R1,STAT1,STAT4,NOS2,SOCS3,CD3E,TNF,TYK2,IFNG,IL1B,IL12RB1,IL18	Cxcl9;Il18r1;Stat1;Stat4;Nos2;Socs3;Cd3e;Tnf;Tyk2;Ifng;Il1b;Il12rb1;Il18
1270001	Metabolism of lipids and lipoproteins	BioSystems: REACTOME	1.166e-06	0.002943	4.878e-05	0.0004103	97	816	A2M,EPHX2,PLBD1,ABCA1,HACD4,CYP39A1,FABP4,FABP5,PLIN2,FABP7,ACSL1,ACSL3,MSMO1,PLA1A,FDFT1,FDPS,ALOX5AP,FAM213B,CYP4F2,NPC2,APOC1,APOC2,APOE,HSD3B7,STS,PTGR1,SLCO1A2,CIDEC,MVD,B3GALNT1,ABCC3,SQLE,APOBR,TNFRSF21,MBOAT2,BDH1,GGT1,RGL1,DGAT2,GM2A,GPD1,TBXAS1,CD36,SCARB1,PIK3R5,VAPB,PCSK5,CDS1,MGLL,HMGCS1,PLD3,PCTP,PPT2,LIPG,PIK3CD,PIK3CG,HPGD,FADS2,CYP7B1,PLD1,ELOVL6,PLTP,PRKD2,VLDLR,STARD4,G0S2,PTGE…	A2m;Ephx2;Plbd1;Abca1;Hacd4;Cyp39a1;Fabp4;Fabp5;Plin2;Fabp7;Acsl1;Acsl3;Msmo1;Pla1a;Fdft1;Fdps;Alox5ap;Fam213b;Cyp4f18;Npc2;Apoc1;Apoc2;Apoe;Hsd3b7;Sts;Ptgr1;Slco1a5;Cidec;Mvd;B3galnt1;Abcc3;Sqle;Apobr;Tnfrsf21;Mboat2;Bdh1;Ggt1;Rgl1;Dgat2;Gm2a;Gpd1;Tbxas1;Cd36;Scarb1;Pik3r5;Vapb;Pcsk5;Cds1;Mgll;Hmgcs1;Pld3;Pctp;Ppt2;Lipg;Pik3cd;Pik3cg;Hpgd;Fads2;Cyp7b1;Pld1;Elovl6;Pltp;Prkd2;Vldlr;Stard4;G0s2;Ptg…
1270244	Extracellular matrix organization	BioSystems: REACTOME	1.179e-06	0.002976	4.878e-05	0.0004103	46	298	A2M,ADAM8,FBLN2,EFEMP1,MMP3,MMP8,MMP9,MMP12,MMP13,MMP16,SDC2,P3H3,BGN,CEACAM1,NID1,CASP3,ADAMTS5,TGFB2,THBS1,TNXB,PECAM1,CMA1,COL14A1,COL1A2,COL4A5,COL5A2,COL6A2,COL9A1,COL11A1,COL12A1,ADAMTS2,COL27A1,ICAM1,VCAN,CTSB,CTSS,ITGA4,ITGAL,ITGAM,ITGB2,ITGB7,MFAP5,LOX,LOXL1,LTBP2,LUM	A2m;Adam8;Fbln2;Efemp1;Mmp3;Mmp8;Mmp9;Mmp12;Mmp13;Mmp16;Sdc2;P3h3;Bgn;Ceacam1;Nid1;Casp3;Adamts5;Tgfb2;Thbs1;Tnxb;Pecam1;Cma1;Col14a1;Col1a2;Col4a5;Col5a2;Col6a2;Col9a1;Col11a1;Col12a1;Adamts2;Col27a1;Icam1;Vcan;Ctsb;Ctss;Itga4;Itgal;Itgam;Itgb2;Itgb7;Mfap5;Lox;Loxl1;Ltbp2;Lum
1269174	Translocation of ZAP-70 to Immunological synapse	BioSystems: REACTOME	1.265e-06	0.003194	5.151e-05	0.0004332	10	22	CD3D,CD3E,CD3G,CD247,HLA-DQA1,HLA-DQB1,HLA-DRB5,ZAP70,PTPN22,LCK	Cd3d;Cd3e;Cd3g;Cd247;H2-Aa;H2-Ab1;H2-Eb1;Zap70;Ptpn22;Lck
128760	Intestinal immune network for IgA production	BioSystems: KEGG	1.31e-06	0.003308	5.25e-05	0.0004416	15	49	CXCL12,CD28,CD86,CD40,TNFRSF13C,HLA-DMA,HLA-DMB,HLA-DQA1,HLA-DQB1,HLA-DRB5,ICOS,IL10,ITGA4,ITGB7,CXCR4	Cxcl12;Cd28;Cd86;Cd40;Tnfrsf13c;H2-DMa;H2-DMb2;H2-Aa;H2-Ab1;H2-Eb1;Icos;Il10;Itga4;Itgb7;Cxcr4
1269373	Cell surface interactions at the vascular wall	BioSystems: REACTOME	1.482e-06	0.00374	5.844e-05	0.0004915	28	143	FCER1G,MERTK,SDC2,SELL,SELP,SELPLG,SPN,GAS6,CEACAM1,CD84,DOK2,SLC7A8,CD2,CD48,CD74,PECAM1,PF4,SLC7A11,YES1,INPP5D,SIRPA,ITGA4,ITGAL,ITGAM,ITGB2,PTPN6,L1CAM,LCK	Fcer1g;Mertk;Sdc2;Sell;Selp;Selplg;Spn;Gas6;Ceacam1;Cd84;Dok2;Slc7a8;Cd2;Cd48;Cd74;Pecam1;Pf4;Slc7a11;Yes1;Inpp5d;Sirpa;Itga4;Itgal;Itgam;Itgb2;Ptpn6;L1cam;Lck
PW:0000454	cholesterol biosynthetic	Pathway Ontology	1.61e-06	0.004065	6.253e-05	0.000526	9	18	FDFT1,FDPS,MVD,SQLE,HMGCS1,IDI1,CYP51A1,DHCR24,LSS	Fdft1;Fdps;Mvd;Sqle;Hmgcs1;Idi1;Cyp51;Dhcr24;Lss
137910	CXCR4-mediated signaling events	BioSystems: Pathway Interaction Database	1.674e-06	0.004224	6.319e-05	0.0005315	19	76	PTK2B,FGR,MMP9,CXCL12,PAG1,STAT1,CD3D,CD3E,CD3G,CD247,HCK,GNG2,VAV1,YES1,PTPN6,PTPRC,CXCR4,LCK,RGS1	Ptk2b;Fgr;Mmp9;Cxcl12;Pag1;Stat1;Cd3d;Cd3e;Cd3g;Cd247;Hck;Gng2;Vav1;Yes1;Ptpn6;Ptprc;Cxcr4;Lck;Rgs1
M7146	Classical Complement Pathway	MSigDB C2 BIOCARTA (v6.0)	1.677e-06	0.004234	6.319e-05	0.0005315	8	14	C1QA,C1QB,C1QC,C1R,C1S,C2,C3,C6	C1qa;C1qb;C1qc;C1ra;C1s1;C2;C3;C6
1269204	Toll-Like Receptors Cascades	BioSystems: REACTOME	1.935e-06	0.004885	7.184e-05	0.0006042	29	153	S100A8,S100A9,NOD1,FOS,BTK,RIPK3,CD14,CD36,TLR1,TLR2,TLR4,IRAK3,UBC,LY86,MAP3K8,ATF2,IKBKE,MAPK8,CTSB,MAP2K6,CTSS,LGMN,IRAK2,ITGAM,ITGB2,MAPKAPK3,UNC93B1,DUSP4,CD180	S100a8;S100a9;Nod1;Fos;Btk;Ripk3;Cd14;Cd36;Tlr1;Tlr2;Tlr4;Irak3;Ubc;Ly86;Map3k8;Atf2;Ikbke;Mapk8;Ctsb;Map2k6;Ctss;Lgmn;Irak2;Itgam;Itgb2;Mapkapk3;Unc93b1;Dusp4;Cd180
1269365	Response to elevated platelet cytosolic Ca2+	BioSystems: REACTOME	1.994e-06	0.005032	7.292e-05	0.0006134	27	137	A2M,SERPINA3,F13A1,VEGFD,SELP,SELENOP,GAS6,SERPING1,TGFB2,ORM1,THBS1,CD36,CLEC3B,HGF,PECAM1,PF4,PLEK,VWF,IGF1,SRGN,PRKCB,CTSW,PHACTR2,PSAP,CFD,FERMT3,RARRES2	A2m;Serpina3c;F13a1;Vegfd;Selp;Selenop;Gas6;Serping1;Tgfb2;Orm1;Thbs1;Cd36;Clec3b;Hgf;Pecam1;Pf4;Plek;Vwf;Igf1;Srgn;Prkcb;Ctsw;Phactr2;Psap;Cfd;Fermt3;Rarres2
83083	Leukocyte transendothelial migration	BioSystems: KEGG	2.174e-06	0.005488	7.84e-05	0.0006594	24	114	NCF1,PTK2B,MMP9,CXCL12,ARHGAP5,RHOH,NCF2,NCF4,GNAI1,THY1,PECAM1,PIK3CD,VAV1,ICAM1,PRKCB,CYBA,CYBB,ITGA4,ITGAL,ITGAM,ITGB2,ITK,CXCR4,RAC2	Ncf1;Ptk2b;Mmp9;Cxcl12;Arhgap5;Rhoh;Ncf2;Ncf4;Gnai1;Thy1;Pecam1;Pik3cd;Vav1;Icam1;Prkcb;Cyba;Cybb;Itga4;Itgal;Itgam;Itgb2;Itk;Cxcr4;Rac2
M1469	Adhesion and Diapedesis of Lymphocytes	MSigDB C2 BIOCARTA (v6.0)	2.896e-06	0.007309	0.0001015	0.0008539	7	11	SELL,PECAM1,ICAM1,IL1A,ITGA4,ITGAL,ITGB2	Sell;Pecam1;Icam1;Il1a;Itga4;Itgal;Itgb2
1269367	Platelet degranulation	BioSystems: REACTOME	3.107e-06	0.007841	0.0001074	0.0009034	26	132	A2M,SERPINA3,F13A1,VEGFD,SELP,SELENOP,GAS6,SERPING1,TGFB2,ORM1,THBS1,CD36,CLEC3B,HGF,PECAM1,PF4,PLEK,VWF,IGF1,SRGN,CTSW,PHACTR2,PSAP,CFD,FERMT3,RARRES2	A2m;Serpina3c;F13a1;Vegfd;Selp;Selenop;Gas6;Serping1;Tgfb2;Orm1;Thbs1;Cd36;Clec3b;Hgf;Pecam1;Pf4;Plek;Vwf;Igf1;Srgn;Ctsw;Phactr2;Psap;Cfd;Fermt3;Rarres2
M4047	Selective expression of chemokine receptors during T-cell polarization	MSigDB C2 BIOCARTA (v6.0)	3.246e-06	0.008193	0.0001102	0.000927	11	29	CCR2,IL18R1,CXCR3,TGFB2,CD28,CCR1,CCR5,IFNG,IL4R,IL12RB1,CXCR4	Ccr2;Il18r1;Cxcr3;Tgfb2;Cd28;Ccr1;Ccr5;Ifng;Il4ra;Il12rb1;Cxcr4
P00031	Inflammation mediated by chemokine and cytokine signaling pathway	PantherDB	3.325e-06	0.008392	0.0001102	0.000927	33	191	ACTA2,CCR2,PTK2B,CCL5,CCL8,CCL11,PREX1,ALOX5AP,FPR1,RHOG,CXCR6,MYH10,NFATC2,C5AR1,CXCR3,CAMK2A,GNG2,PF4,PIK3CD,PIK3CG,COL14A1,CCR1,CCR5,VAV1,COL6A2,COL12A1,VWF,IFNG,PRKCB,ITGAL,ITGB7,CXCR4,RAC2	Acta2;Ccr2;Ptk2b;Ccl5;Ccl8;Ccl11;Prex1;Alox5ap;Fpr1;Rhog;Cxcr6;Myh10;Nfatc2;C5ar1;Cxcr3;Camk2a;Gng2;Pf4;Pik3cd;Pik3cg;Col14a1;Ccr1;Ccr5;Vav1;Col6a2;Col12a1;Vwf;Ifng;Prkcb;Itgal;Itgb7;Cxcr4;Rac2
1270037	Cholesterol biosynthesis	BioSystems: REACTOME	3.349e-06	0.008454	0.0001102	0.000927	10	24	MSMO1,FDFT1,FDPS,MVD,SQLE,HMGCS1,IDI1,CYP51A1,DHCR24,LSS	Msmo1;Fdft1;Fdps;Mvd;Sqle;Hmgcs1;Idi1;Cyp51;Dhcr24;Lss
M1462	CTL mediated immune response against target cells	MSigDB C2 BIOCARTA (v6.0)	3.362e-06	0.008487	0.0001102	0.000927	8	15	FASLG,CD3D,CD3E,CD3G,CD247,ICAM1,ITGAL,ITGB2	Fasl;Cd3d;Cd3e;Cd3g;Cd247;Icam1;Itgal;Itgb2
138050	Fc-epsilon receptor I signaling in mast cells	BioSystems: Pathway Interaction Database	3.493e-06	0.008816	0.000113	0.0009507	16	59	FCER1A,FCER1G,FCGR2B,FOS,LAT,NFATC2,BTK,SYK,HCLS1,VAV1,LAT2,PRKCB,MAPK8,ITK,DUSP1,LCP2	Fcer1a;Fcer1g;Fcgr2b;Fos;Lat;Nfatc2;Btk;Syk;Hcls1;Vav1;Lat2;Prkcb;Mapk8;Itk;Dusp1;Lcp2
1269196	Cross-presentation of particulate exogenous antigens (phagosomes)	BioSystems: REACTOME	3.844e-06	0.009701	0.0001213	0.00102	6	8	NCF1,NCF2,NCF4,CD36,CYBA,CYBB	Ncf1;Ncf2;Ncf4;Cd36;Cyba;Cybb
M19784	T Cell Receptor Signaling Pathway	MSigDB C2 BIOCARTA (v6.0)	4.242e-06	0.01071	0.0001322	0.001112	14	47	FOS,LAT,NFATC2,CD3D,CD3E,CD3G,CD247,PIK3CG,VAV1,ZAP70,PPP3CA,PRKCB,MAPK8,LCK	Fos;Lat;Nfatc2;Cd3d;Cd3e;Cd3g;Cd247;Pik3cg;Vav1;Zap70;Ppp3ca;Prkcb;Mapk8;Lck
142269	superpathway of cholesterol biosynthesis	BioSystems: BIOCYC	5.216e-06	0.01316	0.0001586	0.001334	10	25	MSMO1,FDFT1,FDPS,MVD,SQLE,HMGCS1,IDI1,CYP51A1,DHCR24,LSS	Msmo1;Fdft1;Fdps;Mvd;Sqle;Hmgcs1;Idi1;Cyp51;Dhcr24;Lss
137929	IL27-mediated signaling events	BioSystems: Pathway Interaction Database	7.919e-06	0.01999	0.0002307	0.001941	10	26	STAT1,STAT4,TNF,TYK2,TBX21,IFNG,IL1B,IL12RB1,IL18,EBI3	Stat1;Stat4;Tnf;Tyk2;Tbx21;Ifng;Il1b;Il12rb1;Il18;Ebi3
M1467	The Co-Stimulatory Signal During T-cell Activation	MSigDB C2 BIOCARTA (v6.0)	7.954e-06	0.02007	0.0002307	0.001941	9	21	CD3D,CD3E,CD3G,CD247,CD28,CD86,ICOS,ITK,LCK	Cd3d;Cd3e;Cd3g;Cd247;Cd28;Cd86;Icos;Itk;Lck
812256	TNF signaling pathway	BioSystems: KEGG	1.002e-05	0.02529	0.0002873	0.002417	22	108	CCL5,MMP3,MMP9,CXCL5,FOS,IL18R1,RIPK3,SOCS3,CASP3,CXCL2,CXCL3,TNF,TNFRSF1B,CEBPB,PIK3CD,MAP3K8,ICAM1,ATF2,MAPK8,IL1B,MAP2K6,PTGS2	Ccl5;Mmp3;Mmp9;Cxcl5;Fos;Il18r1;Ripk3;Socs3;Casp3;Cxcl2;Cxcl3;Tnf;Tnfrsf1b;Cebpb;Pik3cd;Map3k8;Icam1;Atf2;Mapk8;Il1b;Map2k6;Ptgs2
PW:0000248	steroid biosynthetic	Pathway Ontology	1.081e-05	0.02728	0.0003032	0.00255	6	9	FDFT1,FDPS,MVD,SQLE,IDI1,LSS	Fdft1;Fdps;Mvd;Sqle;Idi1;Lss
1269280	FCGR activation	BioSystems: REACTOME	1.258e-05	0.03176	0.000349	0.002936	9	22	FCGR1A,FCGR2A,FCGR3A,FGR,SYK,CD3G,CD247,HCK,YES1	Fcgr1;Fcgr3;Fcgr4;Fgr;Syk;Cd3g;Cd247;Hck;Yes1
M10765	Lck and Fyn tyrosine kinases in initiation of TCR Activation	MSigDB C2 BIOCARTA (v6.0)	1.32e-05	0.03333	0.0003622	0.003047	7	13	CD3D,CD3E,CD3G,CD247,ZAP70,PTPRC,LCK	Cd3d;Cd3e;Cd3g;Cd247;Zap70;Ptprc;Lck
138060	Thromboxane A2 receptor signaling	BioSystems: Pathway Interaction Database	1.354e-05	0.03416	0.0003674	0.00309	13	45	GRK3,FGR,SYK,TGM2,HCK,GNG2,SLC9A3R1,ICAM1,YES1,PRKCQ,PTGIR,LCK,EGFR	Grk3;Fgr;Syk;Tgm2;Hck;Gng2;Slc9a3r1;Icam1;Yes1;Prkcq;Ptgir;Lck;Egfr
MAP00100_Sterol_biosynthesis	MAP00100 Sterol biosynthesis	GenMAPP	2.534e-05	0.06395	0.0006803	0.005722	6	10	FDFT1,FDPS,MVD,SQLE,IDI1,LSS	Fdft1;Fdps;Mvd;Sqle;Idi1;Lss
M6705	Th1/Th2 Differentiation	MSigDB C2 BIOCARTA (v6.0)	3.026e-05	0.07637	0.0008039	0.006762	8	19	IL18R1,CD28,CD86,CD40,IFNG,IL4R,IL12RB1,IL18	Il18r1;Cd28;Cd86;Cd40;Ifng;Il4ra;Il12rb1;Il18
1269172	TCR signaling	BioSystems: REACTOME	3.142e-05	0.0793	0.0008229	0.006921	23	124	EVL,LAT,PAG1,CD3D,CD3E,CD3G,CD247,HLA-DQA1,HLA-DQB1,HLA-DRB5,UBC,WAS,ZAP70,PRKCQ,INPP5D,PSMC6,PTPN22,ITK,PTPRC,PTPRJ,TRAT1,LCK,LCP2	Evl;Lat;Pag1;Cd3d;Cd3e;Cd3g;Cd247;H2-Aa;H2-Ab1;H2-Eb1;Ubc;Was;Zap70;Prkcq;Inpp5d;Psmc6;Ptpn22;Itk;Ptprc;Ptprj;Trat1;Lck;Lcp2
PW:0000184	terpenoid biosynthetic	Pathway Ontology	3.163e-05	0.07982	0.0008229	0.006921	4	4	FDFT1,FDPS,SQLE,IDI1	Fdft1;Fdps;Sqle;Idi1
83074	Antigen processing and presentation	BioSystems: KEGG	3.406e-05	0.08598	0.000869	0.007309	17	77	CIITA,CD8A,CD8B,CD74,TNF,HLA-DMA,HLA-DMB,HLA-DQA1,HLA-DQB1,HLA-DRB5,HSPA4,IFNG,CTSB,CTSS,LGMN,KLRC1,KLRD1	Ciita;Cd8a;Cd8b1;Cd74;Tnf;H2-DMa;H2-DMb2;H2-Aa;H2-Ab1;H2-Eb1;Hspa4;Ifng;Ctsb;Ctss;Lgmn;Klrc1;Klrd1
1269897	Binding and Uptake of Ligands by Scavenger Receptors	BioSystems: REACTOME	3.695e-05	0.09327	0.0009327	0.007845	13	49	APOE,MSR1,SCARF1,MARCO,STAB1,CD36,SCARB1,CD163,HP,HPX,COL1A2,SCARA5,LRP1	Apoe;Msr1;Scarf1;Marco;Stab1;Cd36;Scarb1;Cd163;Hp;Hpx;Col1a2;Scara5;Lrp1
1474301	IL-17 signaling pathway	BioSystems: KEGG	3.81e-05	0.09616	0.0009521	0.008008	19	93	S100A8,S100A9,CCL11,MMP3,MMP9,MMP13,CXCL5,FOS,CASP3,CXCL2,CXCL3,TNF,CEBPB,IFNG,IKBKE,MAPK8,IL1B,PTGS2,LCN2	S100a8;S100a9;Ccl11;Mmp3;Mmp9;Mmp13;Cxcl5;Fos;Casp3;Cxcl2;Cxcl3;Tnf;Cebpb;Ifng;Ikbke;Mapk8;Il1b;Ptgs2;Lcn2
M3008	Genes encoding structural ECM glycoproteins	MSigDB C2 BIOCARTA (v6.0)	3.985e-05	0.1006	0.000986	0.008293	31	196	MATN2,LRG1,SVEP1,FBLN2,EFEMP1,MGP,SPON1,SRPX,CILP,POSTN,SLIT3,GAS6,FGL2,FNDC1,NID1,BMPER,EMILIN1,TGFBI,THBS1,TNXB,ADIPOQ,VWF,ABI3BP,SNED1,IGFBP5,CTGF,CRISPLD2,DPT,MFAP5,LGI2,LTBP2	Matn2;Lrg1;Svep1;Fbln2;Efemp1;Mgp;Spon1;Srpx;Cilp;Postn;Slit3;Gas6;Fgl2;Fndc1;Nid1;Bmper;Emilin1;Tgfbi;Thbs1;Tnxb;Adipoq;Vwf;Abi3bp;Sned1;Igfbp5;Ctgf;Crispld2;Dpt;Mfap5;Lgi2;Ltbp2
1269234	Toll Like Receptor 4 (TLR4) Cascade	BioSystems: REACTOME	4.09e-05	0.1032	0.001002	0.00843	23	126	NOD1,FOS,BTK,RIPK3,CD14,CD36,TLR1,TLR2,TLR4,IRAK3,UBC,LY86,MAP3K8,ATF2,IKBKE,MAPK8,MAP2K6,IRAK2,ITGAM,ITGB2,MAPKAPK3,DUSP4,CD180	Nod1;Fos;Btk;Ripk3;Cd14;Cd36;Tlr1;Tlr2;Tlr4;Irak3;Ubc;Ly86;Map3k8;Atf2;Ikbke;Mapk8;Map2k6;Irak2;Itgam;Itgb2;Mapkapk3;Dusp4;Cd180
M11736	Cytokines can induce activation of matrix metalloproteinases, which degrade extracellular matrix.	MSigDB C2 BIOCARTA (v6.0)	4.343e-05	0.1096	0.001044	0.00878	7	15	FCGR3A,SELL,SPN,TGFB2,TNF,TNFRSF1B,IL1B	Fcgr4;Sell;Spn;Tgfb2;Tnf;Tnfrsf1b;Il1b
1269545	Class A/1 (Rhodopsin-like receptors)	BioSystems: REACTOME	4.658e-05	0.1176	0.001109	0.009328	44	322	MC2R,CCR2,ADORA1,ADRB3,AGTR1,APLNR,CXCL9,CCL5,CXCL5,CXCL12,GPR65,FPR1,FPR2,CXCL13,CXCR6,ACKR1,HCAR2,P2RY13,P2RY10,C3,C5AR1,CXCR3,GPR18,GPR35,FFAR2,CXCL16,CXCL2,CXCL3,P2RY6,PF4,CCR1,CCR5,LTB4R,PSAP,PTGER2,PTGER4,PTGIR,CXCR4,ACKR3,P2RY14,GPR183,ECE1,S1PR3,GPR68	Mc2r;Ccr2;Adora1;Adrb3;Agtr1a;Aplnr;Cxcl9;Ccl5;Cxcl5;Cxcl12;Gpr65;Fpr1;Fpr2;Cxcl13;Cxcr6;Ackr1;Hcar2;P2ry13;P2ry10;C3;C5ar1;Cxcr3;Gpr18;Gpr35;Ffar2;Cxcl16;Cxcl2;Cxcl3;P2ry6;Pf4;Ccr1;Ccr5;Ltb4r1;Psap;Ptger2;Ptger4;Ptgir;Cxcr4;Ackr3;P2ry14;Gpr183;Ece1;S1pr3;Gpr68
M16355	Ras-Independent pathway in NK cell-mediated cytotoxicity	MSigDB C2 BIOCARTA (v6.0)	4.719e-05	0.1191	0.001113	0.009363	8	20	PTK2B,LAT,SYK,VAV1,IL18,PTPN6,KLRC1,KLRD1	Ptk2b;Lat;Syk;Vav1;Il18;Ptpn6;Klrc1;Klrd1
634527	NF-kappa B signaling pathway	BioSystems: KEGG	5.188e-05	0.1309	0.001167	0.009819	19	95	CXCL12,LAT,BTK,SYK,CXCL2,CD14,TLR4,CD40,TNFRSF13C,TNF,ICAM1,ZAP70,CSNK2A1,PRKCB,PRKCQ,IL1B,PTGS2,LCK,LTB	Cxcl12;Lat;Btk;Syk;Cxcl2;Cd14;Tlr4;Cd40;Tnfrsf13c;Tnf;Icam1;Zap70;Csnk2a1;Prkcb;Prkcq;Il1b;Ptgs2;Lck;Ltb
1269279	Fcgamma receptor (FCGR) dependent phagocytosis	BioSystems: REACTOME	5.188e-05	0.1309	0.001167	0.009819	19	95	FCGR1A,FCGR2A,FCGR3A,BAIAP2,FGR,CYFIP2,BTK,SYK,CD3G,CD247,HCK,PLD3,PLD1,VAV1,WAS,YES1,ELMO1,PLD4,ABI2	Fcgr1;Fcgr3;Fcgr4;Baiap2;Fgr;Cyfip2;Btk;Syk;Cd3g;Cd247;Hck;Pld3;Pld1;Vav1;Was;Yes1;Elmo1;Pld4;Abi2
M1473	B Lymphocyte Cell Surface Molecules	MSigDB C2 BIOCARTA (v6.0)	5.227e-05	0.1319	0.001167	0.009819	6	11	FCGR2B,CD40,ICAM1,ITGAL,ITGB2,PTPRC	Fcgr2b;Cd40;Icam1;Itgal;Itgb2;Ptprc
1269160	MyD88 deficiency (TLR2/4)	BioSystems: REACTOME	5.227e-05	0.1319	0.001167	0.009819	6	11	BTK,CD14,CD36,TLR1,TLR2,TLR4	Btk;Cd14;Cd36;Tlr1;Tlr2;Tlr4
1269158	IRAK4 deficiency (TLR2/4)	BioSystems: REACTOME	5.227e-05	0.1319	0.001167	0.009819	6	11	BTK,CD14,CD36,TLR1,TLR2,TLR4	Btk;Cd14;Cd36;Tlr1;Tlr2;Tlr4
P00014	Cholesterol biosynthesis	PantherDB	5.227e-05	0.1319	0.001167	0.009819	6	11	FDFT1,FDPS,MVD,SQLE,HMGCS1,LSS	Fdft1;Fdps;Mvd;Sqle;Hmgcs1;Lss
83042	PPAR signaling pathway	BioSystems: KEGG	5.294e-05	0.1336	0.001172	0.009859	16	72	FABP4,FABP5,PLIN2,FABP7,ACSL1,ACSL3,PLIN4,CD36,PCK1,UBC,ADIPOQ,FADS2,PLTP,PPARG,NR1H3,LPL	Fabp4;Fabp5;Plin2;Fabp7;Acsl1;Acsl3;Plin4;Cd36;Pck1;Ubc;Adipoq;Fads2;Pltp;Pparg;Nr1h3;Lpl
1270420	Detoxification of Reactive Oxygen Species	BioSystems: REACTOME	6.108e-05	0.1542	0.001333	0.01121	11	38	NCF1,GPX8,SOD2,SOD3,NCF2,NCF4,GPX3,GPX7,PRDX5,CYBA,CYBB	Ncf1;Gpx8;Sod2;Sod3;Ncf2;Ncf4;Gpx3;Gpx7;Prdx5;Cyba;Cybb
1427857	Regulation of TLR by endogenous ligand	BioSystems: REACTOME	7.231e-05	0.1825	0.001542	0.01297	7	16	S100A8,S100A9,CD14,CD36,TLR1,TLR2,TLR4	S100a8;S100a9;Cd14;Cd36;Tlr1;Tlr2;Tlr4
137976	IL2-mediated signaling events	BioSystems: Pathway Interaction Database	7.269e-05	0.1835	0.001542	0.01297	13	52	PTK2B,IKZF3,FOS,IRS2,STAT1,SYK,SOCS3,DOK2,IFNG,PRKCB,MAPK8,IL2RB,LCK	Ptk2b;Ikzf3;Fos;Irs2;Stat1;Syk;Socs3;Dok2;Ifng;Prkcb;Mapk8;Il2rb;Lck
M1908	Fc Epsilon Receptor I Signaling in Mast Cells	MSigDB C2 BIOCARTA (v6.0)	7.948e-05	0.2006	0.001672	0.01406	11	39	FCER1A,FCER1G,FOS,NFATC2,BTK,SYK,PIK3CG,VAV1,PPP3CA,PRKCB,MAPK8	Fcer1a;Fcer1g;Fos;Nfatc2;Btk;Syk;Pik3cg;Vav1;Ppp3ca;Prkcb;Mapk8
1270002	Lipid digestion, mobilization, and transport	BioSystems: REACTOME	8.674e-05	0.2189	0.001809	0.01522	21	115	A2M,ABCA1,FABP4,FABP5,FABP7,NPC2,APOC1,APOC2,APOE,CIDEC,APOBR,SCARB1,PCSK5,MGLL,LIPG,PLTP,VLDLR,ABCG1,NR1H3,LIPE,LPL	A2m;Abca1;Fabp4;Fabp5;Fabp7;Npc2;Apoc1;Apoc2;Apoe;Cidec;Apobr;Scarb1;Pcsk5;Mgll;Lipg;Pltp;Vldlr;Abcg1;Nr1h3;Lipe;Lpl
1270247	Assembly of collagen fibrils and other multimeric structures	BioSystems: REACTOME	8.758e-05	0.2211	0.001812	0.01524	14	60	MMP3,MMP9,MMP13,COL1A2,COL4A5,COL5A2,COL6A2,COL9A1,COL11A1,COL27A1,CTSB,CTSS,LOX,LOXL1	Mmp3;Mmp9;Mmp13;Col1a2;Col4a5;Col5a2;Col6a2;Col9a1;Col11a1;Col27a1;Ctsb;Ctss;Lox;Loxl1
114228	Fc gamma R-mediated phagocytosis	BioSystems: KEGG	9.429e-05	0.238	0.001846	0.01553	18	91	NCF1,FCGR1A,FCGR2A,FCGR2B,FCGR3A,LAT,SYK,GSN,HCK,PIK3CD,PLD1,VAV1,WAS,PRKCB,INPP5D,PTPRC,RAC2,DOCK2	Ncf1;Fcgr1;Fcgr3;Fcgr2b;Fcgr4;Lat;Syk;Gsn;Hck;Pik3cd;Pld1;Vav1;Was;Prkcb;Inpp5d;Ptprc;Rac2;Dock2
SMP00119	Fluvastatin Pathway	SMPDB	9.803e-05	0.2474	0.001846	0.01553	6	12	FDFT1,FDPS,MVD,SQLE,HMGCS1,LSS	Fdft1;Fdps;Mvd;Sqle;Hmgcs1;Lss
SMP00079	Ibandronate Pathway	SMPDB	9.803e-05	0.2474	0.001846	0.01553	6	12	FDFT1,FDPS,MVD,SQLE,HMGCS1,LSS	Fdft1;Fdps;Mvd;Sqle;Hmgcs1;Lss
SMP00117	Pamidronate Pathway	SMPDB	9.803e-05	0.2474	0.001846	0.01553	6	12	FDFT1,FDPS,MVD,SQLE,HMGCS1,LSS	Fdft1;Fdps;Mvd;Sqle;Hmgcs1;Lss
SMP00131	Atorvastatin Pathway	SMPDB	9.803e-05	0.2474	0.001846	0.01553	6	12	FDFT1,FDPS,MVD,SQLE,HMGCS1,LSS	Fdft1;Fdps;Mvd;Sqle;Hmgcs1;Lss
SMP00107	Zoledronate Pathway	SMPDB	9.803e-05	0.2474	0.001846	0.01553	6	12	FDFT1,FDPS,MVD,SQLE,HMGCS1,LSS	Fdft1;Fdps;Mvd;Sqle;Hmgcs1;Lss
SMP00099	Lovastatin Pathway	SMPDB	9.803e-05	0.2474	0.001846	0.01553	6	12	FDFT1,FDPS,MVD,SQLE,HMGCS1,LSS	Fdft1;Fdps;Mvd;Sqle;Hmgcs1;Lss
SMP00089	Pravastatin Pathway	SMPDB	9.803e-05	0.2474	0.001846	0.01553	6	12	FDFT1,FDPS,MVD,SQLE,HMGCS1,LSS	Fdft1;Fdps;Mvd;Sqle;Hmgcs1;Lss
SMP00092	Rosuvastatin Pathway	SMPDB	9.803e-05	0.2474	0.001846	0.01553	6	12	FDFT1,FDPS,MVD,SQLE,HMGCS1,LSS	Fdft1;Fdps;Mvd;Sqle;Hmgcs1;Lss
SMP00095	Alendronate pathway	SMPDB	9.803e-05	0.2474	0.001846	0.01553	6	12	FDFT1,FDPS,MVD,SQLE,HMGCS1,LSS	Fdft1;Fdps;Mvd;Sqle;Hmgcs1;Lss
SMP00112	Risedronate Pathway	SMPDB	9.803e-05	0.2474	0.001846	0.01553	6	12	FDFT1,FDPS,MVD,SQLE,HMGCS1,LSS	Fdft1;Fdps;Mvd;Sqle;Hmgcs1;Lss
SMP00111	Cerivastatin Pathway	SMPDB	9.803e-05	0.2474	0.001846	0.01553	6	12	FDFT1,FDPS,MVD,SQLE,HMGCS1,LSS	Fdft1;Fdps;Mvd;Sqle;Hmgcs1;Lss
1269101	Nef and signal transduction	BioSystems: REACTOME	9.898e-05	0.2498	0.001851	0.01557	5	8	CD247,HCK,ELMO1,DOCK2,LCK	Cd247;Hck;Elmo1;Dock2;Lck
M9177	Dendritic cells in regulating TH1 and TH2 Development	MSigDB C2 BIOCARTA (v6.0)	0.0001049	0.2648	0.001947	0.01638	8	22	ANPEP,CD2,CD5,TLR2,TLR4,CD40,IFNG,IL10	Anpep;Cd2;Cd5;Tlr2;Tlr4;Cd40;Ifng;Il10
1269241	Complement cascade	BioSystems: REACTOME	0.0001106	0.279	0.002022	0.01701	13	54	CFB,C1QA,C1QB,C1QC,C1R,C1S,C2,C3,C5AR1,C6,CFH,CD55,CFD	Cfb;C1qa;C1qb;C1qc;C1ra;C1s1;C2;C3;C5ar1;C6;Cfh;Cd55;Cfd
M6778	IL-10 Anti-inflammatory Signaling Pathway	MSigDB C2 BIOCARTA (v6.0)	0.0001151	0.2906	0.002091	0.01759	7	17	STAT1,STAT4,TNF,HMOX1,IL1A,IL10,IL10RA	Stat1;Stat4;Tnf;Hmox1;Il1a;Il10;Il10ra
1270245	Collagen formation	BioSystems: REACTOME	0.0001264	0.3191	0.002279	0.01917	18	93	MMP3,MMP9,MMP13,P3H3,COL14A1,COL1A2,COL4A5,COL5A2,COL6A2,COL9A1,COL11A1,COL12A1,ADAMTS2,COL27A1,CTSB,CTSS,LOX,LOXL1	Mmp3;Mmp9;Mmp13;P3h3;Col14a1;Col1a2;Col4a5;Col5a2;Col6a2;Col9a1;Col11a1;Col12a1;Adamts2;Col27a1;Ctsb;Ctss;Lox;Loxl1
138073	C-MYB transcription factor network	BioSystems: Pathway Interaction Database	0.0001458	0.3679	0.002591	0.02179	16	78	TFEC,ANPEP,SPI1,GSTM1,CDK6,CEBPA,CEBPB,CEBPD,PIM1,COL1A2,COPA,PPP3CA,CSF1R,PTGS2,LYZ,MAF	Tfec;Anpep;Spi1;Gstm1;Cdk6;Cebpa;Cebpb;Cebpd;Pim1;Col1a2;Copa;Ppp3ca;Csf1r;Ptgs2;Lyz1;Maf
137933	IL4-mediated signaling events	BioSystems: Pathway Interaction Database	0.0001535	0.3874	0.002709	0.02278	14	63	FES,CCL11,SELP,ARG1,IRS2,SPI1,SOCS3,DOK2,THY1,CEBPB,COL1A2,IL4R,IL10,PTPN6	Fes;Ccl11;Selp;Arg1;Irs2;Spi1;Socs3;Dok2;Thy1;Cebpb;Col1a2;Il4ra;Il10;Ptpn6
1269200	MHC class II antigen presentation	BioSystems: REACTOME	0.0001616	0.4079	0.002832	0.02382	19	103	DYNLL1,CTSF,AP1S2,CD74,HLA-DMA,HLA-DMB,CENPE,HLA-DQA1,HLA-DQB1,CTSC,HLA-DRB5,CTSB,CTSE,CTSH,CTSS,LGMN,KLC1,KIF11,LAG3	Dynll1;Ctsf;Ap1s2;Cd74;H2-DMa;H2-DMb2;Cenpe;H2-Aa;H2-Ab1;Ctsc;H2-Eb1;Ctsb;Ctse;Ctsh;Ctss;Lgmn;Klc1;Kif11;Lag3
83081	B cell receptor signaling pathway	BioSystems: KEGG	0.000165	0.4165	0.002872	0.02416	15	71	PIK3AP1,FCGR2B,FOS,IFITM1,NFATC2,BTK,SYK,LILRB3,PIK3CD,VAV1,PPP3CA,PRKCB,INPP5D,PTPN6,RAC2	Pik3ap1;Fcgr2b;Fos;Ifitm1;Nfatc2;Btk;Syk;Pirb;Pik3cd;Vav1;Ppp3ca;Prkcb;Inpp5d;Ptpn6;Rac2
PW:0000482	lipoprotein metabolic	Pathway Ontology	0.0001707	0.4309	0.002873	0.02416	6	13	APOBEC1,APOC1,APOC2,APOE,SCARB1,LPL	Apobec1;Apoc1;Apoc2;Apoe;Scarb1;Lpl
142267	cholesterol biosynthesis I	BioSystems: BIOCYC	0.0001707	0.4309	0.002873	0.02416	6	13	MSMO1,FDFT1,SQLE,CYP51A1,DHCR24,LSS	Msmo1;Fdft1;Sqle;Cyp51;Dhcr24;Lss
1269521	RHO GTPases Activate NADPH Oxidases	BioSystems: REACTOME	0.0001707	0.4309	0.002873	0.02416	6	13	NCF1,NCF2,NCF4,CYBA,CYBB,RAC2	Ncf1;Ncf2;Ncf4;Cyba;Cybb;Rac2
142268	cholesterol biosynthesis III (via desmosterol)	BioSystems: BIOCYC	0.0001707	0.4309	0.002873	0.02416	6	13	MSMO1,FDFT1,SQLE,CYP51A1,DHCR24,LSS	Msmo1;Fdft1;Sqle;Cyp51;Dhcr24;Lss
142266	cholesterol biosynthesis II (via 24,25-dihydrolanosterol)	BioSystems: BIOCYC	0.0001707	0.4309	0.002873	0.02416	6	13	MSMO1,FDFT1,SQLE,CYP51A1,DHCR24,LSS	Msmo1;Fdft1;Sqle;Cyp51;Dhcr24;Lss
M2349	Pertussis toxin-insensitive CCR5 Signaling in Macrophage	MSigDB C2 BIOCARTA (v6.0)	0.0001765	0.4455	0.00295	0.02481	7	18	PTK2B,CXCL12,FOS,CCR5,PRKCB,MAPK8,CXCR4	Ptk2b;Cxcl12;Fos;Ccr5;Prkcb;Mapk8;Cxcr4
P00010	B cell activation	PantherDB	0.0002392	0.6038	0.003972	0.03341	13	58	FOS,NFATC2,BTK,SYK,PIK3CD,PIK3CG,VAV1,PPP3CA,PRKCB,MAPK8,PTPN6,PTPRC,RAC2	Fos;Nfatc2;Btk;Syk;Pik3cd;Pik3cg;Vav1;Ppp3ca;Prkcb;Mapk8;Ptpn6;Ptprc;Rac2
M16966	Stathmin and breast cancer resistance to antimicrotubule agents	MSigDB C2 BIOCARTA (v6.0)	0.0002618	0.6608	0.004319	0.03633	7	19	CAMK4,CAMK2A,CD2,CD3D,CD3E,CD3G,CD247	Camk4;Camk2a;Cd2;Cd3d;Cd3e;Cd3g;Cd247
1474302	Fluid shear stress and atherosclerosis	BioSystems: KEGG	0.0002673	0.6747	0.004354	0.03662	23	142	NCF1,MGST1,MMP9,SDC2,FOS,NCF2,GSTA2,GSTM1,GSTT2,TNF,PECAM1,HMOX1,PIK3CD,ICAM1,IFNG,MAPK8,IL1A,IL1B,MAP2K6,CYBA,CYBB,RAC2,DUSP1	Ncf1;Mgst1;Mmp9;Sdc2;Fos;Ncf2;Gsta2;Gstm1;Gstt2;Tnf;Pecam1;Hmox1;Pik3cd;Icam1;Ifng;Mapk8;Il1a;Il1b;Map2k6;Cyba;Cybb;Rac2;Dusp1
1270005	Lipoprotein metabolism	BioSystems: REACTOME	0.0002674	0.6749	0.004354	0.03662	15	74	A2M,ABCA1,NPC2,APOC1,APOC2,APOE,CIDEC,APOBR,SCARB1,PCSK5,PLTP,VLDLR,ABCG1,NR1H3,LPL	A2m;Abca1;Npc2;Apoc1;Apoc2;Apoe;Cidec;Apobr;Scarb1;Pcsk5;Pltp;Vldlr;Abcg1;Nr1h3;Lpl
1269242	Initial triggering of complement	BioSystems: REACTOME	0.000279	0.7042	0.004514	0.03797	9	31	CFB,C1QA,C1QB,C1QC,C1R,C1S,C2,C3,CFD	Cfb;C1qa;C1qb;C1qc;C1ra;C1s1;C2;C3;Cfd
1269544	GPCR ligand binding	BioSystems: REACTOME	0.0003079	0.7771	0.00495	0.04163	54	455	RAMP2,RAMP1,MC2R,ADM,CCR2,ADORA1,ADRB3,AGTR1,APLNR,CXCL9,CCL5,CXCL5,CXCL12,GPR65,FPR1,FPR2,CXCL13,CXCR6,SMO,ACKR1,HCAR2,P2RY13,P2RY10,C3,C5AR1,GNGT2,CXCR3,GPR18,GPR35,FFAR2,CXCL16,CXCL2,CXCL3,P2RY6,ADGRE5,GNG2,PF4,CCR1,CCR5,LTB4R,PSAP,CD55,PTGER2,PTGER4,PTGIR,PTH1R,CXCR4,ACKR3,P2RY14,GPR183,ECE1,S1PR3,GPR68,ADGRE1	Ramp2;Ramp1;Mc2r;Adm;Ccr2;Adora1;Adrb3;Agtr1a;Aplnr;Cxcl9;Ccl5;Cxcl5;Cxcl12;Gpr65;Fpr1;Fpr2;Cxcl13;Cxcr6;Smo;Ackr1;Hcar2;P2ry13;P2ry10;C3;C5ar1;Gngt2;Cxcr3;Gpr18;Gpr35;Ffar2;Cxcl16;Cxcl2;Cxcl3;P2ry6;Adgre5;Gng2;Pf4;Ccr1;Ccr5;Ltb4r1;Psap;Cd55;Ptger2;Ptger4;Ptgir;Pth1r;Cxcr4;Ackr3;P2ry14;Gpr183;Ece1;S1pr3;Gpr68;Adgre1
83082	Fc epsilon RI signaling pathway	BioSystems: KEGG	0.0003585	0.9048	0.005727	0.04817	14	68	FCER1A,FCER1G,ALOX5AP,LAT,BTK,SYK,TNF,PIK3CD,VAV1,MAPK8,MAP2K6,INPP5D,RAC2,LCP2	Fcer1a;Fcer1g;Alox5ap;Lat;Btk;Syk;Tnf;Pik3cd;Vav1;Mapk8;Map2k6;Inpp5d;Rac2;Lcp2
137913	Alpha-synuclein signaling	BioSystems: Pathway Interaction Database	0.0003631	0.9165	0.005764	0.04848	9	32	MAOB,PTK2B,FGR,SYK,HCK,PLD1,YES1,CSNK2A1,LCK	Maob;Ptk2b;Fgr;Syk;Hck;Pld1;Yes1;Csnk2a1;Lck
1270007	HDL-mediated lipid transport	BioSystems: REACTOME	0.0003774	0.9525	0.005953	0.05007	7	20	A2M,ABCA1,APOC2,APOE,SCARB1,PLTP,ABCG1	A2m;Abca1;Apoc2;Apoe;Scarb1;Pltp;Abcg1
1457778	Metal sequestration by antimicrobial proteins	BioSystems: REACTOME	0.0003872	0.9774	0.006033	0.05074	4	6	S100A8,S100A9,LCN2,LTF	S100a8;S100a9;Lcn2;Ltf
1270093	Synthesis of Lipoxins (LX)	BioSystems: REACTOME	0.0003872	0.9774	0.006033	0.05074	4	6	ALOX5AP,PTGR1,HPGD,LTC4S	Alox5ap;Ptgr1;Hpgd;Ltc4s
1108784	reactive oxygen species degradation	BioSystems: BIOCYC	0.0003931	0.9921	0.006087	0.05119	5	10	GPX8,SOD2,SOD3,GPX3,GPX7	Gpx8;Sod2;Sod3;Gpx3;Gpx7
1270087	Arachidonic acid metabolism	BioSystems: REACTOME	0.0004053	1	0.006237	0.05246	13	61	EPHX2,ALOX5AP,FAM213B,CYP4F2,PTGR1,GGT1,TBXAS1,HPGD,PTGES,CYP1B1,CYP4B1,PTGS2,LTC4S	Ephx2;Alox5ap;Fam213b;Cyp4f18;Ptgr1;Ggt1;Tbxas1;Hpgd;Ptges;Cyp1b1;Cyp4b1;Ptgs2;Ltc4s
1269314	Interferon gamma signaling	BioSystems: REACTOME	0.0004476	1	0.006771	0.05695	17	94	FCGR1A,CIITA,GBP2,GBP3,STAT1,TRIM2,CAMK2A,SOCS3,HLA-DQA1,HLA-DQB1,HLA-DRB5,ICAM1,IRF8,IFNG,GBP6,IRF5,PTPN6	Fcgr1;Ciita;Gbp2;Gbp2b;Stat1;Trim2;Camk2a;Socs3;H2-Aa;H2-Ab1;H2-Eb1;Icam1;Irf8;Ifng;Gbp6;Irf5;Ptpn6
82973	Glutathione metabolism	BioSystems: KEGG	0.000448	1	0.006771	0.05695	12	54	MGST1,OPLAH,ANPEP,GPX8,GSTK1,GGT1,GGT7,GPX3,GPX7,GSTA2,GSTM1,GSTT2	Mgst1;Oplah;Anpep;Gpx8;Gstk1;Ggt1;Ggt7;Gpx3;Gpx7;Gsta2;Gstm1;Gstt2
M12095	Signal transduction through IL1R	MSigDB C2 BIOCARTA (v6.0)	0.0004671	1	0.006989	0.05878	9	33	TGFB2,IRAK3,TNF,MAPK8,IL1A,IL1B,IL1RN,MAP2K6,IRAK2	Tgfb2;Irak3;Tnf;Mapk8;Il1a;Il1b;Il1rn;Map2k6;Irak2
1270213	Glutathione conjugation	BioSystems: REACTOME	0.0004908	1	0.007287	0.06129	10	40	MGST1,OPLAH,GSTK1,CNDP2,CHAC2,GGT1,GGT7,GSTA2,GSTM1,GSTT2	Mgst1;Oplah;Gstk1;Cndp2;Chac2;Ggt1;Ggt7;Gsta2;Gstm1;Gstt2
1269237	MyD88:Mal cascade initiated on plasma membrane	BioSystems: REACTOME	0.0005086	1	0.007378	0.06205	17	95	NOD1,FOS,BTK,CD14,CD36,TLR1,TLR2,TLR4,IRAK3,UBC,MAP3K8,ATF2,MAPK8,MAP2K6,IRAK2,MAPKAPK3,DUSP4	Nod1;Fos;Btk;Cd14;Cd36;Tlr1;Tlr2;Tlr4;Irak3;Ubc;Map3k8;Atf2;Mapk8;Map2k6;Irak2;Mapkapk3;Dusp4
1269239	Toll Like Receptor TLR1:TLR2 Cascade	BioSystems: REACTOME	0.0005086	1	0.007378	0.06205	17	95	NOD1,FOS,BTK,CD14,CD36,TLR1,TLR2,TLR4,IRAK3,UBC,MAP3K8,ATF2,MAPK8,MAP2K6,IRAK2,MAPKAPK3,DUSP4	Nod1;Fos;Btk;Cd14;Cd36;Tlr1;Tlr2;Tlr4;Irak3;Ubc;Map3k8;Atf2;Mapk8;Map2k6;Irak2;Mapkapk3;Dusp4
1269238	Toll Like Receptor 2 (TLR2) Cascade	BioSystems: REACTOME	0.0005086	1	0.007378	0.06205	17	95	NOD1,FOS,BTK,CD14,CD36,TLR1,TLR2,TLR4,IRAK3,UBC,MAP3K8,ATF2,MAPK8,MAP2K6,IRAK2,MAPKAPK3,DUSP4	Nod1;Fos;Btk;Cd14;Cd36;Tlr1;Tlr2;Tlr4;Irak3;Ubc;Map3k8;Atf2;Mapk8;Map2k6;Irak2;Mapkapk3;Dusp4
1269240	Toll Like Receptor TLR6:TLR2 Cascade	BioSystems: REACTOME	0.0005086	1	0.007378	0.06205	17	95	NOD1,FOS,BTK,CD14,CD36,TLR1,TLR2,TLR4,IRAK3,UBC,MAP3K8,ATF2,MAPK8,MAP2K6,IRAK2,MAPKAPK3,DUSP4	Nod1;Fos;Btk;Cd14;Cd36;Tlr1;Tlr2;Tlr4;Irak3;Ubc;Map3k8;Atf2;Mapk8;Map2k6;Irak2;Mapkapk3;Dusp4
M18215	Role of Tob in T-cell activation	MSigDB C2 BIOCARTA (v6.0)	0.0005304	1	0.00765	0.06434	7	21	TGFB2,CD3D,CD3E,CD3G,CD247,CD28,IFNG	Tgfb2;Cd3d;Cd3e;Cd3g;Cd247;Cd28;Ifng
83076	Toll-like receptor signaling pathway	BioSystems: KEGG	0.0005354	1	0.007678	0.06458	18	104	CXCL9,CCL5,FOS,STAT1,CD14,CD86,TLR1,TLR2,TLR4,CD40,TNF,PIK3CD,MAP3K8,IKBKE,MAPK8,IL1B,MAP2K6,IRF5	Cxcl9;Ccl5;Fos;Stat1;Cd14;Cd86;Tlr1;Tlr2;Tlr4;Cd40;Tnf;Pik3cd;Map3k8;Ikbke;Mapk8;Il1b;Map2k6;Irf5
138011	CXCR3-mediated signaling events	BioSystems: Pathway Interaction Database	0.0005943	1	0.008474	0.07128	9	34	CXCL9,CCL11,CXCL13,CXCR3,GNG2,PF4,MAP2K6,ITGAL,ITGB2	Cxcl9;Ccl11;Cxcl13;Cxcr3;Gng2;Pf4;Map2k6;Itgal;Itgb2
99052	Lysosome	BioSystems: KEGG	0.0006231	1	0.008836	0.07432	20	123	ACP5,NPC2,SLC11A1,CTSF,GM2A,AP1S2,GNS,CD68,CTSC,PPT2,CLN3,NAPSA,CTSB,CTSE,CTSH,CTSS,CTSW,LGMN,PSAP,LAPTM5	Acp5;Npc2;Slc11a1;Ctsf;Gm2a;Ap1s2;Gns;Cd68;Ctsc;Ppt2;Cln3;Napsa;Ctsb;Ctse;Ctsh;Ctss;Ctsw;Lgmn;Psap;Laptm5
142418	triacylglycerol degradation	BioSystems: BIOCYC	0.0006771	1	0.009547	0.0803	5	11	ABHD6,MGLL,LIPG,PNPLA2,LIPE	Abhd6;Mgll;Lipg;Pnpla2;Lipe
1269236	Activated TLR4 signalling	BioSystems: REACTOME	0.0006901	1	0.009677	0.08139	19	115	NOD1,FOS,BTK,RIPK3,CD14,CD36,TLR1,TLR2,TLR4,IRAK3,UBC,MAP3K8,ATF2,IKBKE,MAPK8,MAP2K6,IRAK2,MAPKAPK3,DUSP4	Nod1;Fos;Btk;Ripk3;Cd14;Cd36;Tlr1;Tlr2;Tlr4;Irak3;Ubc;Map3k8;Atf2;Ikbke;Mapk8;Map2k6;Irak2;Mapkapk3;Dusp4
M5880	Genes encoding proteins affiliated structurally or functionally to extracellular matrix proteins	MSigDB C2 BIOCARTA (v6.0)	0.0007282	1	0.01015	0.08541	25	171	SEMA3A,C1QTNF1,CLEC10A,SDC2,SEMA4F,SEMA4D,SEMA3C,ANXA6,CLEC4D,C1QA,C1QB,C1QC,SEMA4A,PLXDC2,CLEC3B,CLEC5A,CLEC7A,HPX,PLXNB1,PARM1,CSPG4,CLEC4E,CLEC4A,CLEC6A,ANXA8	Sema3a;C1qtnf1;Clec10a;Sdc2;Sema4f;Sema4d;Sema3c;Anxa6;Clec4d;C1qa;C1qb;C1qc;Sema4a;Plxdc2;Clec3b;Clec5a;Clec7a;Hpx;Plxnb1;Parm1;Cspg4;Clec4e;Clec4a2;Clec4n;Anxa8
1270039	Activation of gene expression by SREBF (SREBP)	BioSystems: REACTOME	0.0007448	1	0.01027	0.08635	10	42	FDFT1,FDPS,MVD,SQLE,HMGCS1,ELOVL6,IDI1,HELZ2,CYP51A1,LSS	Fdft1;Fdps;Mvd;Sqle;Hmgcs1;Elovl6;Idi1;Helz2;Cyp51;Lss
1269282	Role of phospholipids in phagocytosis	BioSystems: REACTOME	0.0007485	1	0.01027	0.08635	9	35	FCGR1A,FCGR2A,FCGR3A,SYK,CD3G,CD247,PLD3,PLD1,PLD4	Fcgr1;Fcgr3;Fcgr4;Syk;Cd3g;Cd247;Pld3;Pld1;Pld4
138017	Signaling events mediated by PTP1B	BioSystems: Pathway Interaction Database	0.0008401	1	0.01146	0.09641	11	50	FCGR2A,FGR,LAT,SOCS3,HCK,PDGFRB,TYK2,YES1,CSF1R,LCK,EGFR	Fcgr3;Fgr;Lat;Socs3;Hck;Pdgfrb;Tyk2;Yes1;Csf1r;Lck;Egfr
1269100	The role of Nef in HIV-1 replication and disease pathogenesis	BioSystems: REACTOME	0.000887	1	0.01204	0.1012	8	29	AP1S2,CD247,CD8B,CD28,HCK,ELMO1,DOCK2,LCK	Ap1s2;Cd247;Cd8b1;Cd28;Hck;Elmo1;Dock2;Lck
137932	IL6-mediated signaling events	BioSystems: Pathway Interaction Database	0.0009076	1	0.01225	0.103	10	43	A2M,FOS,STAT1,SOCS3,HCK,CEBPB,CEBPD,TYK2,VAV1,MAP2K6	A2m;Fos;Stat1;Socs3;Hck;Cebpb;Cebpd;Tyk2;Vav1;Map2k6
M19422	IL 17 Signaling Pathway	MSigDB C2 BIOCARTA (v6.0)	0.0009534	1	0.0128	0.1077	6	17	CD2,CD3D,CD3E,CD3G,CD247,CD8A	Cd2;Cd3d;Cd3e;Cd3g;Cd247;Cd8a
1269375	PECAM1 interactions	BioSystems: REACTOME	0.001091	1	0.01457	0.1225	5	12	PECAM1,YES1,INPP5D,PTPN6,LCK	Pecam1;Yes1;Inpp5d;Ptpn6;Lck
M6327	Activation of Csk by cAMP-dependent Protein Kinase Inhibits Signaling through the T Cell Receptor	MSigDB C2 BIOCARTA (v6.0)	0.001299	1	0.01726	0.1452	7	24	CD3D,CD3E,CD3G,CD247,ZAP70,PTPRC,LCK	Cd3d;Cd3e;Cd3g;Cd247;Zap70;Ptprc;Lck
M9526	T Cell Signal Transduction	MSigDB C2 BIOCARTA (v6.0)	0.001321	1	0.01745	0.1468	10	45	LAT,CD3D,CD28,VAV1,ZAP70,ITK,PTPRC,LCK,LCP2,RASGRP1	Lat;Cd3d;Cd28;Vav1;Zap70;Itk;Ptprc;Lck;Lcp2;Rasgrp1
1269546	Peptide ligand-binding receptors	BioSystems: REACTOME	0.00133	1	0.01749	0.1471	26	188	MC2R,CCR2,AGTR1,APLNR,CXCL9,CCL5,CXCL5,CXCL12,FPR1,FPR2,CXCL13,CXCR6,ACKR1,C3,C5AR1,CXCR3,CXCL16,CXCL2,CXCL3,PF4,CCR1,CCR5,PSAP,CXCR4,ACKR3,ECE1	Mc2r;Ccr2;Agtr1a;Aplnr;Cxcl9;Ccl5;Cxcl5;Cxcl12;Fpr1;Fpr2;Cxcl13;Cxcr6;Ackr1;C3;C5ar1;Cxcr3;Cxcl16;Cxcl2;Cxcl3;Pf4;Ccr1;Ccr5;Psap;Cxcr4;Ackr3;Ece1
PW:0000485	eicosanoids metabolic	Pathway Ontology	0.001342	1	0.01755	0.1476	6	18	MGST1,GGT1,TBXAS1,PTGES,PTGS2,LTC4S	Mgst1;Ggt1;Tbxas1;Ptges;Ptgs2;Ltc4s
169353	Validated targets of C-MYC transcriptional repression	BioSystems: Pathway Interaction Database	0.001414	1	0.01839	0.1547	12	61	CCL5,SFRP1,SLC11A1,SPI1,CEBPA,CEBPD,PDGFRB,TMEFF2,TJP2,COL1A2,IRF8,ID2	Ccl5;Sfrp1;Slc11a1;Spi1;Cebpa;Cebpd;Pdgfrb;Tmeff2;Tjp2;Col1a2;Irf8;Id2
P02769	Purine metabolism	PantherDB	0.001503	1	0.01926	0.162	3	4	AMPD3,XDH,GDA	Ampd3;Xdh;Gda
1269247	Alternative complement activation	BioSystems: REACTOME	0.001503	1	0.01926	0.162	3	4	CFB,C3,CFD	Cfb;C3;Cfd
M19118	Keratinocyte Differentiation	MSigDB C2 BIOCARTA (v6.0)	0.001578	1	0.02009	0.169	10	46	FOS,FASLG,TNF,TNFRSF1B,CEBPA,PRKCB,PRKCQ,MAPK8,MAP2K6,EGFR	Fos;Fasl;Tnf;Tnfrsf1b;Cebpa;Prkcb;Prkcq;Mapk8;Map2k6;Egfr
1269281	Regulation of actin dynamics for phagocytic cup formation	BioSystems: REACTOME	0.001584	1	0.02009	0.169	13	70	FCGR1A,FCGR2A,FCGR3A,BAIAP2,CYFIP2,BTK,SYK,CD3G,CD247,VAV1,WAS,ELMO1,ABI2	Fcgr1;Fcgr3;Fcgr4;Baiap2;Cyfip2;Btk;Syk;Cd3g;Cd247;Vav1;Was;Elmo1;Abi2
138071	PDGFR-beta signaling pathway	BioSystems: Pathway Interaction Database	0.001644	1	0.02054	0.1727	11	54	FGR,SLA,STAT1,GRB10,HCK,PDGFRB,SLC9A3R1,YES1,PTPRJ,LCK,LRP1	Fgr;Sla;Stat1;Grb10;Hck;Pdgfrb;Slc9a3r1;Yes1;Ptprj;Lck;Lrp1
1222950	Regulation of lipolysis in adipocytes	BioSystems: KEGG	0.001644	1	0.02054	0.1727	11	54	FABP4,ADORA1,ADRB3,IRS2,GNAI1,PDE3B,MGLL,PIK3CD,PTGS2,PNPLA2,LIPE	Fabp4;Adora1;Adrb3;Irs2;Gnai1;Pde3b;Mgll;Pik3cd;Ptgs2;Pnpla2;Lipe
169355	RAC1 signaling pathway	BioSystems: Pathway Interaction Database	0.001644	1	0.02054	0.1727	11	54	NCF1,BAIAP2,CYFIP2,ARHGAP5,NCF2,ATF2,MAPK8,MAP2K6,CYBA,CYBB,ABI2	Ncf1;Baiap2;Cyfip2;Arhgap5;Ncf2;Atf2;Mapk8;Map2k6;Cyba;Cybb;Abi2
1270241	Signal regulatory protein (SIRP) family interactions	BioSystems: REACTOME	0.001666	1	0.02071	0.1742	5	13	SIRPB1,PTK2B,TYROBP,SIRPA,PTPN6	Sirpb1a;Ptk2b;Tyrobp;Sirpa;Ptpn6
1269311	Interferon Signaling	BioSystems: REACTOME	0.001806	1	0.02235	0.188	27	202	FCGR1A,CIITA,EIF4E3,IFITM1,NDC1,GBP2,GBP3,STAT1,NUP210,TRIM2,CAMK2A,SOCS3,HLA-DQA1,HLA-DQB1,HLA-DRB5,TYK2,UBC,ICAM1,IRF8,SAMHD1,IFNG,EIF2AK2,GBP6,IRF5,ISG20,PTPN6,KPNB1	Fcgr1;Ciita;Eif4e3;Ifitm1;Ndc1;Gbp2;Gbp2b;Stat1;Nup210;Trim2;Camk2a;Socs3;H2-Aa;H2-Ab1;H2-Eb1;Tyk2;Ubc;Icam1;Irf8;Samhd1;Ifng;Eif2ak2;Gbp6;Irf5;Isg20;Ptpn6;Kpnb1
P00007	Axon guidance mediated by semaphorins	PantherDB	0.00184	1	0.02265	0.1905	6	19	SEMA3A,FES,SEMA4D,FRK,PLXNB1,RAC2	Sema3a;Fes;Sema4d;Frk;Plxnb1;Rac2
1269576	G alpha (i) signalling events	BioSystems: REACTOME	0.001849	1	0.02265	0.1905	31	243	CCR2,ADORA1,APLNR,CXCL9,CCL5,CXCL5,CXCL12,FPR1,FPR2,CXCL13,CXCR6,HCAR2,P2RY13,C3,GNAI1,C5AR1,GNGT2,CXCR3,GPR18,CXCL16,CXCL2,CXCL3,GNG2,PF4,CCR1,CCR5,CXCR4,ACKR3,P2RY14,RGS1,S1PR3	Ccr2;Adora1;Aplnr;Cxcl9;Ccl5;Cxcl5;Cxcl12;Fpr1;Fpr2;Cxcl13;Cxcr6;Hcar2;P2ry13;C3;Gnai1;C5ar1;Gngt2;Cxcr3;Gpr18;Cxcl16;Cxcl2;Cxcl3;Gng2;Pf4;Ccr1;Ccr5;Cxcr4;Ackr3;P2ry14;Rgs1;S1pr3
1270038	Regulation of cholesterol biosynthesis by SREBP (SREBF)	BioSystems: REACTOME	0.001921	1	0.02342	0.197	11	55	FDFT1,FDPS,MVD,SQLE,HMGCS1,ELOVL6,IDI1,HELZ2,CYP51A1,KPNB1,LSS	Fdft1;Fdps;Mvd;Sqle;Hmgcs1;Elovl6;Idi1;Helz2;Cyp51;Kpnb1;Lss
1269581	G beta:gamma signalling through PI3Kgamma	BioSystems: REACTOME	0.002215	1	0.02688	0.2261	10	48	GNGT2,PIK3R5,GNG2,PIK3CD,PIK3CG,CSF2RA,CSF2RB,PIK3R6,IL2RB,IL3RA	Gngt2;Pik3r5;Gng2;Pik3cd;Pik3cg;Csf2ra;Csf2rb;Pik3r6;Il2rb;Il3ra
172847	Protein digestion and absorption	BioSystems: KEGG	0.00223	1	0.02694	0.2266	15	90	ATP1A2,FXYD2,SLC7A8,COL14A1,COL1A2,COL4A5,COL5A2,COL6A2,COL9A1,COL11A1,COL12A1,COL27A1,CPA3,DPP4,KCNE3	Atp1a2;Fxyd2;Slc7a8;Col14a1;Col1a2;Col4a5;Col5a2;Col6a2;Col9a1;Col11a1;Col12a1;Col27a1;Cpa3;Dpp4;Kcne3
82937	Steroid biosynthesis	BioSystems: KEGG	0.002467	1	0.02941	0.2474	6	20	MSMO1,FDFT1,SQLE,CYP51A1,DHCR24,LSS	Msmo1;Fdft1;Sqle;Cyp51;Dhcr24;Lss
1268880	Constitutive Signaling by Aberrant PI3K in Cancer	BioSystems: REACTOME	0.002493	1	0.02941	0.2474	12	65	PIK3AP1,IRS2,CD28,CD86,HGF,PDGFRB,ICOS,PIK3CD,VAV1,TRAT1,LCK,EGFR	Pik3ap1;Irs2;Cd28;Cd86;Hgf;Pdgfrb;Icos;Pik3cd;Vav1;Trat1;Lck;Egfr
1270259	Collagen degradation	BioSystems: REACTOME	0.002494	1	0.02941	0.2474	9	41	MMP3,MMP8,MMP9,MMP12,MMP13,COL14A1,COL9A1,COL12A1,CTSB	Mmp3;Mmp8;Mmp9;Mmp12;Mmp13;Col14a1;Col9a1;Col12a1;Ctsb
138022	Class I PI3K signaling events	BioSystems: Pathway Interaction Database	0.002494	1	0.02941	0.2474	9	41	FGR,PREX1,BTK,HCK,VAV1,ARHGEF6,YES1,ITK,LCK	Fgr;Prex1;Btk;Hck;Vav1;Arhgef6;Yes1;Itk;Lck
1269250	Regulation of Complement cascade	BioSystems: REACTOME	0.002746	1	0.03223	0.2711	7	27	CFB,C2,C3,C5AR1,C6,CFH,CD55	Cfb;C2;C3;C5ar1;C6;Cfh;Cd55
P00036	Interleukin signaling pathway	PantherDB	0.002782	1	0.03251	0.2734	15	92	FOS,IRS2,SPI1,SPIB,STAT1,STAT4,RPS6KA6,IL1A,IL2RB,IL3RA,IL4R,IL10,IL10RA,IL12RB1,IL18	Fos;Irs2;Spi1;Spib;Stat1;Stat4;Rps6ka6;Il1a;Il2rb;Il3ra;Il4ra;Il10;Il10ra;Il12rb1;Il18
1270189	Biological oxidations	BioSystems: REACTOME	0.002845	1	0.03309	0.2783	29	229	EPHX1,MAOB,CYP39A1,MGST1,ALDH1A1,ALDH1B1,OPLAH,FMO1,CYP4F2,GSTK1,AOC3,CNDP2,CHAC2,GGT1,GGT7,SULT1A1,NNMT,CYP4V2,TBXAS1,PAPSS2,GSTA2,GSTM1,GSTT2,CYP7B1,SMOX,CYP1B1,CYP2F1,CYP4B1,CYP51A1	Ephx1;Maob;Cyp39a1;Mgst1;Aldh1a1;Aldh1b1;Oplah;Fmo1;Cyp4f18;Gstk1;Aoc3;Cndp2;Chac2;Ggt1;Ggt7;Sult1a1;Nnmt;Cyp4v3;Tbxas1;Papss2;Gsta2;Gstm1;Gstt2;Cyp7b1;Smox;Cyp1b1;Cyp2f2;Cyp4b1;Cyp51
M17406	Cytokine Network	MSigDB C2 BIOCARTA (v6.0)	0.003242	1	0.03754	0.3157	6	21	TNF,IFNG,IL1A,IL10,IL16,IL18	Tnf;Ifng;Il1a;Il10;Il16;Il18
M9494	BCR Signaling Pathway	MSigDB C2 BIOCARTA (v6.0)	0.003282	1	0.03771	0.3172	8	35	FOS,NFATC2,BTK,SYK,VAV1,PPP3CA,PRKCB,MAPK8	Fos;Nfatc2;Btk;Syk;Vav1;Ppp3ca;Prkcb;Mapk8
1270257	Degradation of the extracellular matrix	BioSystems: REACTOME	0.003287	1	0.03771	0.3172	17	112	A2M,ADAM8,MMP3,MMP8,MMP9,MMP12,MMP13,MMP16,NID1,CASP3,ADAMTS5,CMA1,COL14A1,COL9A1,COL12A1,CTSB,CTSS	A2m;Adam8;Mmp3;Mmp8;Mmp9;Mmp12;Mmp13;Mmp16;Nid1;Casp3;Adamts5;Cma1;Col14a1;Col9a1;Col12a1;Ctsb;Ctss
1269195	Antigen processing-Cross presentation	BioSystems: REACTOME	0.003383	1	0.03863	0.325	16	103	NCF1,FCGR1A,MRC1,NCF2,NCF4,BTK,CD14,CD36,TLR1,TLR2,TLR4,UBC,CTSS,CYBA,CYBB,PSMC6	Ncf1;Fcgr1;Mrc1;Ncf2;Ncf4;Btk;Cd14;Cd36;Tlr1;Tlr2;Tlr4;Ubc;Ctss;Cyba;Cybb;Psmc6
1270088	Synthesis of Prostaglandins (PG) and Thromboxanes (TX)	BioSystems: REACTOME	0.003434	1	0.03869	0.3254	5	15	FAM213B,TBXAS1,HPGD,PTGES,PTGS2	Fam213b;Tbxas1;Hpgd;Ptges;Ptgs2
1269246	Classical antibody-mediated complement activation	BioSystems: REACTOME	0.003434	1	0.03869	0.3254	5	15	C1QA,C1QB,C1QC,C1R,C1S	C1qa;C1qb;C1qc;C1ra;C1s1
M2587	Stress Induction of HSP Regulation	MSigDB C2 BIOCARTA (v6.0)	0.003434	1	0.03869	0.3254	5	15	FASLG,CASP3,TNF,IL1A,MAPKAPK3	Fasl;Casp3;Tnf;Il1a;Mapkapk3
1269580	G-protein beta:gamma signalling	BioSystems: REACTOME	0.003543	1	0.03975	0.3343	10	51	GNGT2,PIK3R5,GNG2,PIK3CD,PIK3CG,CSF2RA,CSF2RB,PIK3R6,IL2RB,IL3RA	Gngt2;Pik3r5;Gng2;Pik3cd;Pik3cg;Csf2ra;Csf2rb;Pik3r6;Il2rb;Il3ra
1269300	FCERI mediated Ca+2 mobilization	BioSystems: REACTOME	0.003952	1	0.04395	0.3696	8	36	LAT,NFATC2,BTK,SYK,VAV1,PPP3CA,ITK,LCP2	Lat;Nfatc2;Btk;Syk;Vav1;Ppp3ca;Itk;Lcp2
169350	Signaling events mediated by TCPTP	BioSystems: Pathway Interaction Database	0.003952	1	0.04395	0.3696	8	36	STAT1,HGF,PDGFRB,CSF1R,EIF2AK2,RAB4A,KPNB1,EGFR	Stat1;Hgf;Pdgfrb;Csf1r;Eif2ak2;Rab4a;Kpnb1;Egfr
692234	PI3K-Akt signaling pathway	BioSystems: KEGG	0.004087	1	0.04524	0.3805	39	342	PIK3AP1,VEGFD,FASLG,PDGFD,SYK,PDGFC,GNGT2,THBS1,CCNE2,TLR2,TLR4,TNXB,PIK3R5,PCK1,CDK6,HGF,PDGFRB,GNG2,SGK3,PIK3CD,PIK3CG,COL1A2,COL4A5,COL6A2,DDIT4,COL9A1,VWF,ATF2,IGF1,CSF1R,PIK3R6,CSF3R,IL2RB,IL3RA,IL4R,IL7R,ITGA4,ITGB7,EGFR	Pik3ap1;Vegfd;Fasl;Pdgfd;Syk;Pdgfc;Gngt2;Thbs1;Ccne2;Tlr2;Tlr4;Tnxb;Pik3r5;Pck1;Cdk6;Hgf;Pdgfrb;Gng2;Sgk3;Pik3cd;Pik3cg;Col1a2;Col4a5;Col6a2;Ddit4;Col9a1;Vwf;Atf2;Igf1;Csf1r;Pik3r6;Csf3r;Il2rb;Il3ra;Il4ra;Il7r;Itga4;Itgb7;Egfr
M3005	Genes encoding collagen proteins	MSigDB C2 BIOCARTA (v6.0)	0.004139	1	0.04562	0.3837	9	44	COL14A1,COL1A2,COL4A5,COL5A2,COL6A2,COL9A1,COL11A1,COL12A1,COL27A1	Col14a1;Col1a2;Col4a5;Col5a2;Col6a2;Col9a1;Col11a1;Col12a1;Col27a1
MAP00480_Glutathione_metabolism	MAP00480 Glutathione metabolism	GenMAPP	0.004185	1	0.04572	0.3846	6	22	MGST1,GGT1,GPX3,GSTA2,GSTM1,GSTT2	Mgst1;Ggt1;Gpx3;Gsta2;Gstm1;Gstt2
M7747	IL 2 signaling pathway	MSigDB C2 BIOCARTA (v6.0)	0.004185	1	0.04572	0.3846	6	22	FOS,SYK,CSNK2A1,MAPK8,IL2RB,LCK	Fos;Syk;Csnk2a1;Mapk8;Il2rb;Lck
1269308	Dectin-2 family	BioSystems: REACTOME	0.004242	1	0.04615	0.3882	7	29	FCER1G,CLEC10A,CLEC4D,SYK,CLEC4E,CLEC4A,CLEC6A	Fcer1g;Clec10a;Clec4d;Syk;Clec4e;Clec4a2;Clec4n
